# Supplementary material for: A Mutation in the Mitochondrial Aspartate/Glutamate Carrier Leads to a More Oxidizing Intramitochondrial Environment and an Inflammatory Myopathy in Dutch Shepherd Dogs
Source: PubMed Central journal article supplement — J Neuromuscul Dis. 2019 Oct 31;6(4):485–501. doi: 10.3233/JND-190421 (PMC6918910; doi:10.3233/jnd-190421), 2019-10-31
Supplement: jnd-6-jnd190421-s002.pdf [file jnd-6-jnd190421-s002.pdf]

| <b>No.</b> | <b>MRM Name</b>                   | <b>HMDB number</b> |
|------------|-----------------------------------|--------------------|
| 1          | L-Kynurenine                      | HMDB00183          |
| 2          | 5-Methyltetrahydrofolic acid      | HMDB01396          |
| 3          | O-Phosphoethanolamine             | HMDB00224          |
| 4          | PC(36:1)                          | HMDB08037          |
| 5          | PC(18:0/18:2)                     | HMDB00593          |
| 6          | 2-Methylcitric acid               | HMDB00379          |
| 7          | LysoPC(18:0)                      | HMDB10384          |
| 8          | L-Cystine                         | HMDB00192          |
| 9          | N-Acetyl-glucosamine 1-phosphate  | HMDB01367          |
| 10         | Cysteine                          | HMDB00574          |
| 11         | SM(d18:1/26:2)                    |                    |
| 12         | SM(d18:1/26:1 OH)                 |                    |
| 13         | DHC(18:1/24:1)                    |                    |
| 14         | Saccharopine                      | HMDB00279          |
| 15         | THC 18:1/24:0                     |                    |
| 16         | PA(18:0/18:1)                     |                    |
| 17         | AICAR                             | HMDB03192          |
| 18         | Pyroglutamic acid                 | HMDB00267          |
| 19         | PC(16:0/16:0)                     | HMDB00564          |
| 20         | Glycerophosphocholine             | HMDB00086          |
| 21         | PC(20:5/P-16:0)                   | HMDB11222          |
| 22         | THC 18:1/18:0                     |                    |
| 23         | Cytosine                          | HMDB00630          |
| 24         | PI(36:4)                          | HMDB09899          |
| 25         | 1-Methylhistidine                 | HMDB00001          |
| 26         | Dimethyl-L-arginine               | HMDB01539          |
| 27         | Histamine                         | HMDB00870          |
| 28         | Cytidine diphosphate ethanolamine | HMDB01564          |
| 29         | Phosphorylcholine                 | HMDB01565          |
| 30         | Oxaloacetic acid                  | HMDB00223          |
| 31         | Thiamine                          | HMDB00235          |
| 32         | CL(18:2/18:2/16:1/16:1)           | HMDB57668          |
| 33         | DHC(18:1/24:0)                    |                    |
| 34         | PI(16:0/16:0)                     | HMDB09778          |
| 35         | Hydroxyproline                    | HMDB00725          |
| 36         | 3, 5-Tetradecadiencarnitine       | HMDB06707          |
| 37         | PC(32:2)                          | HMDB07874          |
| 38         | L-Glutamic acid                   | HMDB00148          |
| 39         | PA(16:0/16:0)                     | HMDB00674          |
| 40         | Phosphoenolpyruvic acid           | HMDB00263          |

|    |                                |           |
|----|--------------------------------|-----------|
| 41 | Quinolinic Acid                | HMDB00232 |
| 42 | Indoxyl sulfate                | HMDB00682 |
| 43 | L-Proline                      | HMDB00162 |
| 44 | SM(d18:1/24:2)                 |           |
| 45 | Gamma-Aminobutyric acid        | HMDB00112 |
| 46 | Oxidized glutathione           | HMDB03337 |
| 47 | Guanosine                      | HMDB00133 |
| 48 | Citrulline                     | HMDB00904 |
| 49 | Cyclic adenosine monophosphate | HMDB00058 |
| 50 | Amino adipic acid              | HMDB00510 |
| 51 | Azelaic acid                   | HMDB00784 |
| 52 | Xanthosine                     | HMDB00299 |

---

| Pathway Name                                             | PLSDA VIP Score | Log Space Z-Score | Linear Z Score |
|----------------------------------------------------------|-----------------|-------------------|----------------|
| Tryptophan, Kynurenine, Serotonin, Melatonin Metabolism  | 2.9004          | 3.35442003        | 12.5384175     |
| 1-Carbon, Folate Metabolism                              | 2.5871          | 3.74869319        | 26.7502481     |
| Phospholipid Metabolism                                  | 2.5498          | 2.4734549         | 6.5470998      |
| Phospholipid Metabolism                                  | 2.5474          | 2.37123921        | 3.91230155     |
| Phospholipid Metabolism                                  | 2.3964          | 2.08044024        | 3.35025884     |
| Krebs Cycle                                              | 2.3523          | 2.1813191         | 2.99447776     |
| Phospholipid Metabolism                                  | 2.3318          | 1.95139246        | 3.50923728     |
| SAM, SAH, Methionine, Cysteine, Glutathione Metabolism   | 2.2671          | 1.90818125        | 5.67351552     |
| Amino-Sugar, Galactose, & Non-Glucose Metabolism         | 2.2549          | 1.83198111        | 4.96190933     |
| SAM, SAH, Methionine, Cysteine, Glutathione Metabolism   | 2.1628          | 1.70259263        | 3.0558659      |
| Sphingomyelin Metabolism                                 | 2.1332          | 1.61242165        | 3.00252649     |
| Sphingomyelin Metabolism                                 | 2.0659          | 1.70380709        | 4.87961881     |
| Glycosphingolipid Metabolism                             | 2.029           | -1.5190747        | -0.7242155     |
| Lysine Metabolism                                        | 1.9615          | 1.40012289        | 0.93104424     |
| Glycosphingolipid Metabolism                             | 1.9384          | 1.6071381         | 3.2263881      |
| Phospholipid Metabolism                                  | 1.9331          | 1.37828577        | 1.75018333     |
| Purine Metabolism                                        | 1.9249          | 1.39470503        | 2.10577141     |
| GABA, Glutamate, Arginine, Ornithine, Proline Metabolism | 1.8983          | 1.3662314         | 2.85055144     |
| Phospholipid Metabolism                                  | 1.8693          | 1.35455391        | 1.82980301     |
| Phospholipid Metabolism                                  | 1.8597          | 1.32335602        | 3.71714923     |
| Plasmalogen Metabolism                                   | 1.8315          | -1.3629046        | -1.1629483     |
| Glycosphingolipid Metabolism                             | 1.8194          | 1.61158717        | 4.3369623      |
| Pyrimidine Metabolism                                    | 1.8143          | 1.23933292        | 2.66395313     |
| Phospholipid Metabolism                                  | 1.8077          | 1.36351442        | 2.07669382     |
| Histidine, Histamine, Carnosine Metabolism               | 1.7941          | 1.2713469         | 2.55437839     |
| Nitric Oxide, Superoxide, Peroxide Metabolism            | 1.782           | 1.29020154        | 2.24709817     |
| Histidine, Histamine, Carnosine Metabolism               | 1.7658          | 1.1874164         | 2.68461461     |
| Phospholipid Metabolism                                  | 1.712           | 1.17114135        | 3.58398281     |
| Phospholipid Metabolism                                  | 1.7103          | 1.20787446        | 1.09040879     |
| Krebs Cycle                                              | 1.7006          | 1.28379673        | 1.92751689     |
| Vitamin B1 (Thiamine) Metabolism                         | 1.6977          | 1.12829167        | 2.48306702     |
| Cardiolipin Metabolism                                   | 1.672           | 1.15611569        | 2.33559116     |
| Glycosphingolipid Metabolism                             | 1.6549          | -1.112423         | -0.700723      |
| Phospholipid Metabolism                                  | 1.6513          | 1.1526124         | 1.39331227     |
| Vitamin C (Ascorbate) Metabolism                         | 1.6463          | 1.10891694        | 0.96058479     |
| Fatty Acid Oxidation and Synthesis                       | 1.6437          | -1.1113642        | -0.6548789     |
| Phospholipid Metabolism                                  | 1.6382          | -1.2420047        | -1.0345524     |
| Bioamines and Neurotransmitter Metabolism                | 1.6223          | 1.07486837        | 1.34383836     |
| Phospholipid Metabolism                                  | 1.6206          | 1.07961931        | 1.13366401     |
| Glycolysis and Gluconeogenesis Metabolism                | 1.6081          | 1.26462905        | 6.98985685     |

|                                                          |        |            |            |
|----------------------------------------------------------|--------|------------|------------|
| Tryptophan, Kynurenine, Serotonin, Melatonin Metabolism  | 1.6043 | 1.34488331 | 1.8068242  |
| Microbiome Metabolism                                    | 1.6027 | 1.05816709 | 2.1541195  |
| GABA, Glutamate, Arginine, Ornithine, Proline Metabolism | 1.5899 | 1.03686588 | 1.22379204 |
| Sphingomyelin Metabolism                                 | 1.5848 | 1.04472549 | 1.64879271 |
| GABA, Glutamate, Arginine, Ornithine, Proline Metabolism | 1.5825 | 1.03158386 | 1.28166938 |
| SAM, SAH, Methionine, Cysteine, Glutathione Metabolism   | 1.5769 | 1.05217919 | 2.12105721 |
| Purine Metabolism                                        | 1.5376 | 1.04315903 | 1.89391192 |
| Urea Cycle                                               | 1.5353 | 0.9864995  | 0.94555475 |
| Purine Metabolism                                        | 1.5176 | 1.03413145 | 1.28000526 |
| Lysine Metabolism                                        | 1.5152 | 0.99071056 | 0.72231299 |
| Nitric Oxide, Superoxide, Peroxide Metabolism            | 1.506  | -1.0065138 | -0.9295727 |
| Purine Metabolism                                        | 1.5005 | 0.95738142 | 0.60747295 |

---

|                |            |            |
|----------------|------------|------------|
| <b>Mean</b>    | 1.86171923 | 1.16464621 |
| <b>Minimum</b> | 1.5005     | -1.5190747 |
| <b>Maximum</b> | 2.9004     | 3.74869319 |
| <b>SD</b>      | 0.3313224  | 1.03265562 |

| Student's<br>ttest p | Mann-<br>Whitney U<br>test p | Welch's ttest<br>p | D'Agostino &<br>Pearson<br>omnibus p | D'Agostino &<br>Pearson<br>omnibus p<br>(Linear) | FDR        | q-Value    |
|----------------------|------------------------------|--------------------|--------------------------------------|--------------------------------------------------|------------|------------|
| 2.9295E-06           | 0.00095693                   | 0.00040566         | 0.44118826                           | 0.7050959                                        | 0.00110734 | 0.00066579 |
| 0.00011745           | 0.00499343                   | 0.03351901         | 0.00582932                           | 2.6706E-09                                       | 0.01591869 | 0.00957112 |
| 0.00016498           | 0.00295287                   | 0.00483545         | 0.75029607                           | 0.07564963                                       | 0.01591869 | 0.00957112 |
| 0.00016845           | 0.0022493                    | 0.00207766         | 0.96186965                           | 0.25914828                                       | 0.01591869 | 0.00957112 |
| 0.00057525           | 0.00295287                   | 0.00327779         | 0.70770066                           | 0.03983242                                       | 0.04348924 | 0.02614793 |
| 0.00079285           | 0.00565626                   | 0.01506584         | 0.59207397                           | 0.18306753                                       | 0.04944893 | 0.0297312  |
| 0.00091572           | 0.00295287                   | 0.00288863         | 0.69617177                           | 0.20706427                                       | 0.04944893 | 0.0297312  |
| 0.00141426           | 0.00643238                   | 0.00761739         | 0.7984412                            | 0.00616702                                       | 0.06429206 | 0.03865564 |
| 0.00153076           | 0.00385205                   | 0.00353137         | 0.56360366                           | 0.3117549                                        | 0.06429206 | 0.03865564 |
| 0.00269513           | 0.00436375                   | 0.00463359         | 0.58506145                           | 0.08456663                                       | 0.10187576 | 0.06125286 |
| 0.00319935           | 0.00385205                   | 0.00120095         | 0.09880654                           | 0.00066132                                       | 0.10994116 | 0.06610219 |
| 0.00464138           | 0.00823419                   | 0.0258379          | 4.5428E-05                           | 0.67803378                                       | 0.14620348 | 0.08790493 |
| 0.00564018           | 0.00924881                   | 0.00494251         | 0.45755457                           | 0.00021874                                       | 0.16399909 | 0.09860455 |
| 0.00792466           | 0.00823419                   | 0.00125358         | 0.16882048                           | 2.7644E-05                                       | 0.21010449 | 0.12632545 |
| 0.00886238           | 0.02578387                   | 0.04975054         | 0.34345326                           | 0.0908646                                        | 0.21010449 | 0.12632545 |
| 0.00909006           | 0.01047503                   | 0.00215653         | 0.57707817                           | 0.53171343                                       | 0.21010449 | 0.12632545 |
| 0.00944914           | 0.01047503                   | 0.00567671         | 0.69845226                           | 1.9091E-07                                       | 0.21010449 | 0.12632545 |
| 0.01070504           | 0.01047503                   | 0.00619477         | 0.44042219                           | 0.40133143                                       | 0.22480583 | 0.13516464 |
| 0.01222138           | 0.01324294                   | 0.01106851         | 0.67281143                           | 0.58149654                                       | 0.24112807 | 0.1449784  |
| 0.0127581            | 0.00643238                   | 0.00646923         | 1.8522E-05                           | 0.8849637                                        | 0.24112807 | 0.1449784  |
| 0.01445597           | 0.00821335                   | 0.02708179         | 0.24900664                           | 0.61098724                                       | 0.2523649  | 0.15173455 |
| 0.01523792           | 0.06900879                   | 0.09995481         | 0.0004617                            | 0.19472026                                       | 0.2523649  | 0.15173455 |
| 0.01557614           | 0.00385205                   | 0.0011862          | 0.00027703                           | 0.65749341                                       | 0.2523649  | 0.15173455 |
| 0.01602317           | 0.02573577                   | 0.03767808         | 0.25148818                           | 0.31719201                                       | 0.2523649  | 0.15173455 |
| 0.01698436           | 0.01324294                   | 0.01200205         | 0.34839522                           | 0.12127268                                       | 0.25680357 | 0.1544033  |
| 0.01787154           | 0.02578387                   | 0.02306716         | 0.48847098                           | 0.1078692                                        | 0.25982475 | 0.15621979 |
| 0.01912347           | 0.00384056                   | 0.00096407         | 0.00011596                           | 0.97151073                                       | 0.26772853 | 0.16097194 |
| 0.02378174           | 0.01321311                   | 0.00802826         | 0.00510489                           | 0.68756126                                       | 0.30676105 | 0.18444027 |
| 0.02393836           | 0.03180289                   | 0.02298733         | 0.30410696                           | 1.3755E-05                                       | 0.30676105 | 0.18444027 |
| 0.02488038           | 0.01663868                   | 0.06234297         | 0.04074457                           | 0.78813738                                       | 0.30676105 | 0.18444027 |
| 0.02515765           | 0.00643238                   | 0.00164777         | 0.02856675                           | 0.06716989                                       | 0.30676105 | 0.18444027 |
| 0.02780041           | 0.01324294                   | 0.01825599         | 3.8994E-06                           | 0.31601181                                       | 0.32277055 | 0.19406599 |
| 0.02967513           | 0.01663868                   | 0.00739016         | 0.53585788                           | 0.00069905                                       | 0.32277055 | 0.19406599 |
| 0.0300742            | 0.02578387                   | 0.02731976         | 0.84231928                           | 0.02954488                                       | 0.32277055 | 0.19406599 |
| 0.03065458           | 0.03898861                   | 0.00914497         | 0.95693865                           | 1.6699E-07                                       | 0.32277055 | 0.19406599 |
| 0.03095647           | 0.03898861                   | 0.01114561         | 0.8533621                            | 0.0007539                                        | 0.32277055 | 0.19406599 |
| 0.03159394           | 0.06292959                   | 0.08140651         | 0.86545463                           | 0.41126942                                       | 0.32277055 | 0.19406599 |
| 0.03352032           | 0.03898861                   | 0.00531188         | 0.53815422                           | 0.17129137                                       | 0.32414003 | 0.19488939 |
| 0.03373321           | 0.03898861                   | 0.00743582         | 0.7770284                            | 0.22630196                                       | 0.32414003 | 0.19488939 |
| 0.0353131            | 0.0829149                    | 0.11049857         | 0.4088727                            | 0.2395195                                        | 0.32414003 | 0.19488939 |

|            |            |            |            |            |            |            |
|------------|------------|------------|------------|------------|------------|------------|
| 0.03579611 | 0.06909915 | 0.141891   | 0.81261781 | 0.53499823 | 0.32414003 | 0.19488939 |
| 0.03601556 | 0.01324294 | 0.0058173  | 0.10106836 | 0.05969326 | 0.32414003 | 0.19488939 |
| 0.03771846 | 0.02077637 | 0.00316828 | 0.15904744 | 0.01389608 | 0.32469917 | 0.19522557 |
| 0.03841093 | 0.01663868 | 0.0069058  | 0.00274046 | 0.47516454 | 0.32469917 | 0.19522557 |
| 0.03872597 | 0.01660342 | 0.00348876 | 0.34613567 | 0.22302111 | 0.32469917 | 0.19522557 |
| 0.03951366 | 0.02578387 | 0.01366051 | 0.2342387  | 0.00882044 | 0.32469917 | 0.19522557 |
| 0.04534428 | 0.03898861 | 0.03211755 | 0.23846575 | 0.10888032 | 0.35996599 | 0.21642976 |
| 0.04570997 | 0.07575257 | 0.00285021 | 0.10834425 | 0.2838774  | 0.35996599 | 0.21642976 |
| 0.04855892 | 0.04750893 | 0.04030564 | 0.9703255  | 7.9661E-05 | 0.37013811 | 0.22254576 |
| 0.04896007 | 0.02578387 | 0.01127842 | 0.03259399 | 5.1159E-06 | 0.37013811 | 0.22254576 |
| 0.05051522 | 0.03180289 | 0.02776171 | 0.81154968 | 0.53730784 | 0.37092136 | 0.22301669 |
| 0.05145822 | 0.02578387 | 0.00316432 | 0.94797367 | 0.00056365 | 0.37092136 | 0.22301669 |

---

|            |            |  |  |  |            |  |
|------------|------------|--|--|--|------------|--|
| 0.02126825 | 0.02166943 |  |  |  | 0.23977626 |  |
| 2.9295E-06 | 0.00095693 |  |  |  | 0.00110734 |  |
| 0.05145822 | 0.0829149  |  |  |  | 0.37092136 |  |
| 0.0160884  | 0.02055502 |  |  |  | 0.11350757 |  |

| Log2 Control<br>Mean | Log2 Control<br>Median | Control SD* | Control SEM* | Log2 Case<br>Mean | Log2 Case<br>Median | Case SD*   |
|----------------------|------------------------|-------------|--------------|-------------------|---------------------|------------|
| 19.5820949           | 19.8179236             | 1.8501854   | 1.16628264   | 22.5597124        | 22.9512705          | 1.8591063  |
| 10.4537203           | 10.3427577             | 2.16321125  | 1.21275963   | 14.6266702        | 15.8237653          | 7.89276878 |
| 17.7546967           | 17.7947226             | 1.90935901  | 1.17549801   | 20.0626487        | 20.0156328          | 2.09965683 |
| 22.4470071           | 22.4386837             | 1.51912625  | 1.11019296   | 23.8774377        | 23.9225234          | 1.49463941 |
| 22.9622552           | 22.99159               | 1.58394873  | 1.12185126   | 24.3426806        | 24.4105404          | 1.52875883 |
| 17.503547            | 17.4272158             | 1.35556683  | 1.07902183   | 18.4609197        | 18.7273355          | 1.48192999 |
| 20.2139942           | 20.1885666             | 1.80738603  | 1.15947858   | 21.8802973        | 21.9387641          | 1.65797791 |
| 16.799131            | 16.6704798             | 3.32397393  | 1.35025067   | 20.1058356        | 20.857568           | 3.28764727 |
| 19.49922             | 19.6213746             | 2.40389978  | 1.24517126   | 21.8173663        | 21.6757297          | 2.07618417 |
| 18.067338            | 18.0969785             | 1.99261932  | 1.18810845   | 19.7608492        | 20.0156328          | 1.75247782 |
| 23.3196399           | 23.3792199             | 2.6044241   | 1.27036326   | 25.5463368        | 25.8312276          | 1.81401611 |
| 19.9569527           | 20.1364134             | 1.79579075  | 1.15761443   | 21.396021         | 21.1206024          | 1.97813802 |
| 18.1078786           | 17.6891321             | 2.38963734  | 1.24332023   | 16.1987181        | 16.1236365          | 1.89683796 |
| 20.0767027           | 20.0769518             | 4.27852932  | 1.43821438   | 23.0129214        | 23.1030957          | 2.15936667 |
| 16.5866855           | 16.5032271             | 2.19427636  | 1.21709038   | 18.4087707        | 18.833063           | 2.82536206 |
| 20.7659567           | 20.7347897             | 1.57961666  | 1.12108341   | 21.6750388        | 21.6971033          | 1.29774221 |
| 20.5538623           | 20.434556              | 5.98840752  | 1.56432806   | 24.1552312        | 24.4105404          | 3.42802241 |
| 18.3742081           | 18.6734158             | 2.66866824  | 1.27812593   | 20.3089557        | 20.5068809          | 1.95716608 |
| 20.9331203           | 21.0183562             | 1.59752859  | 1.12424809   | 21.8485844        | 21.7915381          | 1.42884633 |
| 26.1058002           | 26.3178186             | 2.35034578  | 1.23817759   | 27.7373301        | 27.925922           | 1.76602551 |
| 20.2261511           | 20.5362641             | 2.15689156  | 1.21187291   | 18.7147531        | 18.1556088          | 2.06535042 |
| 13.8130528           | 13.9246195             | 1.70757691  | 1.14312854   | 15.0571184        | 15.6855153          | 2.47083716 |
| 25.1867327           | 25.5074732             | 2.42237426  | 1.24755675   | 26.7686442        | 26.5754248          | 1.46742341 |
| 23.301765            | 23.4477292             | 1.73743633  | 1.14809341   | 24.3884316        | 24.3443501          | 1.76805942 |
| 23.0211085           | 23.4847218             | 2.63531367  | 1.27411339   | 24.7984193        | 25.0105199          | 2.01519648 |
| 23.0705435           | 23.3576929             | 2.61036866  | 1.27108754   | 24.8565096        | 25.1292767          | 2.27249568 |
| 25.2876345           | 25.649039              | 2.56187018  | 1.26514202   | 26.899193         | 26.7129283          | 1.42403565 |
| 16.9994532           | 17.5280267             | 3.4643368   | 1.36428476   | 19.0988168        | 19.7240075          | 2.10796251 |
| 23.8197542           | 23.8505402             | 2.32802801  | 1.23522778   | 25.2922842        | 25.0813157          | 1.95901338 |
| 18.6788752           | 18.7322666             | 1.41805798  | 1.09124809   | 19.3258016        | 19.1129892          | 1.48392334 |
| 21.9564947           | 22.2631156             | 3.92012629  | 1.40710017   | 24.1802449        | 24.052584           | 1.69674905 |
| 23.927947            | 24.0928932             | 1.75303315  | 1.15066137   | 24.8642311        | 24.7491918          | 1.49377633 |
| 15.3711898           | 15.2187397             | 2.30864272  | 1.2326483    | 14.0284452        | 14.0275605          | 1.58326222 |
| 19.5860028           | 19.4405295             | 2.44080715  | 1.24992331   | 21.0698279        | 21.5165311          | 2.02326567 |
| 20.0810835           | 20.0744176             | 4.99812442  | 1.49520853   | 22.6553086        | 22.6735748          | 2.52223993 |
| 19.0496594           | 18.8188704             | 2.83590759  | 1.29769616   | 17.3783782        | 17.0425999          | 1.87772214 |
| 21.5495733           | 21.5668031             | 1.27089629  | 1.06176286   | 21.1200306        | 21.1456934          | 1.33247777 |
| 23.7464441           | 23.9897405             | 2.92949719  | 1.30827268   | 25.4131921        | 25.7542987          | 1.67600538 |
| 20.7590931           | 20.7222442             | 1.78740364  | 1.15626042   | 21.6636688        | 21.6885918          | 1.3575047  |
| 17.8958775           | 18.2420588             | 3.10986404  | 1.32796109   | 19.9658875        | 19.6382096          | 4.74849782 |

|            |            |            |            |            |            |            |
|------------|------------|------------|------------|------------|------------|------------|
| 17.700431  | 17.7854546 | 1.27584674 | 1.06279531 | 18.173097  | 18.1002106 | 1.48792108 |
| 19.8041828 | 20.5336389 | 4.00828382 | 1.41494519 | 21.9236752 | 21.7715282 | 1.94423585 |
| 25.4520905 | 25.6052907 | 2.4874386  | 1.25585093 | 26.8152176 | 26.8142116 | 1.42143519 |
| 23.7167922 | 24.0057306 | 2.1453097  | 1.21024278 | 24.8672292 | 24.9890188 | 1.4537534  |
| 18.0284195 | 18.3885293 | 2.41481197 | 1.24658194 | 19.3405022 | 19.2511865 | 1.41443911 |
| 20.1205426 | 20.753081  | 4.5188137  | 1.45799525 | 22.4100257 | 23.027493  | 2.43708525 |
| 21.2238885 | 21.683262  | 3.5564069  | 1.37326029 | 23.1333081 | 23.2448144 | 2.54221921 |
| 22.5484015 | 22.4371285 | 2.31669643 | 1.23372192 | 23.7441069 | 23.7695118 | 1.30745599 |
| 16.262051  | 16.3611153 | 2.8584051  | 1.30026222 | 17.8289778 | 17.9430642 | 2.26462483 |
| 18.9695712 | 18.8174117 | 1.57302803 | 1.11991256 | 19.6170446 | 19.6522848 | 1.26175446 |
| 21.2688489 | 21.2533928 | 1.29606991 | 1.06698203 | 20.8922683 | 20.9459239 | 1.19126281 |
| 21.9916302 | 21.891577  | 3.81405021 | 1.39748322 | 23.8406438 | 23.4800052 | 1.49173129 |

---



| Case SEM*  | Linear Control |                  |                   |             | Linear Case    |             |
|------------|----------------|------------------|-------------------|-------------|----------------|-------------|
|            | Mean (Geomean) | 2.50% Threshold# | 97.50% Threshold+ | Hi/Lo Ratio | Mean (Geomean) | Fold Change |
| 1.31958238 | 784870.363     | 234993.603       | 2621439.39        | 11.1553649  | 6182300.59     | 7.87684296  |
| 2.51914507 | 1402.43707     | 309.093217       | 6363.22515        | 20.5867512  | 25296.8514     | 18.0377801  |
| 1.39337851 | 221154.746     | 62252.4685       | 785662.365        | 12.6205817  | 1095113.32     | 4.95179661  |
| 1.19689228 | 5717714.3      | 2519407.8        | 12976167.2        | 5.15048308  | 15410791.8     | 2.69527139  |
| 1.20903507 | 8171985.29     | 3317683.72       | 20128905.9        | 6.06715638  | 21275366       | 2.60345133  |
| 1.19232998 | 185820.09      | 102361.264       | 337325.903        | 3.29544489  | 360819.98      | 1.94177056  |
| 1.25371435 | 1216238.01     | 381240.269       | 3880059.42        | 10.1774648  | 3860342.16     | 3.17400223  |
| 1.70277826 | 114036.096     | 10829.1266       | 1200856.89        | 110.89139   | 1128390.99     | 9.89503348  |
| 1.38639063 | 741054.436     | 132817.118       | 4134720.63        | 31.1309317  | 3695572.11     | 4.98691045  |
| 1.28518227 | 274669.653     | 71111.3587       | 1060919.37        | 14.9191267  | 888399.589     | 3.23442936  |
| 1.30517226 | 10469142.1     | 1603674.25       | 68344888.3        | 42.6176877  | 49001982.2     | 4.68061103  |
| 1.35671921 | 1017750.65     | 323072.622       | 3206141.02        | 9.92390194  | 2759587.09     | 2.71145697  |
| 1.33149304 | 282497.5       | 51225.2276       | 1557920.61        | 30.4131515  | 75214.235      | 0.26624744  |
| 1.41096197 | 1105833.45     | 64025.426        | 19099718.5        | 298.314587  | 8464077.34     | 7.65402543  |
| 1.59120624 | 98421.4761     | 21093.9969       | 459220.08         | 21.7701786  | 348010.355     | 3.53591887  |
| 1.12361985 | 1783100.61     | 727804.113       | 4368548.79        | 6.00236893  | 3348396.19     | 1.8778504   |
| 1.73491737 | 1539320.64     | 46110.3961       | 51387718          | 1114.44972  | 18683108.5     | 12.1372429  |
| 1.35026765 | 339772.156     | 49619.2727       | 2326618.5         | 46.8894115  | 1298987.09     | 3.82311226  |
| 1.17303679 | 2002152.28     | 799351.462       | 5014832.56        | 6.27362656  | 3776411        | 1.88617571  |
| 1.28961597 | 72215249.9     | 13527285.9       | 385520226         | 28.4994514  | 223752743      | 3.09841403  |
| 1.38315065 | 1226530.02     | 271878.391       | 5533267.57        | 20.3519947  | 430231.351     | 0.35077116  |
| 1.49859829 | 14392.7311     | 5042.87121       | 41077.9298        | 8.14574239  | 34091.3563     | 2.36865095  |
| 1.18709605 | 38191088.8     | 6742938.58       | 216309143         | 32.0793583  | 114331226      | 2.99366239  |
| 1.29027998 | 10340230.4     | 3501940.63       | 30531747.1        | 8.71852219  | 21960865.8     | 2.12382751  |
| 1.36802766 | 8512246.66     | 1274127.43       | 56868992.6        | 44.6336775  | 29178842.4     | 3.42786618  |
| 1.44355395 | 8808979.6      | 1343352.49       | 57764527.4        | 43.0002757  | 30377705.5     | 3.44849312  |
| 1.17126891 | 40957790.2     | 6479844.2        | 258885944         | 39.9524951  | 125159535      | 3.05581756  |
| 1.39584079 | 131022.33      | 11473.3412       | 1496238.17        | 130.409977  | 561457.31      | 4.28520321  |
| 1.35083746 | 14806776.3     | 2825944.58       | 77581360.1        | 27.453249   | 41090004.6     | 2.77508107  |
| 1.19304696 | 419663.998     | 211632.079       | 832188.923        | 3.93224377  | 657121.929     | 1.56582869  |
| 1.26674185 | 4069710.41     | 279701.885       | 59214984.6        | 211.707492  | 19009864.5     | 4.67106074  |
| 1.19658314 | 15959885.8     | 5311303.6        | 47957709.4        | 9.02936699  | 30540727.2     | 1.91359309  |
| 1.22812549 | 42382.7575     | 8222.61625       | 218458.223        | 26.5679702  | 16710.2448     | 0.39426988  |
| 1.3704747  | 786999.281     | 136901.669       | 4524180.56        | 33.0469351  | 2201152.91     | 2.79689317  |
| 1.51246154 | 1109196.45     | 47352.9051       | 25981864.6        | 548.685758  | 6605831.08     | 5.95551047  |
| 1.32547533 | 542648.832     | 70346.4857       | 4185962.55        | 59.5049278  | 170377.838     | 0.31397439  |
| 1.13697165 | 3069502.3      | 1918722.39       | 4910478.14        | 2.55924368  | 2279096.51     | 0.74249709  |
| 1.25979248 | 14073171.5     | 1711896.61       | 115692825         | 67.5816661  | 44682051.1     | 3.17498094  |
| 1.14647274 | 1774637.65     | 568529.917       | 5539442.51        | 9.74344946  | 3322110.86     | 1.8719939   |
| 2.00708216 | 243891.084     | 26388.9905       | 2254078.69        | 85.4173897  | 1024073.23     | 4.19889574  |

|            |            |            |            |            |            |            |
|------------|------------|------------|------------|------------|------------|------------|
| 1.19448328 | 212990.706 | 132128.217 | 343341.05  | 2.59854449 | 295561.118 | 1.38767144 |
| 1.34627089 | 915488.835 | 60235.769  | 13913988.7 | 230.992131 | 3978174.78 | 4.34541048 |
| 1.17031189 | 45903172.3 | 7694281.2  | 273852900  | 35.5917458 | 118082307  | 2.5724215  |
| 1.1821377  | 13786875.5 | 3088484.75 | 61544074.7 | 19.9269479 | 30604261.4 | 2.21981125 |
| 1.16773239 | 267359.147 | 47494.5459 | 1505034.15 | 31.6885681 | 663852.05  | 2.48299734 |
| 1.48940856 | 1139952.78 | 59297.8524 | 21914660.9 | 369.569218 | 5573011.54 | 4.88880914 |
| 1.51780773 | 2449215.92 | 203725.149 | 29444860.7 | 144.532282 | 9200673.82 | 3.7565793  |
| 1.12737337 | 6134020.09 | 1181957.06 | 31833815.1 | 26.9331401 | 14050391   | 2.29056814 |
| 1.44131583 | 78589.6129 | 10031.423  | 615698.015 | 61.3769365 | 232839.734 | 2.96272911 |
| 1.10957669 | 513345.724 | 211254.751 | 1247422.04 | 5.90482359 | 804116.25  | 1.56642242 |
| 1.0814131  | 2526745.53 | 1519881.71 | 4200618.33 | 2.76377977 | 1946253.65 | 0.77026104 |
| 1.19585025 | 4170041.15 | 302428.687 | 57498656.5 | 190.123024 | 15022730.8 | 3.60253779 |

---

| Log2 SEM   | Linear SEM | Percent Difference (Case/Control -1) | Standard Error of the Difference (%) | Spearman_r | Spearman_p | Pearson_r  |
|------------|------------|--------------------------------------|--------------------------------------|------------|------------|------------|
| 0.45750684 | 1.37316676 | 6.876842961                          | 0.373166757                          | 0.73854895 | 0.00013169 | 0.83197268 |
| 1.36167578 | 2.56983509 | 17.03778008                          | 1.569835091                          | 0.6277666  | 0.00231321 | 0.7420945  |
| 0.53241112 | 1.44634439 | 3.951796609                          | 0.446344392                          | 0.66469405 | 0.00101236 | 0.73140054 |
| 0.29996135 | 1.23111143 | 1.69527139                           | 0.23111143                           | 0.68315777 | 0.00064162 | 0.73072856 |
| 0.32017776 | 1.24848437 | 1.603451332                          | 0.248484373                          | 0.66469405 | 0.00101236 | 0.6873952  |
| 0.27648773 | 1.2112425  | 0.941770562                          | 0.211242498                          | 0.61873566 | 0.0027879  | 0.67474599 |
| 0.38985148 | 1.31025851 | 2.174002234                          | 0.310258514                          | 0.66469405 | 0.00101236 | 0.6688653  |
| 0.88166989 | 1.84250673 | 8.895033484                          | 0.842506733                          | 0.60930288 | 0.00336817 | 0.65032412 |
| 0.56765236 | 1.48210983 | 3.986910449                          | 0.482109827                          | 0.64623033 | 0.00155081 | 0.6468117  |
| 0.43915769 | 1.35581252 | 2.234429362                          | 0.355812515                          | 0.6374125  | 0.00188306 | 0.62039345 |
| 0.51655781 | 1.43053799 | 3.680611028                          | 0.430537985                          | 0.64623033 | 0.00155081 | 0.61189732 |
| 0.48815354 | 1.40264852 | 1.711456971                          | 0.402648522                          | 0.59083916 | 0.00479766 | 0.59261464 |
| 0.51896668 | 1.43292855 | -0.733752564                         | 0.432928551                          | -0.5819853 | 0.00564362 | -0.582019  |
| 0.72218996 | 1.64968429 | 6.654025431                          | 0.649684295                          | 0.59083916 | 0.00479766 | 0.56265096 |
| 0.72759747 | 1.65587925 | 2.53591887                           | 0.655879251                          | 0.49852054 | 0.02143549 | 0.55602188 |
| 0.23551153 | 1.1773241  | 0.877850398                          | 0.177324103                          | 0.57237543 | 0.00669779 | 0.5544996  |
| 1.02398211 | 2.03352413 | 11.13724287                          | 1.033524133                          | 0.57237543 | 0.00669779 | 0.55216102 |
| 0.55949872 | 1.47375706 | 2.823112258                          | 0.473757056                          | 0.57237543 | 0.00669779 | 0.54451502 |
| 0.28559043 | 1.218909   | 0.886175714                          | 0.218909003                          | 0.55391171 | 0.00917926 | 0.5362033  |
| 0.47921245 | 1.3939825  | 2.098414026                          | 0.3939825                            | 0.60930288 | 0.00336817 | 0.53346218 |
| 0.54391737 | 1.45792588 | -0.649228845                         | 0.457925879                          | -0.5910311 | 0.00478056 | -0.5253662 |
| 0.61469439 | 1.5312336  | 1.368650947                          | 0.531233599                          | 0.40659815 | 0.06738084 | 0.52189444 |
| 0.40379845 | 1.3229866  | 1.993662388                          | 0.322986602                          | 0.64623033 | 0.00155081 | 0.52043725 |
| 0.41819639 | 1.33625597 | 1.123827505                          | 0.33625597                           | 0.49868247 | 0.02138653 | 0.51854995 |
| 0.57143493 | 1.48600084 | 2.427866179                          | 0.486000841                          | 0.55391171 | 0.00917926 | 0.51463146 |
| 0.63266305 | 1.55042426 | 2.448493118                          | 0.550424261                          | 0.49852054 | 0.02143549 | 0.51117009 |
| 0.40882886 | 1.32760766 | 2.055817559                          | 0.327607662                          | 0.64644024 | 0.00154354 | 0.50651336 |
| 0.65751355 | 1.57736173 | 3.285203208                          | 0.577361731                          | 0.55409164 | 0.00915188 | 0.49108521 |
| 0.53020605 | 1.44413544 | 1.775081074                          | 0.444135441                          | 0.48005681 | 0.02763346 | 0.49061003 |
| 0.28410876 | 1.21765781 | 0.565828689                          | 0.217657807                          | 0.53544799 | 0.01236741 | 0.48780302 |
| 0.59928503 | 1.5149656  | 3.671060738                          | 0.514965599                          | 0.60930288 | 0.00336817 | 0.48699293 |
| 0.32868114 | 1.25586478 | 0.91359309                           | 0.255864784                          | 0.55391171 | 0.00917926 | 0.47960708 |
| 0.42302149 | 1.34073256 | -0.605730119                         | 0.34073256                           | -0.535448  | 0.01236741 | -0.474698  |
| 0.55705539 | 1.47126323 | 1.796893169                          | 0.471263227                          | 0.49852054 | 0.02143549 | 0.47368483 |
| 0.83252031 | 1.78079359 | 4.955510468                          | 0.780793592                          | 0.46159309 | 0.03517097 | 0.47223005 |
| 0.55370625 | 1.46785174 | -0.686025607                         | 0.467851736                          | -0.4615931 | 0.03517097 | -0.4714819 |
| 0.20438509 | 1.15219515 | -0.257502914                         | 0.152195149                          | -0.415839  | 0.06081117 | -0.4699208 |
| 0.511171   | 1.42520653 | 2.174980942                          | 0.425206528                          | 0.46159309 | 0.03517097 | 0.4653491  |
| 0.28768873 | 1.22068312 | 0.871993902                          | 0.220683117                          | 0.46159309 | 0.03517097 | 0.46485664 |
| 1.0852099  | 2.12168415 | 3.19889574                           | 1.121684148                          | 0.3877382  | 0.08243519 | 0.46127618 |

|            |            |              |             |            |            |            |
|------------|------------|--------------|-------------|------------|------------|------------|
| 0.27102428 | 1.20666423 | 0.387671436  | 0.206664228 | 0.40646594 | 0.06747857 | 0.46020664 |
| 0.65936401 | 1.57938622 | 3.34541048   | 0.579386219 | 0.55391171 | 0.00917926 | 0.45972443 |
| 0.39937613 | 1.31893744 | 1.572421495  | 0.318937439 | 0.51698426 | 0.01640182 | 0.4560586  |
| 0.36614368 | 1.28890299 | 1.219811254  | 0.28890299  | 0.53544799 | 0.01236741 | 0.45460483 |
| 0.38878767 | 1.30929271 | 1.482997339  | 0.309292711 | 0.53562192 | 0.01233366 | 0.4539502  |
| 0.79135728 | 1.73070194 | 3.888809135  | 0.730701935 | 0.49852054 | 0.02143549 | 0.45233143 |
| 0.75617011 | 1.68900092 | 2.756579299  | 0.68900092  | 0.46159309 | 0.03517097 | 0.44106993 |
| 0.34890756 | 1.27359587 | 1.290568138  | 0.273595866 | 0.39709901 | 0.07467888 | 0.4404019  |
| 0.64932883 | 1.56843836 | 1.962729114  | 0.568438357 | 0.44312937 | 0.04423114 | 0.4353341  |
| 0.22180584 | 1.16619241 | 0.566422417  | 0.166192413 | 0.49852054 | 0.02143549 | 0.4346391  |
| 0.14662665 | 1.10697808 | -0.229738957 | 0.10697808  | -0.4800568 | 0.02763346 | -0.4319855 |
| 0.54745657 | 1.46150683 | 2.602537789  | 0.461506825 | 0.49852054 | 0.02143549 | 0.43040683 |

---

| Pearson_p  | kNN Cluster<br>(of 10) | MDA Rank in<br>kNN Cluster | Mean<br>MDA/kNN<br>Cluster | K-Means<br>Cluster (of<br>10) | Random<br>Forest MDA<br>(5000 trees) | Random<br>Forest Rank |
|------------|------------------------|----------------------------|----------------------------|-------------------------------|--------------------------------------|-----------------------|
| 2.9295E-06 | 4                      | 1                          | 0.0007344                  | 4                             | 0.0049772                            | 1                     |
| 0.00011745 | 4                      | 4                          | 0.0007344                  | 4                             | 0.00085881                           | 29                    |
| 0.00016498 | 4                      | 2                          | 0.0007344                  | 4                             | 0.0031442                            | 4                     |
| 0.00016845 | 3                      | 1                          | 0.00033721                 | 3                             | 0.0037711                            | 2                     |
| 0.00057525 | 3                      | 3                          | 0.00033721                 | 3                             | 0.0020749                            | 10                    |
| 0.00079285 | 4                      | 3                          | 0.0007344                  | 4                             | 0.0010836                            | 26                    |
| 0.00091572 | 3                      | 2                          | 0.00033721                 | 8                             | 0.0027521                            | 8                     |
| 0.00141426 | 1                      | 5                          | 0.00023685                 | 4                             | 0.0026253                            | 9                     |
| 0.00153076 | 1                      | 2                          | 0.00023685                 | 1                             | 0.0028762                            | 5                     |
| 0.00269513 | 1                      | 4                          | 0.00023685                 | 4                             | 0.0027619                            | 7                     |
| 0.00319935 | 3                      | 5                          | 0.00033721                 | 3                             | 0.0015228                            | 15                    |
| 0.00464138 | 3                      | 6                          | 0.00033721                 | 3                             | 0.0013809                            | 18                    |
| 0.00564018 | 2                      | 1                          | 9.3739E-05                 | 2                             | 0.001924                             | 11                    |
| 0.00792466 | 1                      | 3                          | 0.00023685                 | 1                             | 0.0028357                            | 6                     |
| 0.00886238 | 8                      | 2                          | 0.0002152                  | 8                             | 0.0010858                            | 25                    |
| 0.00909006 | 3                      | 9                          | 0.00033721                 | 3                             | 0.00055105                           | 39                    |
| 0.00944914 | 1                      | 37                         | 0.00023685                 | 1                             | 0.00011405                           | 124                   |
| 0.01070504 | 1                      | 10                         | 0.00023685                 | 1                             | 0.00084476                           | 30                    |
| 0.01222138 | 8                      | 6                          | 0.0002152                  | 8                             | 0.00045302                           | 51                    |
| 0.0127581  | 1                      | 1                          | 0.00023685                 | 3                             | 0.0035895                            | 3                     |
| 0.01445597 | 5                      | 2                          | 0.00014449                 | 5                             | 0.0010888                            | 24                    |
| 0.01523792 | 8                      | 1                          | 0.0002152                  | 8                             | 0.0014461                            | 17                    |
| 0.01557614 | 1                      | 7                          | 0.00023685                 | 1                             | 0.0016999                            | 13                    |
| 0.01602317 | 8                      | 5                          | 0.0002152                  | 8                             | 0.0005169                            | 45                    |
| 0.01698436 | 1                      | 11                         | 0.00023685                 | 1                             | 0.00077167                           | 33                    |
| 0.01787154 | 1                      | 17                         | 0.00023685                 | 1                             | 0.00043841                           | 52                    |
| 0.01912347 | 1                      | 6                          | 0.00023685                 | 1                             | 0.001868                             | 12                    |
| 0.02378174 | 6                      | 1                          | 0.00010891                 | 6                             | 0.0012369                            | 20                    |
| 0.02393836 | 4                      | 5                          | 0.0007344                  | 4                             | 0.00063745                           | 36                    |
| 0.02488038 | 1                      | 8                          | 0.00023685                 | 4                             | 0.0014596                            | 16                    |
| 0.02515765 | 5                      | 1                          | 0.00014449                 | 3                             | 0.0013369                            | 19                    |
| 0.02780041 | 3                      | 4                          | 0.00033721                 | 3                             | 0.0016616                            | 14                    |
| 0.02967513 | 2                      | 4                          | 9.3739E-05                 | 2                             | 0.00057921                           | 38                    |
| 0.0300742  | 8                      | 4                          | 0.0002152                  | 10                            | 0.00052168                           | 44                    |
| 0.03065458 | 1                      | 28                         | 0.00023685                 | 1                             | 0.00015452                           | 102                   |
| 0.03095647 | 7                      | 3                          | 0.00011122                 | 7                             | 0.00034279                           | 63                    |
| 0.03159394 | 5                      | 8                          | 0.00014449                 | 5                             | 5.0476E-05                           | 168                   |
| 0.03352032 | 1                      | 20                         | 0.00023685                 | 1                             | 0.00024881                           | 73                    |
| 0.03373321 | 8                      | 8                          | 0.0002152                  | 8                             | 0.00024644                           | 75                    |
| 0.0353131  | 6                      | 7                          | 0.00010891                 | 6                             | 0.00034365                           | 62                    |

|            |   |    |            |   |            |     |
|------------|---|----|------------|---|------------|-----|
| 0.03579611 | 8 | 3  | 0.0002152  | 8 | 0.00094032 | 28  |
| 0.03601556 | 1 | 16 | 0.00023685 | 3 | 0.00046278 | 50  |
| 0.03771846 | 1 | 15 | 0.00023685 | 1 | 0.00046817 | 49  |
| 0.03841093 | 3 | 12 | 0.00033721 | 3 | 0.0002654  | 71  |
| 0.03872597 | 1 | 26 | 0.00023685 | 4 | 0.00016841 | 95  |
| 0.03951366 | 1 | 70 | 0.00023685 | 6 | 0.00001873 | 204 |
| 0.04534428 | 6 | 12 | 0.00010891 | 6 | 0.0001369  | 111 |
| 0.04570997 | 1 | 36 | 0.00023685 | 4 | 0.00011532 | 121 |
| 0.04855892 | 6 | 10 | 0.00010891 | 6 | 0.00015484 | 101 |
| 0.04896007 | 2 | 9  | 9.3739E-05 | 9 | 0.00021024 | 81  |
| 0.05051522 | 2 | 7  | 9.3739E-05 | 2 | 0.00030032 | 67  |
| 0.05145822 | 1 | 9  | 0.00023685 | 1 | 0.0011303  | 22  |

---
