# Supplementary material for: A Mutation in the Mitochondrial Aspartate/Glutamate Carrier Leads to a More Oxidizing Intramitochondrial Environment and an Inflammatory Myopathy in Dutch Shepherd Dogs
Source: PubMed Central journal article supplement — J Neuromuscul Dis. 2019 Oct 31;6(4):485–501. doi: 10.3233/JND-190421 (PMC6918910; doi:10.3233/jnd-190421), 2019-10-31
Supplement: jnd-6-jnd190421-s003.pdf [file jnd-6-jnd190421-s003.pdf]

| Sample Na Group    | 1,25-Dihyd | 1-Methylac | 1-Methylac | 1-Methylhi | 1-Methylni | 1-Pyrroline | 11,12-DiHE |
|--------------------|------------|------------|------------|------------|------------|-------------|------------|
| 169135_af Affected | N/A        | N/A        | 4.29E+06   | 3.38E+07   | N/A        | N/A         | N/A        |
| 172758_af Affected | N/A        | N/A        | 1.23E+07   | 4.82E+07   | N/A        | N/A         | N/A        |
| 177141_af Affected | N/A        | N/A        | 6.01E+06   | 2.44E+07   | N/A        | N/A         | N/A        |
| 184773_af Affected | N/A        | N/A        | 4.15E+06   | 9.57E+06   | N/A        | N/A         | N/A        |
| 248322_af Affected | N/A        | N/A        | 9.43E+06   | 5.56E+07   | N/A        | N/A         | N/A        |
| 154191_cti Control | N/A        | N/A        | 7.44E+06   | 2.47E+07   | N/A        | N/A         | N/A        |
| 189890_cti Control | N/A        | N/A        | 4.35E+06   | 1.92E+07   | N/A        | N/A         | N/A        |
| 245123_cti Control | N/A        | N/A        | 1.28E+06   | 1.24E+06   | N/A        | N/A         | N/A        |
| 245517_cti Control | N/A        | N/A        | 5.13E+06   | 1.70E+07   | N/A        | N/A         | N/A        |
| 246915_cti Control | N/A        | N/A        | 4.38E+06   | 4.12E+06   | N/A        | N/A         | N/A        |
| 247052_cti Control | N/A        | N/A        | 2.38E+06   | 1.50E+07   | N/A        | N/A         | N/A        |
| 247053_cti Control | N/A        | N/A        | 8.39E+06   | 2.65E+07   | N/A        | N/A         | N/A        |
| 247447_cti Control | N/A        | N/A        | 7.54E+06   | 1.48E+07   | N/A        | N/A         | N/A        |
| 247536_cti Control | N/A        | N/A        | 1.82E+07   | 1.88E+07   | N/A        | N/A         | N/A        |
| 251490_cti Control | N/A        | N/A        | 7.18E+05   | 2.23E+06   | N/A        | N/A         | N/A        |
| 252758_cti Control | N/A        | N/A        | 1.03E+06   | 3.80E+06   | N/A        | N/A         | N/A        |
| 253842_cti Control | N/A        | N/A        | 1.47E+06   | 3.17E+06   | N/A        | N/A         | N/A        |
| 253843_cti Control | N/A        | N/A        | 2.34E+06   | 9.31E+06   | N/A        | N/A         | N/A        |
| 254517_cti Control | N/A        | N/A        | 6.08E+06   | 2.25E+07   | N/A        | N/A         | N/A        |
| 254664_cti Control | N/A        | N/A        | 1.60E+07   | 7.78E+06   | N/A        | N/A         | N/A        |
| 254735_cti Control | N/A        | N/A        | 1.07E+06   | 3.81E+06   | N/A        | N/A         | N/A        |

| 11,12-Epo | 11-Dehydr | 11-HETE  | 12-HETE  | 13,14-Dihy | 13S-hydro | 14,15-DHE | 14,15-Epo | 15-HETE  |
|-----------|-----------|----------|----------|------------|-----------|-----------|-----------|----------|
| 9.51E+04  | N/A       | 1.68E+05 | 5.67E+06 | N/A        | 7.52E+06  | N/A       | 9.06E+04  | 1.25E+05 |
| 9.35E+05  | N/A       | 1.58E+06 | 1.77E+06 | N/A        | 4.70E+06  | N/A       | 5.18E+05  | 6.47E+05 |
| 6.75E+04  | N/A       | 1.40E+05 | 1.43E+05 | N/A        | 1.67E+06  | N/A       | 9.13E+04  | 1.10E+05 |
| 9.31E+04  | N/A       | 1.48E+05 | 7.62E+05 | N/A        | 5.39E+06  | N/A       | 3.64E+05  | 5.69E+05 |
| 6.00E+04  | N/A       | 9.17E+04 | 1.16E+06 | N/A        | 1.75E+06  | N/A       | 5.88E+04  | 6.75E+04 |
| 8.96E+04  | N/A       | 1.22E+05 | 6.35E+05 | N/A        | 2.71E+06  | N/A       | 4.95E+04  | 4.89E+04 |
| 1.75E+04  | N/A       | 3.88E+04 | 1.35E+05 | N/A        | 6.35E+05  | N/A       | 1.67E+04  | 2.09E+04 |
| 1.30E+06  | N/A       | 2.02E+06 | 1.13E+07 | N/A        | 1.89E+07  | N/A       | 1.04E+06  | 1.20E+06 |
| 3.96E+04  | N/A       | 6.93E+04 | 8.93E+05 | N/A        | 2.94E+06  | N/A       | 3.39E+04  | 4.55E+04 |
| 1.41E+06  | N/A       | 2.36E+06 | 1.85E+06 | N/A        | 2.12E+07  | N/A       | 1.01E+06  | 1.25E+06 |
| 4.94E+04  | N/A       | 9.30E+04 | 5.37E+05 | N/A        | 2.03E+06  | N/A       | 5.13E+04  | 5.18E+04 |
| 6.81E+04  | N/A       | 1.54E+05 | 1.47E+06 | N/A        | 2.16E+06  | N/A       | 6.42E+04  | 1.11E+05 |
| 4.68E+04  | N/A       | 6.96E+04 | 3.12E+05 | N/A        | 6.42E+05  | N/A       | 3.30E+04  | 5.11E+04 |
| 1.16E+05  | N/A       | 2.00E+05 | 7.49E+05 | N/A        | 8.72E+05  | N/A       | 5.71E+04  | 9.82E+04 |
| 8.28E+04  | N/A       | 1.24E+05 | 1.09E+06 | N/A        | 5.13E+06  | N/A       | 5.66E+04  | 7.27E+04 |
| 1.30E+05  | N/A       | 1.68E+05 | 7.43E+06 | N/A        | 5.24E+07  | N/A       | 6.20E+04  | 1.08E+05 |
| 2.88E+04  | N/A       | 4.72E+04 | 6.01E+05 | N/A        | 2.82E+06  | N/A       | 1.70E+04  | 2.72E+04 |
| 7.84E+04  | N/A       | 1.11E+05 | 4.56E+05 | N/A        | 2.84E+06  | N/A       | 4.24E+04  | 5.94E+04 |
| 4.14E+04  | N/A       | 9.82E+04 | 2.42E+06 | N/A        | 4.67E+06  | N/A       | 4.61E+04  | 6.60E+04 |
| 3.35E+05  | N/A       | 5.23E+05 | 1.78E+07 | N/A        | 3.33E+07  | N/A       | 4.36E+05  | 5.04E+05 |
| 1.99E+05  | N/A       | 3.30E+05 | 4.29E+06 | N/A        | 7.20E+06  | N/A       | 1.93E+05  | 2.34E+05 |

2,3-Diphos 2-Arachido 2-Deoxygu. 2-Deoxyinc 2-Hydroxy- 2-Hydroxyξ 2-Isopropy 2-Keto-L-gl 2-Ketobuty

|          |          |     |     |          |          |     |          |          |
|----------|----------|-----|-----|----------|----------|-----|----------|----------|
| 3.51E+04 | 2.19E+05 | N/A | N/A | 5.46E+05 | 2.16E+06 | N/A | 1.47E+05 | 4.62E+07 |
| 6.09E+04 | 2.32E+05 | N/A | N/A | 2.61E+06 | 1.06E+06 | N/A | 6.21E+05 | 3.42E+07 |
| 1.02E+05 | 4.23E+05 | N/A | N/A | 4.41E+06 | 4.28E+06 | N/A | 2.03E+05 | 3.83E+07 |
| 2.60E+04 | 4.11E+04 | N/A | N/A | 8.92E+05 | 2.32E+06 | N/A | 2.93E+05 | 3.41E+07 |
| 3.95E+04 | 1.04E+05 | N/A | N/A | 8.62E+06 | 5.28E+06 | N/A | 1.56E+05 | 2.37E+07 |
| 3.39E+04 | 1.14E+05 | N/A | N/A | 6.65E+06 | 3.02E+07 | N/A | 1.61E+05 | 1.76E+07 |
| 1.54E+04 | 2.06E+05 | N/A | N/A | 5.42E+06 | 9.17E+06 | N/A | 1.14E+05 | 2.45E+07 |
| 3.21E+03 | 3.53E+05 | N/A | N/A | 8.33E+05 | 1.30E+06 | N/A | 7.26E+05 | 4.21E+07 |
| 6.88E+04 | 9.37E+04 | N/A | N/A | 1.88E+06 | 4.93E+06 | N/A | 1.89E+05 | 3.38E+07 |
| 1.12E+04 | 2.63E+03 | N/A | N/A | 4.39E+05 | 1.11E+06 | N/A | 2.81E+05 | 3.72E+07 |
| 3.71E+04 | 2.61E+05 | N/A | N/A | 1.26E+06 | 4.16E+06 | N/A | 1.33E+05 | 3.84E+07 |
| 8.13E+04 | 2.23E+05 | N/A | N/A | 2.30E+06 | 2.29E+06 | N/A | 4.49E+05 | 3.37E+07 |
| 1.50E+04 | 1.11E+05 | N/A | N/A | 1.64E+06 | 4.91E+06 | N/A | 5.62E+05 | 3.09E+07 |
| 3.60E+04 | 2.60E+04 | N/A | N/A | 5.34E+06 | 2.13E+06 | N/A | 3.71E+05 | 2.93E+07 |
| 2.88E+03 | 1.14E+05 | N/A | N/A | 2.35E+05 | 1.15E+06 | N/A | 1.59E+05 | 4.81E+07 |
| 3.70E+03 | 2.60E+03 | N/A | N/A | 2.22E+05 | 1.53E+06 | N/A | 8.31E+05 | 3.06E+07 |
| 7.17E+03 | 1.18E+05 | N/A | N/A | 2.73E+05 | 1.67E+06 | N/A | 6.01E+05 | 4.44E+07 |
| 1.58E+04 | 1.18E+05 | N/A | N/A | 1.25E+06 | 1.51E+06 | N/A | 2.56E+05 | 3.36E+07 |
| 8.48E+04 | 1.10E+05 | N/A | N/A | 2.37E+06 | 4.96E+06 | N/A | 1.55E+05 | 3.28E+07 |
| 3.19E+04 | 8.33E+04 | N/A | N/A | 6.41E+06 | 1.28E+06 | N/A | 2.76E+05 | 3.82E+07 |
| 8.76E+03 | 3.95E+04 | N/A | N/A | 2.73E+05 | 1.27E+06 | N/A | 1.99E+05 | 4.30E+07 |

2-Ketohexa 2-Methylci 2-Octenoyl 2-Picolinic 2-Pyrocate 20-Hydroxy 24,25-Dihy 24,25-Epo 3, 5-Tetrad

|     |          |          |          |     |          |     |     |          |
|-----|----------|----------|----------|-----|----------|-----|-----|----------|
| N/A | 2.19E+05 | 4.21E+07 | 4.95E+05 | N/A | 5.83E+06 | N/A | N/A | 1.35E+05 |
| N/A | 4.37E+05 | 2.10E+07 | 4.21E+05 | N/A | 3.68E+06 | N/A | N/A | 2.27E+05 |
| N/A | 5.62E+05 | 4.98E+06 | 3.86E+05 | N/A | 6.73E+05 | N/A | N/A | 1.12E+05 |
| N/A | 2.62E+05 | 4.86E+06 | 3.87E+05 | N/A | 1.97E+06 | N/A | N/A | 9.40E+04 |
| N/A | 4.34E+05 | 5.50E+07 | 3.34E+05 | N/A | 1.43E+06 | N/A | N/A | 4.45E+05 |
| N/A | 1.31E+05 | 1.07E+09 | 3.81E+05 | N/A | 8.35E+05 | N/A | N/A | 3.38E+06 |
| N/A | 2.62E+05 | 1.06E+08 | 4.09E+05 | N/A | 4.39E+05 | N/A | N/A | 3.69E+06 |
| N/A | 1.86E+05 | 3.57E+06 | 1.23E+06 | N/A | 1.75E+07 | N/A | N/A | 1.01E+05 |
| N/A | 2.14E+05 | 5.96E+08 | 3.41E+05 | N/A | 1.09E+06 | N/A | N/A | 3.62E+05 |
| N/A | 2.06E+05 | 8.30E+06 | 4.81E+05 | N/A | 8.86E+06 | N/A | N/A | 3.79E+05 |
| N/A | 1.50E+05 | 1.24E+08 | 4.16E+05 | N/A | 1.06E+06 | N/A | N/A | 1.14E+06 |
| N/A | 3.40E+05 | 2.07E+07 | 3.05E+05 | N/A | 1.68E+06 | N/A | N/A | 4.05E+05 |
| N/A | 2.88E+05 | 4.38E+08 | 4.77E+05 | N/A | 5.52E+05 | N/A | N/A | 1.54E+06 |
| N/A | 1.35E+05 | 1.29E+07 | 2.52E+05 | N/A | 1.66E+06 | N/A | N/A | 2.81E+05 |
| N/A | 1.18E+05 | 1.60E+06 | 6.59E+05 | N/A | 1.52E+06 | N/A | N/A | 1.08E+05 |
| N/A | 1.90E+05 | 8.38E+06 | 5.57E+05 | N/A | 7.63E+06 | N/A | N/A | 6.27E+05 |
| N/A | 1.67E+05 | 2.07E+07 | 5.22E+05 | N/A | 8.84E+05 | N/A | N/A | 3.66E+05 |
| N/A | 1.51E+05 | 1.48E+08 | 5.61E+05 | N/A | 7.88E+05 | N/A | N/A | 5.28E+05 |
| N/A | 1.56E+05 | 7.33E+08 | 3.46E+05 | N/A | 2.63E+06 | N/A | N/A | 8.17E+05 |
| N/A | 2.55E+05 | 1.21E+07 | 3.32E+05 | N/A | 1.71E+07 | N/A | N/A | 7.47E+05 |
| N/A | 1.61E+05 | 9.25E+06 | 8.19E+05 | N/A | 5.16E+06 | N/A | N/A | 2.05E+05 |

3-Aminoisc 3-Hydroxy- 3-Hydroxyç 3-Hydroxyç 3-Hydroxył 3-Hydroxył 3-Hydroxył 3-Hydroxył 3-Hydroxył 3-Hydroxył

|     |          |     |          |          |          |     |          |          |
|-----|----------|-----|----------|----------|----------|-----|----------|----------|
| N/A | 7.63E+05 | N/A | 6.45E+06 | 8.05E+07 | 1.90E+07 | N/A | 9.23E+07 | 2.95E+05 |
| N/A | 1.26E+06 | N/A | 3.50E+07 | 9.39E+07 | 3.44E+07 | N/A | 1.96E+08 | 8.31E+04 |
| N/A | 5.67E+05 | N/A | 3.55E+06 | 7.30E+07 | 2.19E+07 | N/A | 1.83E+08 | 2.32E+05 |
| N/A | 3.01E+05 | N/A | 3.65E+06 | 2.66E+07 | 9.65E+06 | N/A | 8.00E+07 | 4.91E+04 |
| N/A | 2.08E+06 | N/A | 2.79E+07 | 3.23E+08 | 2.09E+08 | N/A | 1.91E+08 | 2.19E+05 |
| N/A | 8.48E+07 | N/A | 1.84E+08 | 7.33E+08 | 7.41E+08 | N/A | 1.25E+08 | 4.23E+05 |
| N/A | 2.72E+07 | N/A | 1.32E+08 | 4.05E+08 | 3.95E+08 | N/A | 1.04E+08 | 1.09E+06 |
| N/A | 1.52E+05 | N/A | 4.72E+05 | 6.53E+06 | 2.77E+06 | N/A | 8.79E+05 | 2.22E+06 |
| N/A | 1.52E+06 | N/A | 2.80E+07 | 1.43E+08 | 7.08E+07 | N/A | 8.50E+07 | 4.59E+04 |
| N/A | 1.57E+06 | N/A | 1.37E+07 | 8.89E+07 | 6.08E+07 | N/A | 3.06E+07 | 9.38E+06 |
| N/A | 4.47E+06 | N/A | 7.77E+07 | 2.68E+08 | 2.74E+08 | N/A | 1.12E+08 | 4.06E+05 |
| N/A | 1.42E+07 | N/A | 4.87E+07 | 5.40E+08 | 3.27E+08 | N/A | 1.01E+08 | 7.96E+05 |
| N/A | 1.55E+07 | N/A | 4.91E+07 | 2.85E+08 | 2.03E+08 | N/A | 1.35E+08 | 9.99E+04 |
| N/A | 1.63E+06 | N/A | 1.92E+07 | 1.71E+08 | 4.63E+07 | N/A | 2.10E+08 | 2.89E+04 |
| N/A | 1.81E+05 | N/A | 1.15E+06 | 6.45E+06 | 2.30E+06 | N/A | 7.71E+06 | 2.64E+05 |
| N/A | 2.93E+07 | N/A | 5.25E+07 | 3.55E+08 | 4.57E+08 | N/A | 5.58E+07 | 1.78E+05 |
| N/A | 5.36E+06 | N/A | 5.31E+07 | 2.59E+08 | 2.34E+08 | N/A | 2.73E+07 | 6.88E+05 |
| N/A | 6.56E+06 | N/A | 5.20E+07 | 3.70E+08 | 3.14E+08 | N/A | 1.09E+08 | 5.31E+04 |
| N/A | 2.51E+06 | N/A | 3.84E+07 | 2.19E+08 | 1.40E+08 | N/A | 1.06E+08 | 2.70E+05 |
| N/A | 1.60E+07 | N/A | 7.78E+07 | 3.03E+08 | 2.53E+08 | N/A | 1.71E+08 | 9.61E+04 |
| N/A | 9.75E+05 | N/A | 7.70E+06 | 7.78E+07 | 2.04E+07 | N/A | 1.58E+07 | 1.08E+05 |

3-Hydroxy-3-Methylthio-3-Phospho-3-methylpentan-4,5-Dihydroxy-4-Hydroxy-4-Hydroxy-4-Hydroxy-4-Hydroxy-4-Hydroxy

|              |          |              |              |              |
|--------------|----------|--------------|--------------|--------------|
| 1.02E+06 N/A | 1.50E+06 | 3.13E+06 N/A | 9.85E+05 N/A | 3.51E+06 N/A |
| 1.28E+06 N/A | 6.72E+06 | 6.80E+05 N/A | 2.56E+06 N/A | 8.53E+06 N/A |
| 1.27E+06 N/A | 1.14E+06 | 2.67E+05 N/A | 3.81E+06 N/A | 7.44E+06 N/A |
| 5.09E+05 N/A | 1.01E+06 | 3.41E+05 N/A | 2.74E+06 N/A | 4.30E+06 N/A |
| 1.71E+07 N/A | 2.13E+05 | 9.49E+05 N/A | 3.65E+06 N/A | 1.38E+07 N/A |
| 5.02E+07 N/A | 2.98E+05 | 1.06E+06 N/A | 2.43E+06 N/A | 4.11E+06 N/A |
| 2.52E+07 N/A | 2.75E+06 | 2.84E+05 N/A | 4.66E+06 N/A | 3.58E+06 N/A |
| 2.34E+05 N/A | 9.17E+04 | 2.98E+06 N/A | 5.36E+05 N/A | 3.09E+05 N/A |
| 3.26E+06 N/A | 1.31E+06 | 6.01E+05 N/A | 1.66E+06 N/A | 4.54E+06 N/A |
| 3.72E+06 N/A | 1.00E+05 | 1.79E+05 N/A | 1.68E+06 N/A | 2.92E+06 N/A |
| 1.90E+07 N/A | 6.80E+05 | 4.68E+05 N/A | 1.26E+06 N/A | 2.06E+06 N/A |
| 2.24E+07 N/A | 2.35E+05 | 1.59E+06 N/A | 2.38E+06 N/A | 5.31E+06 N/A |
| 8.87E+06 N/A | 5.04E+05 | 2.83E+07 N/A | 2.09E+06 N/A | 5.99E+06 N/A |
| 1.83E+06 N/A | 1.28E+06 | 6.65E+07 N/A | 3.71E+06 N/A | 9.77E+06 N/A |
| 1.75E+05 N/A | 9.24E+04 | 2.17E+05 N/A | 1.06E+06 N/A | 6.47E+05 N/A |
| 2.67E+07 N/A | 6.66E+05 | 2.63E+05 N/A | 1.09E+06 N/A | 1.53E+06 N/A |
| 9.31E+06 N/A | 7.26E+05 | 1.83E+05 N/A | 1.20E+06 N/A | 1.11E+06 N/A |
| 1.98E+07 N/A | 1.08E+06 | 3.58E+05 N/A | 1.68E+06 N/A | 3.69E+06 N/A |
| 1.14E+07 N/A | 4.26E+05 | 1.21E+06 N/A | 2.14E+06 N/A | 4.54E+06 N/A |
| 1.15E+07 N/A | 4.25E+05 | 2.87E+05 N/A | 3.73E+06 N/A | 8.19E+06 N/A |
| 1.01E+06 N/A | 1.76E+05 | 3.83E+05 N/A | 3.96E+06 N/A | 2.03E+06 N/A |

| 4-Pyridoxic | 5,6-DHET | 5,6-trans-2 | 5-HETE   | 5-Hydroxy- | 5-Hydroxyi | 5-Methylte | 5-Methylth | 5-Thymidyl |
|-------------|----------|-------------|----------|------------|------------|------------|------------|------------|
| N/A         | N/A      | N/A         | 3.88E+04 | N/A        | N/A        | 2.43E+05   | 7.47E+06   | N/A        |
| N/A         | N/A      | N/A         | 1.40E+05 | N/A        | N/A        | 1.69E+03   | 6.71E+05   | N/A        |
| N/A         | N/A      | N/A         | 5.20E+04 | N/A        | N/A        | 8.38E+04   | 8.96E+06   | N/A        |
| N/A         | N/A      | N/A         | 3.25E+04 | N/A        | N/A        | 5.19E+03   | 4.33E+06   | N/A        |
| N/A         | N/A      | N/A         | 4.99E+04 | N/A        | N/A        | 5.80E+04   | 4.64E+06   | N/A        |
| N/A         | N/A      | N/A         | 2.74E+04 | N/A        | N/A        | 2.09E+03   | 1.13E+06   | N/A        |
| N/A         | N/A      | N/A         | 1.91E+04 | N/A        | N/A        | 2.42E+03   | 9.41E+06   | N/A        |
| N/A         | N/A      | N/A         | 7.26E+05 | N/A        | N/A        | 5.49E+02   | 3.18E+05   | N/A        |
| N/A         | N/A      | N/A         | 2.59E+04 | N/A        | N/A        | 1.36E+03   | 7.74E+06   | N/A        |
| N/A         | N/A      | N/A         | 8.81E+05 | N/A        | N/A        | 1.24E+03   | 3.39E+05   | N/A        |
| N/A         | N/A      | N/A         | 7.45E+04 | N/A        | N/A        | 1.06E+03   | 8.43E+06   | N/A        |
| N/A         | N/A      | N/A         | 6.44E+04 | N/A        | N/A        | 1.25E+04   | 4.91E+05   | N/A        |
| N/A         | N/A      | N/A         | 3.49E+04 | N/A        | N/A        | 2.18E+03   | 5.96E+06   | N/A        |
| N/A         | N/A      | N/A         | 9.18E+04 | N/A        | N/A        | 1.52E+03   | 1.68E+06   | N/A        |
| N/A         | N/A      | N/A         | 1.12E+05 | N/A        | N/A        | 7.67E+02   | 6.17E+05   | N/A        |
| N/A         | N/A      | N/A         | 5.91E+04 | N/A        | N/A        | 1.12E+03   | 1.21E+06   | N/A        |
| N/A         | N/A      | N/A         | 2.29E+04 | N/A        | N/A        | 1.57E+03   | 1.74E+06   | N/A        |
| N/A         | N/A      | N/A         | 7.03E+04 | N/A        | N/A        | 1.22E+03   | 6.03E+06   | N/A        |
| N/A         | N/A      | N/A         | 2.84E+04 | N/A        | N/A        | 6.51E+02   | 2.28E+06   | N/A        |
| N/A         | N/A      | N/A         | 1.72E+05 | N/A        | N/A        | 2.23E+03   | 8.08E+05   | N/A        |
| N/A         | N/A      | N/A         | 1.15E+05 | N/A        | N/A        | 4.56E+02   | 1.21E+06   | N/A        |

5alpha-Chc 6-Phospho; 7-Dehydro; 7-Methylgl; 7-ketochol; 7-methylgl; 8,9-DiHETr; 8,9-Epoxye; 8-HETE

|     |          |     |     |     |          |     |          |          |
|-----|----------|-----|-----|-----|----------|-----|----------|----------|
| N/A | 1.01E+05 | N/A | N/A | N/A | 1.72E+06 | N/A | 1.94E+04 | 6.05E+04 |
| N/A | 7.30E+05 | N/A | N/A | N/A | 3.72E+06 | N/A | 5.88E+04 | 7.11E+04 |
| N/A | 5.92E+05 | N/A | N/A | N/A | 2.72E+06 | N/A | 2.41E+04 | 2.77E+04 |
| N/A | 9.87E+04 | N/A | N/A | N/A | 1.52E+06 | N/A | 2.39E+04 | 3.34E+04 |
| N/A | 4.18E+05 | N/A | N/A | N/A | 4.82E+06 | N/A | 1.57E+04 | 3.07E+04 |
| N/A | 2.47E+05 | N/A | N/A | N/A | 3.05E+06 | N/A | 2.67E+04 | 2.43E+04 |
| N/A | 3.26E+05 | N/A | N/A | N/A | 2.78E+06 | N/A | 2.14E+04 | 2.22E+04 |
| N/A | 1.16E+04 | N/A | N/A | N/A | 2.38E+05 | N/A | 2.51E+05 | 5.38E+05 |
| N/A | 5.03E+05 | N/A | N/A | N/A | 2.20E+06 | N/A | 1.06E+04 | 2.34E+04 |
| N/A | 3.69E+04 | N/A | N/A | N/A | 1.24E+06 | N/A | 2.96E+05 | 4.85E+05 |
| N/A | 1.44E+05 | N/A | N/A | N/A | 1.94E+06 | N/A | 1.11E+04 | 3.20E+04 |
| N/A | 2.76E+05 | N/A | N/A | N/A | 4.14E+06 | N/A | 2.09E+04 | 3.00E+04 |
| N/A | 1.53E+05 | N/A | N/A | N/A | 3.09E+06 | N/A | 2.70E+04 | 3.65E+04 |
| N/A | 1.45E+05 | N/A | N/A | N/A | 6.66E+06 | N/A | 3.51E+04 | 4.68E+04 |
| N/A | 3.63E+04 | N/A | N/A | N/A | 4.66E+05 | N/A | 2.40E+04 | 2.68E+04 |
| N/A | 9.53E+04 | N/A | N/A | N/A | 7.01E+05 | N/A | 3.87E+04 | 8.92E+04 |
| N/A | 4.66E+04 | N/A | N/A | N/A | 4.77E+05 | N/A | 2.00E+04 | 2.18E+04 |
| N/A | 1.38E+05 | N/A | N/A | N/A | 1.50E+06 | N/A | 2.40E+04 | 2.48E+04 |
| N/A | 2.29E+05 | N/A | N/A | N/A | 2.56E+06 | N/A | 2.73E+04 | 2.65E+04 |
| N/A | 4.47E+04 | N/A | N/A | N/A | 3.83E+06 | N/A | 8.84E+04 | 2.58E+05 |
| N/A | 5.54E+04 | N/A | N/A | N/A | 6.24E+05 | N/A | 5.52E+04 | 1.09E+05 |



| 8-Hydroxy-8-hydroxyg | 9-Decenoy | 9-HETE   | 9-Hexadeci | AICAR    | Acetic acid | Acetoaceti | Acetyl-CoA        |
|----------------------|-----------|----------|------------|----------|-------------|------------|-------------------|
| N/A                  | N/A       | 3.67E+06 | 7.49E+04   | 3.16E+05 | 2.86E+07    | N/A        | 6.44E+07 1.29E+05 |
| N/A                  | N/A       | 3.52E+06 | 8.86E+04   | 4.32E+05 | 9.20E+07    | N/A        | 5.05E+07 1.86E+04 |
| N/A                  | N/A       | 1.17E+06 | 2.49E+04   | 9.06E+05 | 1.22E+07    | N/A        | 5.59E+07 7.62E+05 |
| N/A                  | N/A       | 1.46E+06 | 3.32E+04   | 1.85E+05 | 3.18E+06    | N/A        | 4.97E+07 2.60E+05 |
| N/A                  | N/A       | 1.15E+07 | 2.89E+04   | 4.96E+06 | 2.23E+07    | N/A        | 3.47E+07 3.11E+04 |
| N/A                  | N/A       | 1.04E+08 | 3.41E+04   | 2.59E+07 | 1.21E+06    | N/A        | 2.73E+07 1.38E+05 |
| N/A                  | N/A       | 5.48E+07 | 2.00E+04   | 1.88E+07 | 3.29E+05    | N/A        | 3.56E+07 2.06E+05 |
| N/A                  | N/A       | 3.27E+05 | 4.48E+05   | 1.66E+05 | 9.05E+04    | N/A        | 6.21E+07 1.97E+03 |
| N/A                  | N/A       | 1.77E+07 | 3.05E+04   | 1.99E+06 | 3.42E+06    | N/A        | 4.97E+07 8.61E+04 |
| N/A                  | N/A       | 3.12E+06 | 3.65E+05   | 3.27E+05 | 8.85E+05    | N/A        | 5.26E+07 3.61E+03 |
| N/A                  | N/A       | 1.87E+07 | 2.81E+04   | 2.08E+07 | 2.13E+06    | N/A        | 5.22E+07 2.49E+05 |
| N/A                  | N/A       | 4.71E+06 | 4.10E+04   | 1.95E+06 | 2.40E+06    | N/A        | 4.78E+07 1.12E+05 |
| N/A                  | N/A       | 3.40E+07 | 3.80E+04   | 2.50E+06 | 5.80E+06    | N/A        | 4.46E+07 3.46E+05 |
| N/A                  | N/A       | 5.69E+06 | 5.78E+04   | 4.94E+05 | 4.73E+07    | N/A        | 4.29E+07 1.13E+06 |
| N/A                  | N/A       | 5.02E+05 | 5.22E+04   | 1.35E+05 | 6.23E+05    | N/A        | 6.85E+07 4.15E+03 |
| N/A                  | N/A       | 4.75E+06 | 1.07E+05   | 1.14E+06 | 3.89E+04    | N/A        | 4.19E+07 1.27E+04 |
| N/A                  | N/A       | 6.57E+06 | 2.22E+04   | 1.48E+06 | 1.22E+06    | N/A        | 6.51E+07 1.63E+05 |
| N/A                  | N/A       | 1.48E+07 | 2.69E+04   | 3.79E+06 | 1.33E+06    | N/A        | 4.85E+07 2.52E+05 |
| N/A                  | N/A       | 3.15E+07 | 4.21E+04   | 3.90E+06 | 5.02E+06    | N/A        | 4.85E+07 2.26E+04 |
| N/A                  | N/A       | 7.11E+06 | 3.64E+05   | 1.34E+06 | 2.18E+07    | N/A        | 5.21E+07 2.67E+04 |
| N/A                  | N/A       | 1.90E+06 | 9.05E+04   | 2.71E+05 | 1.51E+06    | N/A        | 6.16E+07 5.97E+03 |

| Acetylcholi | Adenine  | Adenosine | Adenosine | Adenosine | Adenosine | Adenosine | Adenylsucc | Adipic acid |
|-------------|----------|-----------|-----------|-----------|-----------|-----------|------------|-------------|
| 8.11E+05    | 6.00E+07 | 1.31E+08  | 2.00E+07  | 4.86E+07  | N/A       | 6.67E+05  | N/A        | 7.74E+05    |
| 6.21E+05    | 5.01E+07 | 1.47E+07  | 7.58E+05  | 5.54E+06  | N/A       | 2.85E+05  | N/A        | 5.06E+05    |
| 1.64E+06    | 5.66E+07 | 8.19E+07  | 3.04E+07  | 7.36E+07  | N/A       | 1.32E+06  | N/A        | 4.88E+05    |
| 4.90E+05    | 5.39E+07 | 1.24E+08  | 1.95E+07  | 2.72E+07  | N/A       | 9.87E+05  | N/A        | 5.88E+05    |
| 9.39E+05    | 4.40E+07 | 8.61E+06  | 3.83E+06  | 5.33E+07  | N/A       | 2.43E+05  | N/A        | 5.91E+05    |
| 1.96E+06    | 4.74E+07 | 6.40E+07  | 5.34E+06  | 6.68E+07  | N/A       | 7.05E+05  | N/A        | 4.66E+05    |
| 6.61E+06    | 5.11E+07 | 1.13E+08  | 3.46E+07  | 1.24E+08  | N/A       | 2.26E+07  | N/A        | 4.90E+05    |
| 6.61E+05    | 6.64E+07 | 4.39E+07  | 8.34E+06  | 7.85E+06  | N/A       | 4.69E+04  | N/A        | 5.62E+05    |
| 1.13E+06    | 5.74E+07 | 1.10E+08  | 2.40E+07  | 8.00E+07  | N/A       | 1.21E+06  | N/A        | 6.39E+05    |
| 1.50E+05    | 5.77E+07 | 4.48E+07  | 9.09E+06  | 6.21E+06  | N/A       | 1.30E+05  | N/A        | 5.09E+05    |
| 1.09E+06    | 5.19E+07 | 3.73E+07  | 3.25E+07  | 4.99E+07  | N/A       | 1.15E+06  | N/A        | 5.86E+05    |
| 1.27E+06    | 5.48E+07 | 2.75E+07  | 1.36E+06  | 1.88E+07  | N/A       | 2.24E+05  | N/A        | 4.54E+05    |
| 7.30E+05    | 4.60E+07 | 1.06E+08  | 1.95E+07  | 7.05E+07  | N/A       | 1.40E+06  | N/A        | 4.58E+05    |
| 5.00E+06    | 3.57E+07 | 7.91E+07  | 1.97E+07  | 5.23E+07  | N/A       | 2.74E+06  | N/A        | 5.19E+05    |
| 8.42E+05    | 5.94E+07 | 8.69E+06  | 6.22E+05  | 1.48E+06  | N/A       | 2.25E+04  | N/A        | 5.13E+05    |
| 2.57E+05    | 6.29E+07 | 2.10E+06  | 3.57E+07  | 1.72E+07  | N/A       | 1.66E+06  | N/A        | 5.98E+05    |
| 7.84E+05    | 5.65E+07 | 1.04E+08  | 2.49E+07  | 3.73E+07  | N/A       | 1.23E+06  | N/A        | 5.07E+05    |
| 2.06E+06    | 5.52E+07 | 1.86E+07  | 5.02E+06  | 2.42E+07  | N/A       | 1.54E+06  | N/A        | 4.86E+05    |
| 2.08E+06    | 4.61E+07 | 2.97E+07  | 1.26E+06  | 1.56E+07  | N/A       | 2.02E+05  | N/A        | 4.68E+05    |
| 6.93E+05    | 3.93E+07 | 2.23E+07  | 8.51E+05  | 4.13E+06  | N/A       | 1.45E+05  | N/A        | 5.02E+05    |
| 3.35E+05    | 6.28E+07 | 1.26E+07  | 9.52E+05  | 1.22E+06  | N/A       | 1.48E+05  | N/A        | 6.60E+05    |

| Adipoylcar | Agmatine | Alanine  | Aldosteron | Allantoic ac | Allantoin | Alpha-Tocc | Alpha-keto | Amino    | adip |
|------------|----------|----------|------------|--------------|-----------|------------|------------|----------|------|
| 6.03E+05   | N/A      | 1.83E+08 | N/A        | 1.77E+05     | 1.00E+06  | 8.05E+04   | N/A        | 6.78E+05 |      |
| 7.42E+05   | N/A      | 2.58E+08 | N/A        | 2.92E+05     | 1.64E+06  | 8.68E+04   | N/A        | 8.24E+05 |      |
| 7.99E+05   | N/A      | 2.58E+08 | N/A        | 2.73E+05     | 1.08E+06  | 5.22E+05   | N/A        | 1.04E+06 |      |
| 4.18E+05   | N/A      | 1.98E+08 | N/A        | 2.41E+05     | 6.37E+05  | 8.99E+04   | N/A        | 5.99E+05 |      |
| 7.29E+05   | N/A      | 2.71E+08 | N/A        | 4.26E+05     | 1.97E+06  | 2.54E+05   | N/A        | 9.66E+05 |      |
| 9.82E+05   | N/A      | 2.19E+08 | N/A        | 4.10E+05     | 9.06E+05  | 7.59E+05   | N/A        | 1.68E+06 |      |
| 1.44E+06   | N/A      | 3.00E+08 | N/A        | 1.42E+05     | 5.58E+05  | 9.13E+05   | N/A        | 3.06E+05 |      |
| 3.96E+05   | N/A      | 9.82E+06 | N/A        | 3.82E+04     | 2.27E+04  | 5.01E+04   | N/A        | 9.27E+05 |      |
| 6.71E+05   | N/A      | 2.59E+08 | N/A        | 2.29E+05     | 8.80E+05  | 8.03E+04   | N/A        | 4.80E+05 |      |
| 4.25E+05   | N/A      | 8.89E+07 | N/A        | 6.41E+04     | 2.62E+05  | 4.22E+04   | N/A        | 4.07E+05 |      |
| 8.72E+05   | N/A      | 2.54E+08 | N/A        | 1.60E+05     | 6.60E+05  | 4.28E+05   | N/A        | 4.68E+05 |      |
| 8.10E+05   | N/A      | 2.94E+08 | N/A        | 3.51E+05     | 1.67E+06  | 1.94E+05   | N/A        | 4.54E+05 |      |
| 9.35E+05   | N/A      | 2.92E+08 | N/A        | 2.86E+05     | 8.35E+05  | 1.13E+05   | N/A        | 3.47E+05 |      |
| 7.53E+05   | N/A      | 2.93E+08 | N/A        | 4.32E+05     | 1.35E+06  | 1.30E+05   | N/A        | 2.92E+05 |      |
| 4.81E+05   | N/A      | 4.08E+07 | N/A        | 4.81E+04     | 1.59E+05  | 7.23E+04   | N/A        | 5.54E+05 |      |
| 4.69E+05   | N/A      | 1.36E+08 | N/A        | 3.91E+04     | 4.71E+05  | 3.72E+04   | N/A        | 6.16E+05 |      |
| 7.31E+05   | N/A      | 1.47E+08 | N/A        | 1.14E+05     | 2.82E+05  | 5.55E+04   | N/A        | 3.35E+05 |      |
| 6.60E+05   | N/A      | 2.33E+08 | N/A        | 8.12E+04     | 4.95E+05  | 8.31E+04   | N/A        | 4.56E+05 |      |
| 8.81E+05   | N/A      | 2.81E+08 | N/A        | 3.45E+05     | 1.19E+06  | 6.58E+04   | N/A        | 4.27E+05 |      |
| 7.74E+05   | N/A      | 2.59E+08 | N/A        | 1.21E+05     | 5.28E+05  | 7.20E+04   | N/A        | 7.20E+05 |      |
| 5.48E+05   | N/A      | 9.36E+07 | N/A        | 1.54E+05     | 2.90E+05  | 3.67E+04   | N/A        | 7.24E+05 |      |

| Anandamic | Androsterc | Arachidoni | Arachidony | Arginine | Argininosu | Aspartylgly | Azelaic acic | B-Carotene |
|-----------|------------|------------|------------|----------|------------|-------------|--------------|------------|
| N/A       | 5.02E+05   | 1.86E+07   | 1.76E+06   | 1.88E+07 | 3.41E+05   | 2.18E+05    | 2.02E+06     | N/A        |
| N/A       | 5.25E+05   | 5.74E+07   | 6.29E+06   | 3.14E+07 | 1.05E+06   | 2.76E+05    | 1.66E+06     | N/A        |
| N/A       | 5.29E+05   | 2.03E+07   | 3.85E+06   | 6.28E+07 | 1.27E+06   | 2.21E+05    | 2.21E+06     | N/A        |
| N/A       | 3.84E+05   | 1.36E+07   | 9.99E+05   | 2.30E+07 | 3.13E+05   | 1.04E+05    | 2.37E+06     | N/A        |
| N/A       | 5.25E+05   | 2.03E+07   | 3.43E+07   | 2.95E+07 | 1.24E+06   | 3.94E+05    | 1.59E+06     | N/A        |
| N/A       | 4.39E+05   | 1.62E+07   | 3.42E+07   | 2.59E+07 | 1.73E+06   | 3.99E+05    | 1.77E+06     | N/A        |
| N/A       | 4.66E+05   | 4.84E+06   | 4.09E+07   | 2.74E+07 | 1.01E+06   | 3.62E+05    | 1.70E+06     | N/A        |
| N/A       | 4.82E+05   | 7.37E+07   | 1.50E+06   | 7.14E+05 | 1.57E+04   | 8.81E+03    | 3.60E+06     | N/A        |
| N/A       | 4.04E+05   | 1.14E+07   | 1.25E+07   | 1.95E+07 | 6.08E+05   | 1.97E+05    | 3.24E+06     | N/A        |
| N/A       | 4.00E+05   | 4.30E+07   | 4.62E+06   | 8.84E+06 | 1.39E+05   | 1.65E+04    | 3.35E+06     | N/A        |
| N/A       | 4.19E+05   | 1.43E+07   | 4.34E+07   | 1.24E+07 | 2.68E+05   | 2.35E+05    | 1.76E+06     | N/A        |
| N/A       | 5.18E+05   | 2.76E+07   | 2.14E+07   | 1.63E+07 | 5.08E+05   | 2.77E+05    | 2.47E+06     | N/A        |
| N/A       | 5.13E+05   | 2.41E+07   | 2.60E+07   | 9.02E+06 | 3.99E+05   | 2.17E+05    | 2.27E+06     | N/A        |
| N/A       | 3.91E+05   | 4.62E+07   | 6.97E+06   | 4.25E+07 | 4.28E+05   | 2.07E+05    | 2.23E+06     | N/A        |
| N/A       | 4.51E+05   | 2.05E+07   | 3.81E+05   | 5.04E+06 | 8.75E+03   | 4.18E+04    | 2.63E+06     | N/A        |
| N/A       | 4.41E+05   | 1.49E+07   | 2.71E+06   | 4.36E+06 | 9.07E+04   | 8.17E+04    | 3.02E+06     | N/A        |
| N/A       | 4.41E+05   | 1.80E+07   | 5.44E+06   | 3.76E+06 | 1.18E+05   | 9.60E+04    | 2.33E+06     | N/A        |
| N/A       | 3.61E+05   | 2.31E+07   | 1.02E+07   | 7.01E+06 | 2.36E+05   | 1.44E+05    | 2.11E+06     | N/A        |
| N/A       | 4.54E+05   | 1.53E+07   | 3.10E+07   | 2.80E+07 | 6.97E+05   | 2.84E+05    | 2.53E+06     | N/A        |
| N/A       | 4.34E+05   | 5.20E+07   | 2.41E+07   | 6.42E+07 | 3.93E+05   | 1.63E+05    | 2.66E+06     | N/A        |
| N/A       | 5.59E+05   | 4.77E+07   | 1.55E+06   | 7.22E+06 | 2.17E+05   | 3.94E+04    | 4.06E+06     | N/A        |

| BMP(16:0/ | BMP(18:1/ |
|-----------|-----------|-----------|-----------|-----------|-----------|-----------|-----------|-----------|
| 7.70E+05  | 1.65E+06  | 1.28E+05  | 1.07E+05  | 1.31E+06  | 9.38E+05  | 1.01E+05  | 9.83E+04  | 3.27E+05  |
| 7.13E+05  | 1.75E+06  | 8.79E+04  | 9.72E+04  | 7.89E+05  | 6.31E+05  | 7.66E+04  | 8.54E+04  | 8.34E+04  |
| 1.01E+06  | 2.22E+06  | 3.26E+05  | 4.80E+04  | 1.29E+05  | 1.78E+05  | 3.25E+04  | 3.38E+04  | 8.37E+04  |
| 9.72E+05  | 2.28E+06  | 8.46E+04  | 6.79E+04  | 1.87E+05  | 1.83E+05  | 4.22E+04  | 3.23E+04  | 3.94E+04  |
| 4.98E+05  | 4.39E+05  | 3.88E+04  | 2.89E+04  | 5.60E+04  | 5.14E+04  | 9.79E+03  | 8.91E+03  | 2.26E+04  |
| 6.61E+05  | 1.06E+06  | 6.72E+04  | 2.96E+04  | 1.55E+05  | 1.05E+05  | 2.61E+04  | 1.30E+04  | 4.44E+04  |
| 1.31E+06  | 8.95E+05  | 8.93E+04  | 3.74E+04  | 1.29E+05  | 1.40E+05  | 1.86E+04  | 3.43E+04  | 1.02E+05  |
| 2.12E+05  | 2.21E+05  | 3.85E+04  | 3.13E+04  | 1.61E+05  | 2.02E+05  | 3.70E+04  | 5.62E+04  | 1.72E+05  |
| 5.47E+05  | 1.12E+06  | 2.91E+05  | 2.58E+04  | 1.47E+05  | 1.81E+05  | 2.70E+04  | 1.13E+04  | 4.56E+04  |
| 1.39E+06  | 1.15E+06  | 2.38E+05  | 7.29E+04  | 7.70E+04  | 1.43E+05  | 1.26E+05  | 3.42E+04  | 9.25E+04  |
| 1.98E+06  | 1.81E+06  | 9.21E+04  | 1.11E+05  | 1.64E+05  | 1.29E+05  | 2.22E+04  | 2.12E+04  | 5.17E+04  |
| 5.69E+05  | 6.61E+05  | 1.72E+05  | 3.03E+04  | 4.16E+04  | 8.22E+04  | 2.45E+04  | 1.56E+04  | 2.56E+04  |
| 8.27E+05  | 1.04E+06  | 1.11E+05  | 2.16E+04  | 1.03E+05  | 7.27E+04  | 3.67E+04  | 1.71E+04  | 2.41E+04  |
| 1.83E+06  | 1.12E+06  | 1.24E+05  | 3.02E+04  | 5.44E+04  | 8.12E+04  | 1.61E+04  | 1.24E+04  | 3.36E+04  |
| 6.17E+05  | 8.29E+05  | 1.15E+05  | 2.31E+04  | 4.48E+04  | 7.73E+04  | 1.94E+04  | 1.54E+04  | 3.32E+04  |
| 2.15E+06  | 1.42E+06  | 4.99E+05  | 4.68E+04  | 1.05E+05  | 1.48E+05  | 4.04E+04  | 3.11E+04  | 9.82E+04  |
| 4.45E+05  | 1.20E+06  | 1.19E+05  | 1.16E+05  | 1.65E+06  | 8.98E+05  | 4.59E+04  | 8.25E+04  | 8.42E+04  |
| 7.43E+05  | 1.30E+06  | 8.66E+04  | 5.14E+04  | 1.72E+05  | 1.22E+05  | 3.20E+04  | 2.71E+04  | 2.86E+04  |
| 4.45E+05  | 8.59E+05  | 2.51E+05  | 2.63E+04  | 1.05E+05  | 1.17E+05  | 1.59E+04  | 1.50E+04  | 3.29E+04  |
| 9.10E+05  | 1.87E+06  | 9.11E+04  | 3.97E+04  | 1.23E+05  | 1.69E+05  | 4.36E+04  | 1.76E+04  | 1.99E+04  |
| 1.47E+06  | 9.12E+05  | 4.30E+04  | 3.04E+04  | 5.46E+04  | 5.96E+04  | 2.17E+04  | 1.28E+04  | 2.13E+04  |

| BMP(20:4/ | BMP(22:5/ | BMP(22:6/ | Benzoic aci | Betaine  | Betaine ald | Biotin | Butyrylcarr | CDP-cholin |
|-----------|-----------|-----------|-------------|----------|-------------|--------|-------------|------------|
| N/A       | N/A       | 5.39E+04  | 1.26E+07    | 6.03E+06 | 1.60E+07    | N/A    | 2.26E+08    | 1.15E+06   |
| N/A       | N/A       | 1.49E+04  | 1.91E+07    | 9.58E+06 | 3.45E+07    | N/A    | 6.58E+07    | 1.12E+06   |
| N/A       | N/A       | 8.38E+04  | 1.73E+07    | 6.94E+06 | 2.47E+07    | N/A    | 7.26E+08    | 1.40E+06   |
| N/A       | N/A       | 7.08E+03  | 2.76E+07    | 2.93E+06 | 1.29E+07    | N/A    | 1.43E+08    | 5.22E+05   |
| N/A       | N/A       | 1.73E+04  | 4.12E+07    | 9.70E+06 | 5.10E+07    | N/A    | 7.92E+08    | 2.35E+06   |
| N/A       | N/A       | 6.02E+03  | 2.41E+07    | 9.23E+06 | 5.40E+07    | N/A    | 3.68E+08    | 1.11E+06   |
| N/A       | N/A       | 1.74E+05  | 1.14E+07    | 3.55E+06 | 5.09E+07    | N/A    | 7.57E+08    | 1.56E+06   |
| N/A       | N/A       | 1.26E+05  | 2.66E+07    | 2.61E+05 | 1.90E+06    | N/A    | 6.98E+06    | 2.27E+04   |
| N/A       | N/A       | 3.08E+04  | 1.38E+07    | 5.07E+06 | 3.94E+07    | N/A    | 4.98E+08    | 1.41E+06   |
| N/A       | N/A       | 1.94E+04  | 8.70E+07    | 1.14E+06 | 2.54E+07    | N/A    | 3.59E+07    | 2.46E+04   |
| N/A       | N/A       | 8.92E+03  | 2.79E+07    | 3.04E+06 | 4.39E+07    | N/A    | 8.17E+08    | 8.23E+05   |
| N/A       | N/A       | 1.44E+04  | 1.70E+07    | 1.06E+07 | 3.58E+07    | N/A    | 4.44E+08    | 1.23E+06   |
| N/A       | N/A       | 2.48E+03  | 4.01E+07    | 6.04E+06 | 5.52E+07    | N/A    | 5.52E+08    | 1.24E+06   |
| N/A       | N/A       | 4.68E+04  | 4.01E+07    | 6.76E+06 | 3.00E+07    | N/A    | 3.72E+08    | 5.73E+05   |
| N/A       | N/A       | 5.53E+04  | 1.81E+07    | 5.03E+05 | 2.80E+06    | N/A    | 3.92E+07    | 3.62E+05   |
| N/A       | N/A       | 1.23E+05  | 1.05E+07    | 1.77E+06 | 1.92E+07    | N/A    | 4.45E+07    | 2.71E+05   |
| N/A       | N/A       | 3.64E+03  | 6.37E+07    | 2.35E+06 | 2.72E+07    | N/A    | 2.16E+08    | 6.43E+05   |
| N/A       | N/A       | 9.25E+03  | 3.58E+07    | 3.93E+06 | 3.47E+07    | N/A    | 3.32E+08    | 7.53E+05   |
| N/A       | N/A       | 1.39E+04  | 1.71E+07    | 5.70E+06 | 4.46E+07    | N/A    | 6.22E+08    | 1.56E+06   |
| N/A       | N/A       | 1.05E+03  | 1.19E+07    | 4.21E+06 | 2.55E+07    | N/A    | 4.36E+08    | 8.74E+05   |
| N/A       | N/A       | 3.04E+04  | 1.01E+07    | 1.02E+06 | 1.39E+07    | N/A    | 1.02E+08    | 1.18E+05   |

CL(18:2/18 CL(18:2/18 CL(18:2/18 CL(18:2/18 CL(18:2/18 CL(18:2/18 CL(18:2/18 CL(18:2/18 Carbamoyl

|          |          |          |          |          |          |          |          |     |
|----------|----------|----------|----------|----------|----------|----------|----------|-----|
| 2.65E+05 | 2.82E+07 | 1.19E+07 | 4.93E+06 | 8.11E+06 | 1.77E+07 | 1.67E+05 | 1.45E+06 | N/A |
| 2.85E+05 | 2.61E+07 | 8.26E+06 | 3.43E+06 | 9.31E+06 | 1.37E+07 | 3.11E+05 | 1.31E+06 | N/A |
| 2.21E+05 | 5.08E+07 | 7.77E+06 | 1.23E+07 | 1.58E+07 | 1.93E+07 | 4.36E+05 | 1.56E+06 | N/A |
| 2.13E+05 | 3.97E+07 | 9.11E+06 | 1.23E+07 | 7.54E+06 | 1.93E+07 | 2.45E+05 | 1.54E+06 | N/A |
| 1.10E+05 | 1.79E+07 | 5.81E+06 | 5.87E+06 | 4.09E+06 | 7.63E+06 | 1.64E+05 | 9.69E+05 | N/A |
| 7.63E+04 | 2.36E+07 | 4.06E+06 | 4.80E+06 | 6.64E+06 | 1.24E+07 | 2.19E+05 | 1.17E+06 | N/A |
| 1.53E+05 | 1.67E+07 | 4.79E+06 | 6.34E+06 | 1.07E+07 | 1.01E+07 | 2.06E+05 | 1.48E+06 | N/A |
| 9.60E+04 | 2.55E+06 | 1.91E+06 | 1.42E+06 | 2.05E+06 | 3.80E+06 | 1.16E+05 | 3.89E+05 | N/A |
| 3.35E+05 | 2.41E+07 | 1.12E+07 | 5.73E+06 | 1.06E+07 | 2.05E+07 | 1.94E+05 | 1.41E+06 | N/A |
| 2.06E+05 | 1.74E+07 | 6.30E+06 | 8.81E+06 | 6.38E+06 | 7.54E+06 | 1.94E+05 | 1.52E+06 | N/A |
| 2.14E+05 | 1.93E+07 | 1.59E+07 | 2.37E+07 | 1.12E+07 | 2.82E+07 | 5.91E+05 | 2.36E+06 | N/A |
| 1.70E+05 | 1.92E+07 | 1.00E+07 | 1.06E+07 | 8.31E+06 | 1.37E+07 | 2.51E+05 | 1.43E+06 | N/A |
| 2.12E+05 | 1.40E+07 | 9.40E+06 | 6.97E+06 | 1.14E+07 | 2.48E+07 | 5.14E+05 | 3.52E+06 | N/A |
| 1.37E+05 | 1.31E+07 | 4.93E+06 | 6.97E+06 | 5.59E+06 | 1.18E+07 | 1.59E+05 | 1.16E+06 | N/A |
| 1.70E+05 | 9.78E+06 | 9.45E+06 | 6.06E+06 | 9.22E+06 | 1.56E+07 | 2.30E+05 | 1.22E+06 | N/A |
| 5.39E+05 | 2.24E+07 | 1.79E+07 | 2.11E+07 | 1.14E+07 | 2.16E+07 | 7.29E+05 | 4.21E+06 | N/A |
| 1.40E+05 | 2.40E+07 | 1.51E+07 | 1.25E+07 | 1.41E+07 | 1.88E+07 | 4.26E+05 | 1.72E+06 | N/A |
| 2.87E+05 | 2.85E+07 | 9.07E+06 | 1.02E+07 | 1.14E+07 | 1.88E+07 | 2.87E+05 | 3.49E+06 | N/A |
| 2.94E+05 | 1.65E+07 | 1.82E+07 | 1.17E+07 | 1.05E+07 | 2.40E+07 | 3.25E+05 | 2.01E+06 | N/A |
| 2.48E+05 | 1.36E+07 | 7.81E+06 | 4.40E+06 | 9.82E+06 | 1.29E+07 | 2.37E+05 | 1.30E+06 | N/A |
| 2.11E+05 | 1.84E+07 | 5.72E+06 | 6.66E+06 | 9.03E+06 | 1.28E+07 | 2.32E+05 | 1.24E+06 | N/A |

| Carnosine | Ceramide(c |
|-----------|------------|------------|------------|------------|------------|------------|------------|
| 9.00E+07  | 2.98E+04   | N/A        | 1.05E+07   | N/A        | N/A        | N/A        | 8.00E+04   |
| 1.36E+08  | 1.50E+04   | N/A        | 2.84E+06   | N/A        | N/A        | N/A        | 3.75E+04   |
| 1.66E+08  | 1.90E+05   | N/A        | 2.36E+07   | N/A        | N/A        | N/A        | 4.91E+05   |
| 1.40E+08  | 1.54E+03   | N/A        | 1.85E+05   | N/A        | N/A        | N/A        | 4.88E+03   |
| 1.48E+08  | 1.96E+04   | N/A        | 5.88E+06   | N/A        | N/A        | N/A        | 4.55E+04   |
| 1.49E+08  | 1.43E+05   | N/A        | 2.35E+07   | N/A        | N/A        | N/A        | 1.58E+06   |
| 1.99E+08  | 1.21E+05   | N/A        | 5.55E+07   | N/A        | N/A        | N/A        | 1.90E+06   |
| 5.17E+06  | 8.16E+04   | N/A        | 7.82E+06   | N/A        | N/A        | N/A        | 9.34E+04   |
| 1.51E+08  | 5.27E+03   | N/A        | 1.04E+06   | N/A        | N/A        | N/A        | 5.41E+03   |
| 5.98E+07  | 2.31E+03   | N/A        | 1.96E+05   | N/A        | N/A        | N/A        | 2.17E+03   |
| 7.92E+07  | 8.65E+04   | N/A        | 1.51E+07   | N/A        | N/A        | N/A        | 4.41E+05   |
| 2.04E+08  | 5.32E+04   | N/A        | 1.68E+07   | N/A        | N/A        | N/A        | 2.40E+05   |
| 1.70E+08  | 2.95E+03   | N/A        | 1.30E+06   | N/A        | N/A        | N/A        | 3.63E+04   |
| 1.90E+08  | 8.54E+03   | N/A        | 2.61E+05   | N/A        | N/A        | N/A        | 9.95E+02   |
| 4.37E+07  | 5.71E+03   | N/A        | 8.41E+05   | N/A        | N/A        | N/A        | 1.85E+04   |
| 1.18E+08  | 2.97E+03   | N/A        | 1.61E+05   | N/A        | N/A        | N/A        | 2.13E+03   |
| 2.34E+07  | 3.51E+04   | N/A        | 1.74E+06   | N/A        | N/A        | N/A        | 7.18E+04   |
| 1.86E+08  | 2.37E+04   | N/A        | 1.79E+06   | N/A        | N/A        | N/A        | 3.97E+03   |
| 1.75E+08  | 1.10E+04   | N/A        | 1.09E+06   | N/A        | N/A        | N/A        | 1.14E+04   |
| 1.91E+08  | 8.05E+03   | N/A        | 8.80E+05   | N/A        | N/A        | N/A        | 9.10E+03   |
| 7.03E+07  | 4.08E+03   | N/A        | 3.88E+04   | N/A        | N/A        | N/A        | 1.58E+03   |



Ceramide(c Ceramide(c Ceramide(c Ceramide(c Ceramide(c Ceramide(c Ceramide(c Ceramide(c Ceramide(c

|              |              |     |     |     |     |     |
|--------------|--------------|-----|-----|-----|-----|-----|
| 6.90E+06 N/A | 1.38E+05 N/A | N/A | N/A | N/A | N/A | N/A |
| 1.26E+06 N/A | 1.33E+05 N/A | N/A | N/A | N/A | N/A | N/A |
| 2.91E+07 N/A | 1.10E+06 N/A | N/A | N/A | N/A | N/A | N/A |
| 3.45E+05 N/A | 4.95E+03 N/A | N/A | N/A | N/A | N/A | N/A |
| 1.18E+07 N/A | 6.49E+04 N/A | N/A | N/A | N/A | N/A | N/A |
| 6.93E+07 N/A | 2.19E+06 N/A | N/A | N/A | N/A | N/A | N/A |
| 1.37E+08 N/A | 3.21E+06 N/A | N/A | N/A | N/A | N/A | N/A |
| 1.06E+06 N/A | 1.92E+05 N/A | N/A | N/A | N/A | N/A | N/A |
| 1.09E+06 N/A | 2.50E+04 N/A | N/A | N/A | N/A | N/A | N/A |
| 2.39E+05 N/A | 1.63E+03 N/A | N/A | N/A | N/A | N/A | N/A |
| 3.17E+07 N/A | 5.99E+05 N/A | N/A | N/A | N/A | N/A | N/A |
| 2.45E+07 N/A | 2.46E+05 N/A | N/A | N/A | N/A | N/A | N/A |
| 1.25E+06 N/A | 9.08E+03 N/A | N/A | N/A | N/A | N/A | N/A |
| 6.99E+05 N/A | 5.07E+03 N/A | N/A | N/A | N/A | N/A | N/A |
| 7.23E+05 N/A | 1.60E+04 N/A | N/A | N/A | N/A | N/A | N/A |
| 7.39E+05 N/A | 2.89E+03 N/A | N/A | N/A | N/A | N/A | N/A |
| 2.14E+06 N/A | 1.63E+05 N/A | N/A | N/A | N/A | N/A | N/A |
| 1.36E+06 N/A | 2.75E+04 N/A | N/A | N/A | N/A | N/A | N/A |
| 1.64E+06 N/A | 4.55E+04 N/A | N/A | N/A | N/A | N/A | N/A |
| 9.32E+05 N/A | 2.55E+04 N/A | N/A | N/A | N/A | N/A | N/A |
| 3.22E+05 N/A | 5.91E+04 N/A | N/A | N/A | N/A | N/A | N/A |



Ceramide(c Ceramide(c Ceramide(c Ceramide(c Ceramide(c Ceramide(c Ceramide(c Ceramide(c Ceramide(c

|     |          |     |     |     |     |     |     |     |
|-----|----------|-----|-----|-----|-----|-----|-----|-----|
| N/A | 4.65E+05 | N/A |
| N/A | 3.09E+05 | N/A |
| N/A | 1.15E+06 | N/A |
| N/A | 4.18E+03 | N/A |
| N/A | 8.88E+05 | N/A |
| N/A | 9.12E+06 | N/A |
| N/A | 2.14E+07 | N/A |
| N/A | 4.31E+05 | N/A |
| N/A | 6.31E+04 | N/A |
| N/A | 1.73E+03 | N/A |
| N/A | 1.65E+06 | N/A |
| N/A | 2.46E+06 | N/A |
| N/A | 1.15E+05 | N/A |
| N/A | 1.98E+04 | N/A |
| N/A | 2.22E+05 | N/A |
| N/A | 2.29E+05 | N/A |
| N/A | 5.05E+04 | N/A |
| N/A | 2.15E+04 | N/A |
| N/A | 2.31E+05 | N/A |
| N/A | 7.33E+04 | N/A |
| N/A | 4.89E+03 | N/A |

Ceramide(c Ceramide(c Chenodeox Chenodeox Cholestenc Cholestero Cholestery Cholic acid Choline

|     |     |     |     |     |          |          |     |     |
|-----|-----|-----|-----|-----|----------|----------|-----|-----|
| N/A | N/A | N/A | N/A | N/A | 2.52E+05 | 5.19E+06 | N/A | N/A |
| N/A | N/A | N/A | N/A | N/A | 1.26E+05 | 5.12E+06 | N/A | N/A |
| N/A | N/A | N/A | N/A | N/A | 1.45E+06 | 5.31E+06 | N/A | N/A |
| N/A | N/A | N/A | N/A | N/A | 1.54E+04 | 7.99E+06 | N/A | N/A |
| N/A | N/A | N/A | N/A | N/A | 1.81E+05 | 5.93E+06 | N/A | N/A |
| N/A | N/A | N/A | N/A | N/A | 1.83E+06 | 5.53E+06 | N/A | N/A |
| N/A | N/A | N/A | N/A | N/A | 6.96E+06 | 1.12E+07 | N/A | N/A |
| N/A | N/A | N/A | N/A | N/A | 1.97E+04 | 2.37E+07 | N/A | N/A |
| N/A | N/A | N/A | N/A | N/A | 2.47E+04 | 6.10E+06 | N/A | N/A |
| N/A | N/A | N/A | N/A | N/A | 4.68E+03 | 7.45E+06 | N/A | N/A |
| N/A | N/A | N/A | N/A | N/A | 7.09E+05 | 8.23E+06 | N/A | N/A |
| N/A | N/A | N/A | N/A | N/A | 6.55E+05 | 9.11E+06 | N/A | N/A |
| N/A | N/A | N/A | N/A | N/A | 1.99E+04 | 5.45E+06 | N/A | N/A |
| N/A | N/A | N/A | N/A | N/A | 1.48E+04 | 7.17E+06 | N/A | N/A |
| N/A | N/A | N/A | N/A | N/A | 4.77E+04 | 6.83E+06 | N/A | N/A |
| N/A | N/A | N/A | N/A | N/A | 3.73E+04 | 3.24E+07 | N/A | N/A |
| N/A | N/A | N/A | N/A | N/A | 1.01E+04 | 7.90E+06 | N/A | N/A |
| N/A | N/A | N/A | N/A | N/A | 6.82E+03 | 5.59E+06 | N/A | N/A |
| N/A | N/A | N/A | N/A | N/A | 9.24E+04 | 6.11E+06 | N/A | N/A |
| N/A | N/A | N/A | N/A | N/A | 2.49E+04 | 5.67E+06 | N/A | N/A |
| N/A | N/A | N/A | N/A | N/A | 7.38E+04 | 1.20E+07 | N/A | N/A |

| Cinnamoyl | Citramalic | Citric acid | Citrulline | CoA      | CoQ10    | CoQ10H2 | CoQ9 | CoQ9H2 |
|-----------|------------|-------------|------------|----------|----------|---------|------|--------|
| N/A       | 2.10E+06   | 1.11E+06    | 9.52E+06   | 3.15E+05 | 9.04E+04 | N/A     | N/A  | N/A    |
| N/A       | 1.51E+06   | 3.20E+06    | 1.73E+07   | 1.15E+05 | 2.58E+04 | N/A     | N/A  | N/A    |
| N/A       | 2.52E+06   | 2.46E+06    | 1.43E+07   | 1.27E+06 | 3.47E+04 | N/A     | N/A  | N/A    |
| N/A       | 3.18E+06   | 2.00E+06    | 1.25E+07   | 2.86E+05 | 6.43E+04 | N/A     | N/A  | N/A    |
| N/A       | 2.52E+06   | 3.18E+06    | 1.86E+07   | 5.93E+05 | 2.42E+04 | N/A     | N/A  | N/A    |
| N/A       | 9.06E+06   | 6.00E+06    | 2.03E+07   | 7.79E+05 | 1.21E+05 | N/A     | N/A  | N/A    |
| N/A       | 3.66E+06   | 5.09E+06    | 2.30E+06   | 2.34E+06 | 2.32E+05 | N/A     | N/A  | N/A    |
| N/A       | 1.94E+06   | 1.40E+05    | 2.13E+06   | 1.31E+05 | 3.54E+04 | N/A     | N/A  | N/A    |
| N/A       | 2.72E+06   | 3.98E+06    | 1.25E+07   | 4.55E+05 | 3.53E+04 | N/A     | N/A  | N/A    |
| N/A       | 1.63E+06   | 2.19E+05    | 2.60E+06   | 1.23E+05 | 1.92E+04 | N/A     | N/A  | N/A    |
| N/A       | 2.67E+06   | 1.75E+06    | 4.34E+06   | 6.44E+05 | 5.99E+04 | N/A     | N/A  | N/A    |
| N/A       | 1.82E+06   | 4.16E+06    | 1.60E+07   | 3.72E+05 | 6.70E+04 | N/A     | N/A  | N/A    |
| N/A       | 2.56E+06   | 3.10E+06    | 1.02E+07   | 8.42E+05 | 7.40E+04 | N/A     | N/A  | N/A    |
| N/A       | 2.93E+06   | 1.05E+07    | 1.96E+07   | 5.95E+05 | 1.82E+05 | N/A     | N/A  | N/A    |
| N/A       | 2.17E+06   | 9.77E+04    | 1.77E+06   | 1.30E+05 | 1.73E+04 | N/A     | N/A  | N/A    |
| N/A       | 2.26E+06   | 1.94E+06    | 3.10E+06   | 1.82E+05 | 5.97E+03 | N/A     | N/A  | N/A    |
| N/A       | 1.85E+06   | 1.77E+06    | 3.98E+06   | 4.94E+05 | 3.68E+04 | N/A     | N/A  | N/A    |
| N/A       | 1.69E+06   | 5.04E+06    | 4.62E+06   | 4.77E+05 | 6.11E+03 | N/A     | N/A  | N/A    |
| N/A       | 2.02E+06   | 3.30E+06    | 1.48E+07   | 1.49E+05 | 8.58E+04 | N/A     | N/A  | N/A    |
| N/A       | 2.54E+06   | 2.35E+06    | 6.98E+06   | 1.56E+05 | 1.15E+05 | N/A     | N/A  | N/A    |
| N/A       | 2.10E+06   | 2.43E+05    | 8.59E+06   | 3.52E+04 | 9.07E+04 | N/A     | N/A  | N/A    |

| Corticoster | Cortisol | Cortisone | Creatine | Creatinine | Cyanocoba | Cyclic aden | Cysteamine | Cysteine |
|-------------|----------|-----------|----------|------------|-----------|-------------|------------|----------|
| N/A         | N/A      | N/A       | 8.08E+08 | 1.68E+07   | N/A       | 6.03E+05    | N/A        | 1.19E+06 |
| N/A         | N/A      | N/A       | 9.45E+08 | 6.71E+07   | N/A       | 1.26E+05    | N/A        | 1.27E+06 |
| N/A         | N/A      | N/A       | 9.78E+08 | 7.45E+07   | N/A       | 2.52E+05    | N/A        | 1.06E+06 |
| N/A         | N/A      | N/A       | 7.88E+08 | 1.97E+07   | N/A       | 4.23E+05    | N/A        | 3.29E+05 |
| N/A         | N/A      | N/A       | 1.10E+09 | 1.05E+08   | N/A       | 8.45E+04    | N/A        | 1.05E+06 |
| N/A         | N/A      | N/A       | 1.12E+09 | 1.14E+08   | N/A       | 2.11E+05    | N/A        | 4.18E+05 |
| N/A         | N/A      | N/A       | 1.18E+09 | 8.69E+07   | N/A       | 5.38E+05    | N/A        | 2.69E+05 |
| N/A         | N/A      | N/A       | 2.29E+08 | 5.29E+05   | N/A       | 3.16E+04    | N/A        | 1.26E+05 |
| N/A         | N/A      | N/A       | 9.40E+08 | 8.83E+07   | N/A       | 9.46E+04    | N/A        | 3.26E+05 |
| N/A         | N/A      | N/A       | 5.37E+08 | 2.01E+07   | N/A       | 9.42E+03    | N/A        | 1.28E+05 |
| N/A         | N/A      | N/A       | 9.27E+08 | 5.83E+07   | N/A       | 1.75E+05    | N/A        | 2.45E+05 |
| N/A         | N/A      | N/A       | 9.57E+08 | 1.05E+08   | N/A       | 4.36E+04    | N/A        | 5.75E+05 |
| N/A         | N/A      | N/A       | 9.67E+08 | 9.28E+07   | N/A       | 2.09E+05    | N/A        | 2.39E+05 |
| N/A         | N/A      | N/A       | 9.33E+08 | 1.30E+08   | N/A       | 1.08E+05    | N/A        | 5.19E+05 |
| N/A         | N/A      | N/A       | 4.21E+08 | 1.73E+06   | N/A       | 3.40E+04    | N/A        | 3.29E+05 |
| N/A         | N/A      | N/A       | 6.97E+08 | 1.26E+07   | N/A       | 1.41E+05    | N/A        | 1.32E+05 |
| N/A         | N/A      | N/A       | 7.62E+08 | 7.19E+06   | N/A       | 7.49E+04    | N/A        | 5.99E+04 |
| N/A         | N/A      | N/A       | 8.20E+08 | 3.29E+07   | N/A       | 2.49E+05    | N/A        | 2.72E+05 |
| N/A         | N/A      | N/A       | 9.67E+08 | 1.16E+08   | N/A       | 4.41E+04    | N/A        | 5.75E+05 |
| N/A         | N/A      | N/A       | 8.67E+08 | 9.06E+07   | N/A       | 2.68E+04    | N/A        | 8.64E+05 |
| N/A         | N/A      | N/A       | 6.07E+08 | 9.16E+06   | N/A       | 3.64E+04    | N/A        | 2.89E+05 |

| Cysteine-S- | Cytidine | Cytidine dij | Cytidine dij | Cytidine m | Cytidine tri | Cytosine | D-Glyceralk | DHC(18:1/: |
|-------------|----------|--------------|--------------|------------|--------------|----------|-------------|------------|
| N/A         | 9.70E+07 | N/A          | 9.29E+05     | 2.10E+06   | N/A          | 9.53E+07 | 4.70E+05    | 3.93E+06   |
| N/A         | 1.85E+08 | N/A          | 2.67E+05     | 1.22E+06   | N/A          | 2.03E+08 | 1.35E+06    | 2.98E+06   |
| N/A         | 7.01E+07 | N/A          | 8.66E+05     | 1.97E+06   | N/A          | 1.35E+08 | 4.33E+05    | 2.30E+06   |
| N/A         | 6.90E+07 | N/A          | 2.34E+05     | 7.50E+05   | N/A          | 1.00E+08 | 5.68E+05    | 3.68E+06   |
| N/A         | 1.08E+08 | N/A          | 1.11E+06     | 2.38E+06   | N/A          | 7.48E+07 | 1.88E+06    | 8.71E+05   |
| N/A         | 9.22E+07 | N/A          | 4.12E+05     | 1.86E+06   | N/A          | 6.05E+07 | 6.83E+05    | 4.81E+05   |
| N/A         | 5.07E+07 | N/A          | 4.49E+05     | 3.56E+06   | N/A          | 4.75E+07 | 1.50E+06    | 3.83E+06   |
| N/A         | 3.00E+06 | N/A          | 6.44E+03     | 2.33E+04   | N/A          | 2.71E+06 | 2.13E+05    | 4.33E+06   |
| N/A         | 6.73E+07 | N/A          | 2.60E+05     | 1.02E+06   | N/A          | 4.79E+07 | 6.77E+05    | 2.66E+06   |
| N/A         | 5.86E+07 | N/A          | 8.61E+03     | 3.02E+04   | N/A          | 1.95E+07 | 5.61E+05    | 1.35E+07   |
| N/A         | 7.51E+07 | N/A          | 1.74E+05     | 1.03E+06   | N/A          | 7.79E+07 | 7.05E+05    | 2.74E+06   |
| N/A         | 1.08E+08 | N/A          | 3.28E+05     | 1.22E+06   | N/A          | 7.84E+07 | 1.61E+06    | 1.19E+06   |
| N/A         | 6.86E+07 | N/A          | 1.89E+05     | 8.70E+05   | N/A          | 3.09E+07 | 4.47E+05    | 2.53E+06   |
| N/A         | 1.47E+08 | N/A          | 2.16E+05     | 1.01E+06   | N/A          | 4.26E+07 | 3.86E+05    | 3.69E+06   |
| N/A         | 1.42E+07 | N/A          | 1.08E+05     | 2.36E+05   | N/A          | 1.10E+08 | 2.37E+05    | 1.09E+06   |
| N/A         | 1.40E+07 | N/A          | 9.36E+04     | 2.42E+05   | N/A          | 1.40E+07 | 3.25E+06    | 9.31E+06   |
| N/A         | 2.90E+07 | N/A          | 9.67E+04     | 3.94E+05   | N/A          | 2.78E+07 | 1.02E+06    | 3.04E+06   |
| N/A         | 6.15E+07 | N/A          | 2.66E+05     | 7.53E+05   | N/A          | 6.30E+07 | 1.56E+06    | 4.53E+06   |
| N/A         | 9.92E+07 | N/A          | 3.32E+05     | 1.40E+06   | N/A          | 3.59E+07 | 5.61E+05    | 1.22E+06   |
| N/A         | 1.67E+08 | N/A          | 1.89E+05     | 5.46E+05   | N/A          | 6.28E+07 | 2.68E+05    | 1.76E+06   |
| N/A         | 2.51E+07 | N/A          | 7.44E+04     | 1.75E+05   | N/A          | 5.76E+07 | 2.19E+05    | 1.77E+06   |

DHC(18:1/; DHC(18:1/; DHC(18:1/; DHC(18:1/; DL-2-Amino DL-O-Phos| Decanoylc; Dehydroas; Dehydroep

|          |          |          |          |     |     |          |          |     |
|----------|----------|----------|----------|-----|-----|----------|----------|-----|
| 4.48E+04 | 3.49E+04 | 1.67E+04 | 8.44E+04 | N/A | N/A | 2.33E+05 | 4.00E+06 | N/A |
| 8.12E+04 | 3.02E+04 | 3.41E+04 | 1.88E+05 | N/A | N/A | 2.90E+05 | 1.23E+07 | N/A |
| 2.31E+04 | 9.53E+03 | 9.83E+03 | 3.12E+04 | N/A | N/A | 2.49E+05 | 8.62E+06 | N/A |
| 2.02E+04 | 4.73E+03 | 1.33E+04 | 7.14E+04 | N/A | N/A | 2.22E+05 | 7.44E+06 | N/A |
| 2.98E+04 | 1.04E+04 | 1.75E+04 | 6.81E+04 | N/A | N/A | 4.54E+05 | 1.09E+07 | N/A |
| 8.02E+03 | 7.09E+03 | 1.34E+04 | 6.35E+04 | N/A | N/A | 4.01E+06 | 2.06E+07 | N/A |
| 3.00E+04 | 8.67E+03 | 3.70E+04 | 1.80E+05 | N/A | N/A | 2.97E+06 | 2.14E+07 | N/A |
| 5.20E+04 | 3.43E+04 | 1.60E+05 | 1.29E+06 | N/A | N/A | 2.18E+05 | 4.37E+05 | N/A |
| 2.27E+04 | 7.09E+03 | 1.43E+04 | 1.88E+05 | N/A | N/A | 7.18E+05 | 1.61E+07 | N/A |
| 1.95E+05 | 8.55E+04 | 2.31E+05 | 1.72E+06 | N/A | N/A | 4.19E+05 | 6.99E+05 | N/A |
| 2.55E+04 | 1.25E+04 | 1.84E+04 | 1.27E+05 | N/A | N/A | 1.21E+06 | 5.36E+06 | N/A |
| 2.63E+04 | 1.90E+04 | 2.35E+04 | 1.62E+05 | N/A | N/A | 2.31E+05 | 1.64E+07 | N/A |
| 2.01E+04 | 1.67E+04 | 2.44E+04 | 2.00E+05 | N/A | N/A | 1.16E+06 | 1.07E+07 | N/A |
| 3.14E+04 | 2.82E+04 | 4.60E+04 | 2.76E+05 | N/A | N/A | 3.75E+05 | 3.91E+07 | N/A |
| 1.97E+04 | 1.85E+04 | 3.93E+04 | 2.20E+05 | N/A | N/A | 2.51E+05 | 2.86E+05 | N/A |
| 1.22E+05 | 6.09E+04 | 1.18E+05 | 6.69E+05 | N/A | N/A | 2.28E+05 | 6.78E+06 | N/A |
| 3.10E+04 | 1.76E+04 | 3.00E+04 | 1.27E+05 | N/A | N/A | 2.91E+05 | 5.50E+06 | N/A |
| 4.32E+04 | 3.78E+04 | 4.74E+04 | 3.70E+05 | N/A | N/A | 3.41E+05 | 1.62E+07 | N/A |
| 2.78E+04 | 1.28E+04 | 2.56E+04 | 2.03E+05 | N/A | N/A | 7.72E+05 | 1.25E+07 | N/A |
| 7.07E+04 | 8.67E+04 | 7.48E+04 | 5.19E+05 | N/A | N/A | 5.01E+05 | 8.09E+06 | N/A |
| 5.38E+04 | 2.90E+04 | 6.75E+04 | 4.17E+05 | N/A | N/A | 9.29E+05 | 5.83E+05 | N/A |



Dehydroep Deoxyaden Deoxyaden Deoxyaden Deoxyaden Deoxycholi Deoxycytid Deoxycytid Deoxycytid

|     |     |     |          |     |     |          |     |     |
|-----|-----|-----|----------|-----|-----|----------|-----|-----|
| N/A | N/A | N/A | 1.98E+05 | N/A | N/A | 1.20E+05 | N/A | N/A |
| N/A | N/A | N/A | 9.67E+04 | N/A | N/A | 1.69E+05 | N/A | N/A |
| N/A | N/A | N/A | 2.87E+05 | N/A | N/A | 1.70E+05 | N/A | N/A |
| N/A | N/A | N/A | 9.01E+04 | N/A | N/A | 1.74E+05 | N/A | N/A |
| N/A | N/A | N/A | 2.39E+05 | N/A | N/A | 3.71E+05 | N/A | N/A |
| N/A | N/A | N/A | 3.09E+05 | N/A | N/A | 2.84E+05 | N/A | N/A |
| N/A | N/A | N/A | 5.00E+05 | N/A | N/A | 5.48E+05 | N/A | N/A |
| N/A | N/A | N/A | 1.23E+04 | N/A | N/A | 1.09E+05 | N/A | N/A |
| N/A | N/A | N/A | 1.77E+05 | N/A | N/A | 2.56E+05 | N/A | N/A |
| N/A | N/A | N/A | 1.09E+05 | N/A | N/A | 1.07E+05 | N/A | N/A |
| N/A | N/A | N/A | 1.45E+05 | N/A | N/A | 2.28E+05 | N/A | N/A |
| N/A | N/A | N/A | 1.83E+05 | N/A | N/A | 1.87E+05 | N/A | N/A |
| N/A | N/A | N/A | 8.43E+04 | N/A | N/A | 1.84E+05 | N/A | N/A |
| N/A | N/A | N/A | 6.61E+04 | N/A | N/A | 3.31E+05 | N/A | N/A |
| N/A | N/A | N/A | 7.99E+03 | N/A | N/A | 9.10E+04 | N/A | N/A |
| N/A | N/A | N/A | 4.48E+04 | N/A | N/A | 1.78E+05 | N/A | N/A |
| N/A | N/A | N/A | 8.15E+04 | N/A | N/A | 9.79E+04 | N/A | N/A |
| N/A | N/A | N/A | 3.24E+05 | N/A | N/A | 1.65E+05 | N/A | N/A |
| N/A | N/A | N/A | 1.38E+05 | N/A | N/A | 2.39E+05 | N/A | N/A |
| N/A | N/A | N/A | 9.66E+04 | N/A | N/A | 8.53E+04 | N/A | N/A |
| N/A | N/A | N/A | 1.31E+04 | N/A | N/A | 1.05E+05 | N/A | N/A |

Deoxyguan Deoxyguan Deoxyguan Deoxyinosi Deoxyribos Deoxythyr Deoxyuridi Deoxyuridi Deoxyuridi

|     |          |     |     |     |          |          |     |     |
|-----|----------|-----|-----|-----|----------|----------|-----|-----|
| N/A | 2.03E+07 | N/A | N/A | N/A | 4.48E+04 | 8.88E+04 | N/A | N/A |
| N/A | 7.60E+05 | N/A | N/A | N/A | 5.21E+04 | 3.53E+05 | N/A | N/A |
| N/A | 3.29E+07 | N/A | N/A | N/A | 1.49E+05 | 2.06E+05 | N/A | N/A |
| N/A | 1.96E+07 | N/A | N/A | N/A | 5.67E+04 | 1.16E+05 | N/A | N/A |
| N/A | 3.41E+06 | N/A | N/A | N/A | 8.05E+04 | 2.86E+05 | N/A | N/A |
| N/A | 5.02E+06 | N/A | N/A | N/A | 4.90E+04 | 3.72E+05 | N/A | N/A |
| N/A | 3.20E+07 | N/A | N/A | N/A | 2.94E+04 | 1.77E+05 | N/A | N/A |
| N/A | 6.81E+06 | N/A | N/A | N/A | 1.11E+04 | 9.32E+03 | N/A | N/A |
| N/A | 2.37E+07 | N/A | N/A | N/A | 5.72E+04 | 1.34E+05 | N/A | N/A |
| N/A | 8.82E+06 | N/A | N/A | N/A | 4.59E+04 | 1.55E+05 | N/A | N/A |
| N/A | 3.48E+07 | N/A | N/A | N/A | 1.25E+05 | 1.28E+05 | N/A | N/A |
| N/A | 1.33E+06 | N/A | N/A | N/A | 4.94E+04 | 4.48E+05 | N/A | N/A |
| N/A | 1.91E+07 | N/A | N/A | N/A | 1.11E+05 | 1.77E+05 | N/A | N/A |
| N/A | 1.91E+07 | N/A | N/A | N/A | 7.82E+04 | 1.60E+05 | N/A | N/A |
| N/A | 5.98E+05 | N/A | N/A | N/A | 1.83E+04 | 8.88E+03 | N/A | N/A |
| N/A | 3.75E+07 | N/A | N/A | N/A | 2.81E+04 | 2.98E+04 | N/A | N/A |
| N/A | 2.71E+07 | N/A | N/A | N/A | 3.29E+04 | 5.11E+04 | N/A | N/A |
| N/A | 5.67E+06 | N/A | N/A | N/A | 3.96E+04 | 1.03E+05 | N/A | N/A |
| N/A | 1.17E+06 | N/A | N/A | N/A | 1.50E+05 | 2.03E+05 | N/A | N/A |
| N/A | 7.01E+05 | N/A | N/A | N/A | 7.77E+04 | 2.38E+05 | N/A | N/A |
| N/A | 1.01E+06 | N/A | N/A | N/A | 2.94E+04 | 6.90E+03 | N/A | N/A |

| Desmoster | Dihydroxy | Dimethyl-L | Dimethylgl | Docosahex | Dodecanoy | Dodecenoy | Dopamine | Eicosapent |
|-----------|-----------|------------|------------|-----------|-----------|-----------|----------|------------|
| N/A       | N/A       | 2.03E+07   | 3.75E+07   | 1.78E+06  | 8.83E+06  | 1.91E+06  | 4.21E+07 | 2.37E+05   |
| N/A       | N/A       | 6.68E+07   | 2.17E+07   | 1.88E+06  | 6.67E+06  | 3.69E+06  | 8.28E+07 | 4.22E+05   |
| N/A       | N/A       | 5.75E+07   | 5.45E+07   | 5.90E+06  | 1.22E+07  | 1.21E+06  | 5.57E+07 | 1.01E+06   |
| N/A       | N/A       | 9.04E+06   | 7.31E+06   | 6.77E+05  | 2.65E+06  | 7.35E+05  | 3.01E+07 | 2.55E+05   |
| N/A       | N/A       | 3.67E+07   | 1.52E+08   | 3.37E+06  | 6.72E+07  | 9.40E+06  | 8.63E+07 | 1.13E+06   |
| N/A       | N/A       | 3.76E+07   | 3.09E+07   | 5.47E+06  | 4.88E+08  | 4.97E+07  | 5.12E+07 | 4.87E+05   |
| N/A       | N/A       | 1.06E+07   | 4.01E+07   | 2.29E+06  | 3.29E+08  | 3.18E+07  | 1.10E+07 | 4.18E+05   |
| N/A       | N/A       | 1.61E+06   | 3.83E+06   | 1.81E+07  | 3.38E+06  | 3.56E+05  | 7.49E+05 | 5.63E+06   |
| N/A       | N/A       | 1.09E+07   | 2.72E+07   | 3.50E+06  | 5.31E+07  | 5.92E+06  | 5.44E+07 | 1.02E+06   |
| N/A       | N/A       | 3.81E+06   | 3.99E+06   | 9.06E+06  | 6.01E+06  | 2.03E+06  | 3.86E+07 | 3.31E+06   |
| N/A       | N/A       | 1.24E+07   | 1.45E+07   | 1.34E+06  | 1.41E+08  | 1.18E+07  | 4.19E+07 | 3.98E+05   |
| N/A       | N/A       | 2.65E+07   | 3.60E+07   | 2.93E+07  | 1.09E+07  | 4.73E+06  | 9.36E+07 | 2.90E+06   |
| N/A       | N/A       | 1.45E+07   | 1.82E+07   | 1.03E+06  | 8.30E+07  | 2.40E+07  | 7.73E+07 | 7.78E+05   |
| N/A       | N/A       | 1.53E+07   | 3.74E+07   | 2.86E+06  | 3.29E+07  | 3.93E+06  | 9.11E+07 | 3.22E+06   |
| N/A       | N/A       | 3.14E+06   | 2.87E+06   | 5.24E+06  | 1.90E+06  | 6.91E+05  | 1.29E+07 | 1.17E+06   |
| N/A       | N/A       | 2.73E+06   | 5.66E+06   | 1.59E+07  | 1.10E+07  | 6.50E+06  | 1.71E+07 | 2.00E+06   |
| N/A       | N/A       | 3.33E+06   | 5.23E+06   | 2.93E+05  | 2.84E+07  | 5.72E+06  | 2.12E+07 | 1.29E+05   |
| N/A       | N/A       | 8.58E+06   | 1.35E+07   | 2.73E+06  | 3.08E+07  | 9.40E+06  | 5.50E+07 | 5.02E+05   |
| N/A       | N/A       | 1.79E+07   | 3.20E+07   | 3.68E+06  | 8.10E+07  | 1.19E+07  | 7.80E+07 | 1.58E+06   |
| N/A       | N/A       | 3.40E+07   | 4.82E+06   | 5.15E+06  | 3.98E+07  | 9.83E+06  | 7.46E+07 | 9.02E+05   |
| N/A       | N/A       | 4.54E+06   | 6.35E+06   | 4.89E+06  | 5.31E+06  | 9.90E+05  | 2.67E+07 | 1.38E+06   |

| Epinephrin | Erythrose 4 | Estradiol | Estriol | Estrone | Ethanolam | FAD      | FMN | Farnesyl di |
|------------|-------------|-----------|---------|---------|-----------|----------|-----|-------------|
| N/A        | 2.96E+06    | N/A       | N/A     | N/A     | 1.55E+07  | 1.53E+06 | N/A | 1.84E+05    |
| N/A        | 7.18E+06    | N/A       | N/A     | N/A     | 2.50E+07  | 4.82E+05 | N/A | 1.55E+05    |
| N/A        | 2.58E+06    | N/A       | N/A     | N/A     | 1.21E+07  | 2.93E+06 | N/A | 2.70E+05    |
| N/A        | 3.16E+06    | N/A       | N/A     | N/A     | 9.69E+06  | 2.06E+06 | N/A | 1.54E+05    |
| N/A        | 1.21E+06    | N/A       | N/A     | N/A     | 1.59E+07  | 5.25E+05 | N/A | 1.05E+06    |
| N/A        | 1.33E+07    | N/A       | N/A     | N/A     | 1.13E+07  | 1.39E+06 | N/A | 6.03E+05    |
| N/A        | 1.07E+07    | N/A       | N/A     | N/A     | 1.64E+07  | 1.83E+06 | N/A | 1.26E+06    |
| N/A        | 1.69E+05    | N/A       | N/A     | N/A     | 8.33E+05  | 4.05E+05 | N/A | 2.25E+04    |
| N/A        | 2.11E+06    | N/A       | N/A     | N/A     | 8.52E+06  | 1.56E+06 | N/A | 3.75E+05    |
| N/A        | 4.22E+05    | N/A       | N/A     | N/A     | 3.50E+06  | 4.43E+05 | N/A | 8.11E+04    |
| N/A        | 2.28E+06    | N/A       | N/A     | N/A     | 5.31E+06  | 2.89E+06 | N/A | 5.94E+05    |
| N/A        | 7.43E+05    | N/A       | N/A     | N/A     | 1.03E+07  | 8.74E+05 | N/A | 1.91E+05    |
| N/A        | 2.91E+06    | N/A       | N/A     | N/A     | 6.42E+06  | 2.65E+06 | N/A | 1.19E+05    |
| N/A        | 2.04E+06    | N/A       | N/A     | N/A     | 2.34E+07  | 2.25E+06 | N/A | 3.30E+05    |
| N/A        | 2.08E+05    | N/A       | N/A     | N/A     | 3.05E+06  | 2.15E+05 | N/A | 2.00E+04    |
| N/A        | 3.11E+06    | N/A       | N/A     | N/A     | 1.52E+06  | 1.81E+06 | N/A | 3.40E+05    |
| N/A        | 2.35E+06    | N/A       | N/A     | N/A     | 2.70E+06  | 2.36E+06 | N/A | 6.30E+04    |
| N/A        | 4.54E+06    | N/A       | N/A     | N/A     | 4.55E+06  | 2.15E+06 | N/A | 3.75E+05    |
| N/A        | 1.02E+06    | N/A       | N/A     | N/A     | 1.02E+07  | 5.50E+05 | N/A | 4.90E+05    |
| N/A        | 6.75E+05    | N/A       | N/A     | N/A     | 3.11E+07  | 9.82E+05 | N/A | 4.82E+04    |
| N/A        | 4.20E+05    | N/A       | N/A     | N/A     | 2.83E+06  | 3.90E+05 | N/A | 6.69E+04    |

| Folic acid | Fumaric ac | GC(18:1/16 | GC(18:1/20 | GC(18:1/22 | GC(18:1/24 | GC(18:1/26 | GC(18:2/16 | Gamma-Ar |
|------------|------------|------------|------------|------------|------------|------------|------------|----------|
| N/A        | 1.86E+07   | 1.82E+05   | N/A        | N/A        | N/A        | 1.09E+04   | N/A        | 6.24E+05 |
| N/A        | 2.53E+07   | 7.72E+04   | N/A        | N/A        | N/A        | 8.14E+03   | N/A        | 5.97E+05 |
| N/A        | 2.51E+07   | 7.19E+04   | N/A        | N/A        | N/A        | 6.06E+03   | N/A        | 1.08E+06 |
| N/A        | 2.13E+07   | 1.50E+05   | N/A        | N/A        | N/A        | 6.10E+03   | N/A        | 4.20E+05 |
| N/A        | 3.20E+07   | 3.32E+04   | N/A        | N/A        | N/A        | 4.77E+03   | N/A        | 7.63E+05 |
| N/A        | 6.01E+07   | 9.53E+03   | N/A        | N/A        | N/A        | 1.00E+04   | N/A        | 9.91E+05 |
| N/A        | 3.84E+07   | 8.72E+04   | N/A        | N/A        | N/A        | 1.48E+04   | N/A        | 5.32E+05 |
| N/A        | 1.29E+07   | 1.02E+05   | N/A        | N/A        | N/A        | 7.22E+04   | N/A        | 9.68E+04 |
| N/A        | 2.77E+07   | 9.28E+04   | N/A        | N/A        | N/A        | 1.14E+04   | N/A        | 2.65E+05 |
| N/A        | 1.76E+07   | 2.43E+05   | N/A        | N/A        | N/A        | 5.14E+04   | N/A        | 3.94E+05 |
| N/A        | 3.05E+07   | 9.08E+04   | N/A        | N/A        | N/A        | 7.95E+03   | N/A        | 5.69E+05 |
| N/A        | 3.55E+07   | 2.75E+04   | N/A        | N/A        | N/A        | 8.89E+03   | N/A        | 3.68E+05 |
| N/A        | 1.43E+07   | 5.78E+04   | N/A        | N/A        | N/A        | 5.81E+03   | N/A        | 2.60E+05 |
| N/A        | 1.40E+07   | 1.22E+05   | N/A        | N/A        | N/A        | 7.07E+03   | N/A        | 4.31E+05 |
| N/A        | 2.08E+07   | 2.74E+04   | N/A        | N/A        | N/A        | 9.29E+03   | N/A        | 1.38E+05 |
| N/A        | 2.72E+07   | 2.35E+05   | N/A        | N/A        | N/A        | 7.44E+04   | N/A        | 6.74E+04 |
| N/A        | 2.51E+07   | 1.12E+05   | N/A        | N/A        | N/A        | 1.28E+04   | N/A        | 7.64E+04 |
| N/A        | 1.75E+07   | 1.70E+05   | N/A        | N/A        | N/A        | 6.87E+04   | N/A        | 6.41E+04 |
| N/A        | 3.42E+07   | 3.26E+04   | N/A        | N/A        | N/A        | 9.79E+03   | N/A        | 5.32E+05 |
| N/A        | 2.23E+07   | 3.91E+04   | N/A        | N/A        | N/A        | 8.04E+03   | N/A        | 3.20E+05 |
| N/A        | 2.83E+07   | 6.09E+04   | N/A        | N/A        | N/A        | 5.70E+03   | N/A        | 7.03E+05 |

Gamma-gl $\gamma$  Gamma-gl $\gamma$  Gamma-gl $\gamma$  Gamma-gl $\gamma$  Geranyl-PP Glucaric ac Gluconic ac Gluconolac Glucosamir

|     |     |     |     |     |     |          |     |     |
|-----|-----|-----|-----|-----|-----|----------|-----|-----|
| N/A | N/A | N/A | N/A | N/A | N/A | 6.86E+05 | N/A | N/A |
| N/A | N/A | N/A | N/A | N/A | N/A | 1.91E+06 | N/A | N/A |
| N/A | N/A | N/A | N/A | N/A | N/A | 1.48E+06 | N/A | N/A |
| N/A | N/A | N/A | N/A | N/A | N/A | 8.40E+05 | N/A | N/A |
| N/A | N/A | N/A | N/A | N/A | N/A | 1.92E+06 | N/A | N/A |
| N/A | N/A | N/A | N/A | N/A | N/A | 8.58E+05 | N/A | N/A |
| N/A | N/A | N/A | N/A | N/A | N/A | 1.13E+06 | N/A | N/A |
| N/A | N/A | N/A | N/A | N/A | N/A | 7.30E+05 | N/A | N/A |
| N/A | N/A | N/A | N/A | N/A | N/A | 1.77E+06 | N/A | N/A |
| N/A | N/A | N/A | N/A | N/A | N/A | 8.22E+05 | N/A | N/A |
| N/A | N/A | N/A | N/A | N/A | N/A | 9.67E+05 | N/A | N/A |
| N/A | N/A | N/A | N/A | N/A | N/A | 1.94E+06 | N/A | N/A |
| N/A | N/A | N/A | N/A | N/A | N/A | 3.75E+06 | N/A | N/A |
| N/A | N/A | N/A | N/A | N/A | N/A | 4.32E+06 | N/A | N/A |
| N/A | N/A | N/A | N/A | N/A | N/A | 4.54E+05 | N/A | N/A |
| N/A | N/A | N/A | N/A | N/A | N/A | 7.99E+05 | N/A | N/A |
| N/A | N/A | N/A | N/A | N/A | N/A | 6.27E+06 | N/A | N/A |
| N/A | N/A | N/A | N/A | N/A | N/A | 3.93E+06 | N/A | N/A |
| N/A | N/A | N/A | N/A | N/A | N/A | 1.57E+06 | N/A | N/A |
| N/A | N/A | N/A | N/A | N/A | N/A | 2.20E+06 | N/A | N/A |
| N/A | N/A | N/A | N/A | N/A | N/A | 5.02E+06 | N/A | N/A |

| Glucosamin | Glutathion | Glyceric ac | Glycerol | Glycerol 3- | Glycerophc | Glycine  | Glycocholic | Glycolic aci |
|------------|------------|-------------|----------|-------------|------------|----------|-------------|--------------|
| 1.03E+07   | 3.14E+07   | 6.10E+05    | 4.06E+07 | 2.78E+07    | 2.55E+08   | 7.88E+05 | N/A         | N/A          |
| 1.19E+07   | 7.15E+06   | 5.30E+06    | 1.31E+08 | 2.20E+06    | 3.26E+08   | 1.46E+06 | N/A         | N/A          |
| 3.05E+06   | 5.31E+07   | 6.70E+05    | 1.94E+08 | 7.65E+07    | 2.20E+08   | 1.09E+06 | N/A         | N/A          |
| 1.11E+06   | 8.99E+06   | 7.02E+05    | 7.37E+07 | 1.69E+07    | 8.59E+07   | 4.62E+05 | N/A         | N/A          |
| 1.34E+07   | 1.25E+08   | 4.03E+05    | 2.82E+08 | 9.18E+07    | 3.57E+08   | 1.61E+06 | N/A         | N/A          |
| 7.55E+07   | 8.96E+07   | 4.85E+05    | 3.15E+08 | 2.24E+08    | 7.74E+07   | 7.34E+05 | N/A         | N/A          |
| 5.08E+07   | 4.05E+07   | 6.89E+05    | 1.30E+08 | 2.27E+08    | 2.06E+07   | 2.01E+06 | N/A         | N/A          |
| 1.66E+06   | 9.75E+05   | 9.54E+04    | 1.67E+07 | 7.94E+05    | 5.03E+06   | 4.22E+04 | N/A         | N/A          |
| 2.73E+06   | 2.29E+07   | 4.16E+05    | 1.16E+08 | 2.24E+07    | 7.13E+07   | 6.82E+05 | N/A         | N/A          |
| 2.95E+06   | 2.43E+06   | 5.50E+05    | 6.01E+07 | 7.95E+05    | 7.07E+07   | 1.57E+05 | N/A         | N/A          |
| 4.09E+06   | 1.80E+07   | 5.64E+05    | 1.35E+08 | 6.20E+07    | 7.71E+07   | 3.99E+05 | N/A         | N/A          |
| 1.20E+06   | 2.78E+07   | 5.34E+05    | 1.55E+08 | 5.45E+06    | 8.72E+07   | 7.96E+05 | N/A         | N/A          |
| 3.66E+06   | 3.27E+07   | 4.23E+05    | 5.04E+07 | 4.83E+07    | 1.69E+08   | 4.87E+05 | N/A         | N/A          |
| 3.81E+06   | 3.13E+07   | 7.50E+05    | 8.15E+07 | 3.86E+07    | 8.43E+07   | 1.49E+06 | N/A         | N/A          |
| 1.58E+06   | 3.02E+06   | 2.76E+05    | 7.01E+07 | 4.77E+05    | 1.49E+08   | 1.32E+05 | N/A         | N/A          |
| 2.30E+06   | 3.56E+06   | 2.20E+05    | 3.54E+07 | 6.70E+05    | 9.95E+07   | 8.21E+04 | N/A         | N/A          |
| 2.70E+06   | 7.09E+06   | 4.49E+05    | 2.84E+07 | 4.89E+06    | 1.41E+08   | 1.15E+05 | N/A         | N/A          |
| 2.97E+06   | 1.34E+07   | 8.25E+05    | 1.07E+08 | 6.22E+06    | 7.14E+07   | 3.42E+05 | N/A         | N/A          |
| 3.32E+06   | 3.44E+07   | 6.69E+05    | 1.95E+08 | 2.80E+06    | 8.64E+07   | 1.01E+06 | N/A         | N/A          |
| 2.09E+06   | 5.63E+06   | 1.83E+06    | 2.62E+08 | 1.18E+06    | 8.30E+07   | 8.93E+05 | N/A         | N/A          |
| 1.55E+06   | 3.22E+06   | 4.75E+05    | 4.94E+07 | 6.54E+05    | 1.32E+08   | 2.09E+05 | N/A         | N/A          |

| Glycylproli | Glyoxylic a | Guanidinoz | Guanine | Guanosine | Guanosine | Guanosine | Guanosine | Hexacosan |
|-------------|-------------|------------|---------|-----------|-----------|-----------|-----------|-----------|
| 2.85E+04    | N/A         | N/A        | N/A     | 2.70E+07  | 2.72E+04  | 1.92E+06  | N/A       | N/A       |
| 1.03E+05    | N/A         | N/A        | N/A     | 2.72E+06  | 1.27E+04  | 1.36E+05  | N/A       | N/A       |
| 5.60E+04    | N/A         | N/A        | N/A     | 9.94E+06  | 1.98E+04  | 5.32E+06  | N/A       | N/A       |
| 1.93E+04    | N/A         | N/A        | N/A     | 4.99E+06  | 1.80E+04  | 5.55E+05  | N/A       | N/A       |
| 5.64E+04    | N/A         | N/A        | N/A     | 1.81E+07  | 3.57E+04  | 8.31E+06  | N/A       | N/A       |
| 9.12E+04    | N/A         | N/A        | N/A     | 6.18E+06  | 1.82E+04  | 7.70E+06  | N/A       | N/A       |
| 6.53E+04    | N/A         | N/A        | N/A     | 7.46E+05  | 1.88E+04  | 3.70E+06  | N/A       | N/A       |
| 5.35E+03    | N/A         | N/A        | N/A     | 4.88E+05  | 7.30E+03  | 4.43E+04  | N/A       | N/A       |
| 4.80E+04    | N/A         | N/A        | N/A     | 8.70E+06  | 1.83E+04  | 2.63E+06  | N/A       | N/A       |
| 6.46E+04    | N/A         | N/A        | N/A     | 4.08E+05  | 5.95E+03  | 4.82E+04  | N/A       | N/A       |
| 6.02E+04    | N/A         | N/A        | N/A     | 4.45E+06  | 3.01E+04  | 5.31E+06  | N/A       | N/A       |
| 8.85E+04    | N/A         | N/A        | N/A     | 9.89E+06  | 2.91E+04  | 2.27E+06  | N/A       | N/A       |
| 7.65E+04    | N/A         | N/A        | N/A     | 3.98E+06  | 3.45E+04  | 1.43E+06  | N/A       | N/A       |
| 3.85E+04    | N/A         | N/A        | N/A     | 3.67E+06  | 9.82E+03  | 1.17E+06  | N/A       | N/A       |
| 1.78E+04    | N/A         | N/A        | N/A     | 5.42E+05  | 4.22E+03  | 4.26E+04  | N/A       | N/A       |
| 1.39E+04    | N/A         | N/A        | N/A     | 1.87E+06  | 2.11E+04  | 1.69E+06  | N/A       | N/A       |
| 1.57E+04    | N/A         | N/A        | N/A     | 3.09E+06  | 7.56E+03  | 6.61E+05  | N/A       | N/A       |
| 5.53E+04    | N/A         | N/A        | N/A     | 9.51E+06  | 1.56E+04  | 2.62E+06  | N/A       | N/A       |
| 9.28E+04    | N/A         | N/A        | N/A     | 1.48E+07  | 2.51E+04  | 1.79E+06  | N/A       | N/A       |
| 8.75E+04    | N/A         | N/A        | N/A     | 2.39E+06  | 1.32E+04  | 5.03E+04  | N/A       | N/A       |
| 2.66E+04    | N/A         | N/A        | N/A     | 3.10E+05  | 8.45E+03  | 1.35E+04  | N/A       | N/A       |



| Hexanoylc | Hexose Dip | Hexose Dis | Hexose Dis | Hexose Mc | Hexose Po | Hippuric ac | Histamine | Homoargin |
|-----------|------------|------------|------------|-----------|-----------|-------------|-----------|-----------|
| 1.36E+07  | 1.87E+05   | 6.47E+05   | 4.74E+06   | N/A       | 1.51E+06  | N/A         | 1.10E+08  | 1.93E+06  |
| 5.26E+06  | 7.78E+05   | 3.03E+04   | 1.99E+07   | N/A       | 6.51E+06  | N/A         | 2.06E+08  | 2.73E+06  |
| 9.42E+07  | 2.40E+05   | 1.01E+06   | 2.42E+06   | N/A       | 2.13E+06  | N/A         | 1.51E+08  | 5.28E+06  |
| 6.47E+06  | 1.11E+05   | 1.31E+05   | 1.09E+07   | N/A       | 2.64E+06  | N/A         | 1.10E+08  | 1.45E+06  |
| 9.66E+07  | 1.55E+06   | 1.03E+06   | 4.58E+06   | N/A       | 2.72E+06  | N/A         | 8.16E+07  | 3.02E+06  |
| 2.40E+08  | 2.94E+06   | 5.46E+05   | 4.86E+06   | N/A       | 4.44E+06  | N/A         | 6.70E+07  | 3.44E+06  |
| 2.71E+08  | 2.01E+06   | 9.88E+05   | 2.25E+06   | N/A       | 1.38E+06  | N/A         | 5.02E+07  | 4.09E+06  |
| 4.07E+05  | 7.98E+04   | 2.39E+04   | 1.06E+06   | N/A       | 6.66E+05  | N/A         | 2.34E+06  | 4.84E+04  |
| 5.92E+07  | 1.85E+05   | 3.60E+05   | 4.31E+06   | N/A       | 3.10E+06  | N/A         | 5.08E+07  | 4.82E+06  |
| 6.98E+06  | 7.72E+04   | 2.31E+04   | 1.08E+06   | N/A       | 1.44E+06  | N/A         | 1.83E+07  | 4.72E+05  |
| 1.49E+08  | 1.06E+05   | 2.93E+05   | 6.60E+06   | N/A       | 2.29E+06  | N/A         | 8.80E+07  | 8.33E+05  |
| 7.57E+06  | 2.87E+05   | 9.02E+05   | 2.30E+07   | N/A       | 6.36E+06  | N/A         | 8.36E+07  | 2.95E+06  |
| 6.09E+07  | 1.88E+05   | 2.08E+05   | 7.52E+06   | N/A       | 6.56E+06  | N/A         | 3.51E+07  | 5.38E+06  |
| 2.05E+08  | 3.33E+05   | 4.01E+05   | 7.08E+06   | N/A       | 5.46E+06  | N/A         | 5.45E+07  | 2.55E+06  |
| 1.25E+06  | 5.78E+04   | 9.17E+03   | 7.06E+06   | N/A       | 1.56E+06  | N/A         | 1.12E+08  | 3.31E+05  |
| 1.83E+06  | 4.09E+06   | 9.13E+04   | 9.01E+06   | N/A       | 4.43E+06  | N/A         | 1.50E+07  | 1.86E+06  |
| 1.01E+07  | 1.77E+05   | 9.91E+04   | 3.98E+06   | N/A       | 1.21E+06  | N/A         | 3.04E+07  | 2.97E+05  |
| 6.64E+06  | 3.79E+05   | 3.03E+05   | 5.45E+06   | N/A       | 2.40E+06  | N/A         | 6.74E+07  | 1.30E+06  |
| 9.03E+07  | 2.06E+05   | 3.43E+05   | 6.17E+06   | N/A       | 3.44E+06  | N/A         | 3.76E+07  | 7.13E+06  |
| 4.66E+07  | 1.29E+05   | 4.18E+04   | 1.92E+06   | N/A       | 1.51E+06  | N/A         | 7.24E+07  | 1.97E+06  |
| 2.83E+06  | 1.05E+05   | 2.65E+04   | 1.82E+07   | N/A       | 2.95E+06  | N/A         | 6.50E+07  | 5.77E+05  |



| Hypoxanth | Imidazole | Indole | Indole-3-ca | Indoxyl sul | Inosine dip | Inosine mo | Inosine triç | Inosine_ne |
|-----------|-----------|--------|-------------|-------------|-------------|------------|--------------|------------|
| 1.45E+08  | N/A       | N/A    | N/A         | 3.58E+06    | 3.00E+06    | 2.10E+07   | N/A          | 1.54E+08   |
| 1.98E+08  | N/A       | N/A    | N/A         | 1.22E+07    | 4.26E+05    | 5.73E+05   | N/A          | 1.33E+08   |
| 1.84E+08  | N/A       | N/A    | N/A         | 2.93E+06    | 4.71E+06    | 6.52E+07   | N/A          | 1.75E+08   |
| 1.29E+08  | N/A       | N/A    | N/A         | 2.11E+06    | 2.74E+06    | 5.57E+06   | N/A          | 1.26E+08   |
| 2.78E+08  | N/A       | N/A    | N/A         | 3.69E+06    | 1.34E+06    | 9.10E+07   | N/A          | 2.03E+08   |
| 1.84E+08  | N/A       | N/A    | N/A         | 1.60E+06    | 1.83E+06    | 1.21E+08   | N/A          | 1.99E+08   |
| 5.60E+07  | N/A       | N/A    | N/A         | 2.24E+05    | 5.86E+06    | 1.40E+08   | N/A          | 1.07E+08   |
| 2.04E+06  | N/A       | N/A    | N/A         | 3.11E+04    | 1.17E+06    | 1.38E+06   | N/A          | 1.24E+07   |
| 2.09E+08  | N/A       | N/A    | N/A         | 4.98E+06    | 3.36E+06    | 5.51E+07   | N/A          | 2.04E+08   |
| 1.00E+08  | N/A       | N/A    | N/A         | 1.24E+06    | 1.21E+06    | 9.18E+05   | N/A          | 9.32E+07   |
| 1.61E+08  | N/A       | N/A    | N/A         | 1.77E+06    | 6.04E+06    | 7.53E+07   | N/A          | 1.91E+08   |
| 2.51E+08  | N/A       | N/A    | N/A         | 2.32E+06    | 5.81E+05    | 6.41E+07   | N/A          | 2.10E+08   |
| 2.47E+08  | N/A       | N/A    | N/A         | 1.44E+06    | 3.06E+06    | 2.74E+07   | N/A          | 2.14E+08   |
| 2.87E+08  | N/A       | N/A    | N/A         | 2.58E+05    | 3.18E+06    | 1.37E+07   | N/A          | 1.82E+08   |
| 4.26E+07  | N/A       | N/A    | N/A         | 4.65E+05    | 3.25E+05    | 2.84E+05   | N/A          | 6.96E+07   |
| 7.89E+07  | N/A       | N/A    | N/A         | 1.91E+06    | 5.88E+06    | 5.79E+07   | N/A          | 1.18E+08   |
| 9.10E+07  | N/A       | N/A    | N/A         | 9.06E+05    | 3.77E+06    | 1.56E+07   | N/A          | 1.29E+08   |
| 1.85E+08  | N/A       | N/A    | N/A         | 1.65E+06    | 1.15E+06    | 6.36E+07   | N/A          | 1.89E+08   |
| 2.38E+08  | N/A       | N/A    | N/A         | 4.83E+06    | 7.00E+05    | 5.53E+07   | N/A          | 2.25E+08   |
| 1.80E+08  | N/A       | N/A    | N/A         | 2.76E+06    | 2.98E+05    | 5.22E+05   | N/A          | 1.41E+08   |
| 6.58E+07  | N/A       | N/A    | N/A         | 1.31E+05    | 2.52E+05    | 1.20E+05   | N/A          | 7.55E+07   |

| Isocitric aci | Isovaleryl | Isovalerylgl | Itaconic aci | Ketoleucin | Kynurenic | L-Acetylcar | L-Ascorbic | L-Asparagir |
|---------------|------------|--------------|--------------|------------|-----------|-------------|------------|-------------|
| 2.15E+07      | 9.59E+07   | N/A          | 1.16E+06     | 1.87E+06   | N/A       | 1.48E+09    | N/A        | 2.52E+06    |
| 5.63E+07      | 1.15E+08   | N/A          | 1.10E+06     | 1.95E+06   | N/A       | 1.33E+09    | N/A        | 5.53E+06    |
| 4.15E+07      | 1.95E+08   | N/A          | 1.09E+06     | 1.65E+06   | N/A       | 1.45E+09    | N/A        | 2.81E+06    |
| 3.81E+07      | 3.49E+07   | N/A          | 1.25E+06     | 2.26E+06   | N/A       | 1.49E+09    | N/A        | 1.63E+06    |
| 5.39E+07      | 3.91E+08   | N/A          | 8.90E+05     | 1.24E+06   | N/A       | 1.46E+09    | N/A        | 4.79E+06    |
| 9.04E+07      | 2.04E+08   | N/A          | 1.57E+06     | 2.25E+06   | N/A       | 1.33E+09    | N/A        | 4.19E+06    |
| 9.48E+07      | 2.56E+08   | N/A          | 1.10E+06     | 2.03E+06   | N/A       | 1.39E+09    | N/A        | 6.28E+06    |
| 2.42E+06      | 3.30E+06   | N/A          | 7.59E+05     | 1.23E+06   | N/A       | 5.32E+08    | N/A        | 9.14E+04    |
| 7.45E+07      | 1.22E+08   | N/A          | 1.20E+06     | 2.24E+06   | N/A       | 1.53E+09    | N/A        | 3.01E+06    |
| 3.82E+06      | 2.63E+07   | N/A          | 8.02E+05     | 1.16E+06   | N/A       | 1.26E+09    | N/A        | 6.74E+05    |
| 2.33E+07      | 1.29E+08   | N/A          | 1.11E+06     | 1.17E+06   | N/A       | 1.48E+09    | N/A        | 1.47E+06    |
| 7.40E+07      | 1.36E+08   | N/A          | 1.31E+06     | 2.25E+06   | N/A       | 1.41E+09    | N/A        | 2.45E+06    |
| 4.78E+07      | 2.44E+08   | N/A          | 8.45E+05     | 1.28E+06   | N/A       | 1.58E+09    | N/A        | 1.77E+06    |
| 1.44E+08      | 4.05E+08   | N/A          | 1.68E+06     | 2.71E+06   | N/A       | 1.44E+09    | N/A        | 3.01E+06    |
| 1.04E+06      | 1.10E+07   | N/A          | 9.19E+05     | 1.46E+06   | N/A       | 8.23E+08    | N/A        | 5.54E+05    |
| 3.49E+07      | 5.88E+07   | N/A          | 1.35E+06     | 2.33E+06   | N/A       | 1.44E+09    | N/A        | 5.78E+05    |
| 2.88E+07      | 3.04E+07   | N/A          | 1.31E+06     | 2.11E+06   | N/A       | 1.51E+09    | N/A        | 6.93E+05    |
| 7.28E+07      | 1.65E+08   | N/A          | 1.12E+06     | 2.17E+06   | N/A       | 1.57E+09    | N/A        | 1.59E+06    |
| 6.33E+07      | 1.74E+08   | N/A          | 1.07E+06     | 1.75E+06   | N/A       | 1.44E+09    | N/A        | 4.98E+06    |
| 4.83E+07      | 2.47E+08   | N/A          | 1.10E+06     | 1.85E+06   | N/A       | 1.34E+09    | N/A        | 4.50E+06    |
| 3.12E+06      | 2.47E+07   | N/A          | 9.56E+05     | 1.64E+06   | N/A       | 1.41E+09    | N/A        | 1.27E+06    |

| L-Aspartic | L-Carnitine | L-Cystathio | L-Cystine | L-Glutamic | L-Glutamin | L-Glutaryl | L-Histidine | L-Histidinol |
|------------|-------------|-------------|-----------|------------|------------|------------|-------------|--------------|
| 1.00E+07   | 3.27E+07    | N/A         | 2.20E+06  | 3.74E+07   | 2.11E+08   | 3.06E+06   | 1.75E+07    | N/A          |
| 5.34E+07   | 5.68E+07    | N/A         | 2.62E+06  | 7.39E+07   | 2.98E+08   | 6.61E+06   | 3.41E+07    | N/A          |
| 1.12E+07   | 4.38E+07    | N/A         | 1.90E+06  | 5.75E+07   | 3.45E+08   | 6.55E+06   | 3.95E+07    | N/A          |
| 3.70E+06   | 2.87E+07    | N/A         | 1.44E+05  | 1.98E+07   | 2.15E+08   | 3.07E+06   | 2.38E+07    | N/A          |
| 1.60E+07   | 7.39E+07    | N/A         | 1.16E+06  | 5.66E+07   | 3.67E+08   | 1.15E+07   | 3.41E+07    | N/A          |
| 5.66E+07   | 7.83E+07    | N/A         | 1.86E+05  | 6.38E+07   | 3.68E+08   | 1.30E+07   | 4.43E+07    | N/A          |
| 4.71E+07   | 7.31E+07    | N/A         | 1.28E+05  | 6.16E+07   | 2.33E+08   | 4.91E+06   | 6.33E+07    | N/A          |
| 4.57E+05   | 1.02E+07    | N/A         | 1.28E+04  | 2.17E+06   | 8.28E+07   | 1.17E+06   | 1.94E+06    | N/A          |
| 2.61E+07   | 6.17E+07    | N/A         | 1.94E+05  | 1.85E+07   | 2.73E+08   | 5.34E+06   | 3.73E+07    | N/A          |
| 3.71E+06   | 4.50E+07    | N/A         | 3.17E+04  | 5.54E+06   | 1.87E+08   | 3.09E+06   | 1.39E+07    | N/A          |
| 1.56E+07   | 6.85E+07    | N/A         | 8.50E+04  | 2.70E+07   | 1.97E+08   | 1.26E+07   | 2.10E+07    | N/A          |
| 1.33E+07   | 5.93E+07    | N/A         | 8.51E+05  | 2.08E+07   | 2.38E+08   | 5.83E+06   | 4.38E+07    | N/A          |
| 4.79E+06   | 7.57E+07    | N/A         | 8.15E+04  | 1.50E+07   | 2.18E+08   | 1.48E+07   | 3.78E+07    | N/A          |
| 1.06E+07   | 4.93E+07    | N/A         | 3.14E+05  | 3.13E+07   | 2.46E+08   | 6.62E+06   | 5.49E+07    | N/A          |
| 2.13E+06   | 1.27E+07    | N/A         | 8.32E+04  | 5.41E+06   | 8.92E+07   | 1.42E+06   | 1.08E+07    | N/A          |
| 2.38E+06   | 3.76E+07    | N/A         | 3.93E+04  | 2.37E+06   | 1.42E+08   | 4.00E+06   | 1.56E+07    | N/A          |
| 4.00E+06   | 4.75E+07    | N/A         | 3.63E+04  | 6.02E+06   | 1.16E+08   | 1.41E+06   | 8.91E+06    | N/A          |
| 3.91E+06   | 5.64E+07    | N/A         | 3.36E+04  | 9.47E+06   | 1.78E+08   | 7.54E+06   | 3.61E+07    | N/A          |
| 3.82E+07   | 7.15E+07    | N/A         | 5.08E+05  | 3.82E+07   | 2.99E+08   | 4.92E+06   | 4.73E+07    | N/A          |
| 2.22E+07   | 4.43E+07    | N/A         | 6.29E+05  | 3.96E+07   | 2.12E+08   | 1.59E+07   | 6.75E+07    | N/A          |
| 6.83E+06   | 3.07E+07    | N/A         | 1.85E+05  | 9.29E+06   | 1.48E+08   | 1.97E+06   | 2.22E+07    | N/A          |

| L-Homoser | L-Kynurenin | L-Lactic aci | L-Lysine | L-Methioni | L-Palmitoyl | L-Phenylal | L-Proline | L-Serine |
|-----------|-------------|--------------|----------|------------|-------------|------------|-----------|----------|
| N/A       | 9.44E+06    | 3.18E+08     | 2.57E+08 | 9.76E+07   | 6.43E+07    | 1.08E+08   | 9.65E+07  | 7.43E+06 |
| N/A       | 9.40E+06    | 9.31E+08     | 3.86E+08 | 1.90E+08   | 3.36E+07    | 2.12E+08   | 1.52E+08  | 1.57E+07 |
| N/A       | 5.81E+06    | 9.32E+08     | 4.48E+08 | 1.07E+08   | 2.04E+08    | 7.35E+07   | 1.79E+08  | 8.98E+06 |
| N/A       | 2.16E+06    | 3.23E+08     | 2.48E+08 | 7.32E+07   | 3.34E+07    | 6.94E+07   | 7.41E+07  | 5.79E+06 |
| N/A       | 8.11E+06    | 1.10E+09     | 4.47E+08 | 1.31E+08   | 4.96E+08    | 1.30E+08   | 1.18E+08  | 8.43E+06 |
| N/A       | 9.46E+05    | 1.06E+09     | 4.56E+08 | 8.32E+07   | 1.27E+09    | 1.01E+08   | 6.92E+07  | 1.41E+07 |
| N/A       | 9.03E+05    | 1.12E+09     | 3.21E+08 | 1.77E+08   | 1.11E+09    | 2.24E+08   | 1.02E+08  | 1.55E+07 |
| N/A       | 2.81E+05    | 8.96E+06     | 4.56E+07 | 2.32E+07   | 1.42E+07    | 1.29E+07   | 4.84E+06  | 3.49E+05 |
| N/A       | 8.80E+05    | 9.69E+08     | 3.42E+08 | 1.08E+08   | 3.01E+08    | 1.20E+08   | 6.35E+07  | 1.15E+07 |
| N/A       | 3.06E+05    | 2.67E+08     | 1.85E+08 | 6.32E+07   | 1.64E+07    | 7.13E+07   | 2.68E+07  | 2.63E+06 |
| N/A       | 6.03E+05    | 7.09E+08     | 2.43E+08 | 1.10E+08   | 1.01E+09    | 8.90E+07   | 4.62E+07  | 6.41E+06 |
| N/A       | 1.77E+06    | 1.12E+09     | 2.82E+08 | 1.05E+08   | 2.14E+08    | 1.32E+08   | 7.51E+07  | 8.76E+06 |
| N/A       | 7.64E+05    | 8.49E+08     | 2.65E+08 | 7.89E+07   | 1.46E+08    | 8.28E+07   | 4.39E+07  | 6.87E+06 |
| N/A       | 1.88E+06    | 7.73E+08     | 3.16E+08 | 2.03E+08   | 1.08E+08    | 1.97E+08   | 1.44E+08  | 1.55E+07 |
| N/A       | 3.01E+05    | 3.63E+07     | 8.97E+07 | 4.10E+07   | 1.09E+07    | 4.73E+07   | 2.46E+07  | 2.29E+06 |
| N/A       | 1.28E+06    | 1.82E+08     | 1.51E+08 | 5.37E+07   | 6.42E+07    | 3.47E+07   | 1.45E+07  | 1.42E+06 |
| N/A       | 1.16E+06    | 1.31E+08     | 1.24E+08 | 6.65E+07   | 1.73E+08    | 5.14E+07   | 2.39E+07  | 2.93E+06 |
| N/A       | 1.10E+06    | 6.58E+08     | 1.91E+08 | 7.43E+07   | 2.26E+08    | 8.78E+07   | 3.90E+07  | 4.81E+06 |
| N/A       | 1.01E+06    | 1.07E+09     | 3.73E+08 | 1.60E+08   | 4.74E+08    | 1.69E+08   | 8.42E+07  | 1.48E+07 |
| N/A       | 1.13E+06    | 6.17E+08     | 2.86E+08 | 3.48E+08   | 1.90E+08    | 3.16E+08   | 1.93E+08  | 2.65E+07 |
| N/A       | 3.73E+05    | 1.00E+08     | 1.70E+08 | 1.49E+08   | 2.28E+07    | 1.19E+08   | 5.64E+07  | 6.05E+06 |

| L-Threonin | L-Tryptoph | L-Tyrosine | L-Valine | L-isoleucin | L-leucine | LTB4 | LXA4 | Lanosterin |
|------------|------------|------------|----------|-------------|-----------|------|------|------------|
| 7.31E+06   | 1.54E+07   | 2.84E+06   | 2.60E+06 | 2.73E+08    | 3.40E+08  | N/A  | N/A  | 9.86E+05   |
| 1.53E+07   | 2.77E+07   | 5.22E+06   | 4.66E+06 | 4.17E+08    | 4.79E+08  | N/A  | N/A  | 1.12E+06   |
| 1.08E+07   | 9.33E+06   | 1.97E+06   | 2.57E+06 | 1.98E+08    | 2.53E+08  | N/A  | N/A  | 6.36E+05   |
| 6.12E+06   | 1.11E+07   | 1.73E+06   | 2.01E+06 | 2.12E+08    | 2.71E+08  | N/A  | N/A  | 9.28E+05   |
| 1.26E+07   | 1.25E+07   | 2.71E+06   | 2.85E+06 | 2.69E+08    | 3.22E+08  | N/A  | N/A  | 5.87E+05   |
| 1.44E+07   | 8.53E+06   | 1.94E+06   | 3.52E+06 | 3.37E+08    | 3.84E+08  | N/A  | N/A  | 3.21E+04   |
| 1.32E+07   | 2.60E+07   | 4.83E+06   | 5.78E+06 | 4.72E+08    | 5.41E+08  | N/A  | N/A  | 1.54E+05   |
| 3.46E+05   | 2.39E+06   | 6.41E+05   | 1.22E+06 | 2.67E+07    | 4.02E+07  | N/A  | N/A  | 1.07E+06   |
| 7.67E+06   | 1.40E+07   | 2.75E+06   | 3.09E+06 | 3.36E+08    | 3.94E+08  | N/A  | N/A  | 1.13E+06   |
| 3.08E+06   | 1.56E+07   | 2.26E+06   | 1.51E+06 | 1.81E+08    | 2.28E+08  | N/A  | N/A  | 6.11E+05   |
| 6.04E+06   | 1.31E+07   | 2.42E+06   | 2.45E+06 | 2.62E+08    | 3.05E+08  | N/A  | N/A  | 5.77E+05   |
| 1.03E+07   | 1.12E+07   | 2.22E+06   | 3.19E+06 | 3.31E+08    | 3.91E+08  | N/A  | N/A  | 5.82E+05   |
| 5.55E+06   | 1.57E+07   | 1.88E+06   | 2.28E+06 | 2.53E+08    | 2.98E+08  | N/A  | N/A  | 1.07E+06   |
| 1.46E+07   | 2.65E+07   | 4.31E+06   | 6.13E+06 | 4.46E+08    | 5.05E+08  | N/A  | N/A  | 8.32E+05   |
| 2.07E+06   | 8.11E+06   | 1.61E+06   | 1.18E+06 | 1.17E+08    | 1.70E+08  | N/A  | N/A  | 1.16E+06   |
| 1.63E+06   | 9.33E+06   | 1.25E+06   | 1.10E+06 | 8.57E+07    | 1.17E+08  | N/A  | N/A  | 7.03E+05   |
| 2.50E+06   | 8.51E+06   | 1.81E+06   | 1.34E+06 | 1.52E+08    | 2.01E+08  | N/A  | N/A  | 9.87E+05   |
| 4.28E+06   | 1.46E+07   | 1.68E+06   | 1.83E+06 | 2.29E+08    | 2.80E+08  | N/A  | N/A  | 9.43E+05   |
| 1.13E+07   | 1.50E+07   | 4.10E+06   | 4.26E+06 | 4.13E+08    | 4.71E+08  | N/A  | N/A  | 1.11E+06   |
| 2.06E+07   | 9.27E+07   | 1.05E+07   | 1.12E+07 | 6.02E+08    | 6.74E+08  | N/A  | N/A  | 1.40E+06   |
| 4.78E+06   | 2.54E+07   | 4.10E+06   | 2.53E+06 | 2.79E+08    | 3.45E+08  | N/A  | N/A  | 1.22E+06   |

Lathostero Linoleic aci Linoleylcar Lipoic acid LysoPC(16: LysoPC(18: LysoPC(22: LysoPC(24: Malic acid

|          |          |          |     |          |          |     |     |          |
|----------|----------|----------|-----|----------|----------|-----|-----|----------|
| 1.12E+05 | 3.05E+05 | 4.17E+05 | N/A | 2.06E+05 | 4.02E+06 | N/A | N/A | 1.27E+08 |
| 1.15E+05 | 1.72E+06 | 8.18E+05 | N/A | 4.04E+05 | 5.33E+06 | N/A | N/A | 2.54E+08 |
| 2.10E+05 | 5.90E+05 | 1.87E+06 | N/A | 2.17E+05 | 6.67E+06 | N/A | N/A | 2.18E+08 |
| 9.37E+03 | 4.90E+05 | 3.49E+05 | N/A | 1.83E+05 | 3.37E+06 | N/A | N/A | 1.20E+08 |
| 1.76E+05 | 8.50E+05 | 8.40E+06 | N/A | 1.95E+05 | 1.78E+06 | N/A | N/A | 4.01E+08 |
| 6.07E+05 | 6.86E+05 | 4.70E+07 | N/A | 1.49E+05 | 9.02E+05 | N/A | N/A | 5.41E+08 |
| 4.06E+05 | 1.21E+05 | 4.08E+07 | N/A | 8.68E+04 | 8.47E+05 | N/A | N/A | 4.51E+08 |
| 3.42E+04 | 2.70E+06 | 3.15E+05 | N/A | 1.11E+05 | 5.60E+05 | N/A | N/A | 9.48E+06 |
| 3.39E+04 | 2.48E+05 | 4.54E+06 | N/A | 1.37E+05 | 1.10E+06 | N/A | N/A | 3.63E+08 |
| 1.18E+04 | 2.51E+06 | 1.68E+06 | N/A | 2.68E+05 | 1.83E+06 | N/A | N/A | 1.05E+08 |
| 2.84E+05 | 6.28E+05 | 4.08E+07 | N/A | 2.53E+05 | 1.20E+06 | N/A | N/A | 2.86E+08 |
| 4.18E+05 | 8.59E+05 | 3.61E+06 | N/A | 3.56E+05 | 2.61E+06 | N/A | N/A | 3.18E+08 |
| 3.91E+04 | 5.97E+05 | 8.60E+06 | N/A | 2.53E+05 | 7.97E+05 | N/A | N/A | 1.95E+08 |
| 6.15E+03 | 6.73E+05 | 1.52E+06 | N/A | 9.73E+05 | 3.20E+06 | N/A | N/A | 1.84E+08 |
| 1.15E+05 | 1.10E+06 | 1.86E+05 | N/A | 1.18E+05 | 1.32E+06 | N/A | N/A | 1.86E+07 |
| 2.69E+03 | 6.85E+05 | 2.28E+06 | N/A | 1.75E+05 | 1.19E+06 | N/A | N/A | 7.34E+07 |
| 3.74E+04 | 3.89E+05 | 1.79E+06 | N/A | 1.16E+05 | 1.58E+06 | N/A | N/A | 1.02E+08 |
| 3.65E+04 | 9.74E+05 | 7.11E+06 | N/A | 1.89E+05 | 2.62E+06 | N/A | N/A | 2.05E+08 |
| 1.36E+05 | 6.52E+05 | 1.48E+07 | N/A | 1.79E+05 | 9.30E+05 | N/A | N/A | 3.78E+08 |
| 4.51E+04 | 2.27E+06 | 2.46E+06 | N/A | 4.49E+05 | 1.68E+06 | N/A | N/A | 8.28E+07 |
| 1.49E+04 | 1.19E+06 | 5.11E+05 | N/A | 1.04E+05 | 3.28E+05 | N/A | N/A | 7.93E+07 |



| Malondialc | Malonic ac | Malonylcar | Melatonin | Metanephri | Methioninε | Methylcob | Methylcyst | Methylgua |
|------------|------------|------------|-----------|------------|------------|-----------|------------|-----------|
| N/A        | 3.13E+06   | 2.42E+08   | N/A       | N/A        | 9.45E+04   | N/A       | 8.54E+05   | N/A       |
| N/A        | 3.04E+06   | 2.49E+08   | N/A       | N/A        | 2.63E+05   | N/A       | 1.52E+06   | N/A       |
| N/A        | 2.83E+06   | 3.71E+08   | N/A       | N/A        | 6.66E+05   | N/A       | 8.00E+05   | N/A       |
| N/A        | 3.78E+06   | 3.40E+08   | N/A       | N/A        | 6.01E+04   | N/A       | 3.79E+05   | N/A       |
| N/A        | 2.55E+06   | 4.46E+08   | N/A       | N/A        | 2.80E+05   | N/A       | 1.12E+06   | N/A       |
| N/A        | 2.44E+06   | 5.31E+08   | N/A       | N/A        | 2.51E+05   | N/A       | 2.19E+06   | N/A       |
| N/A        | 2.76E+06   | 3.49E+08   | N/A       | N/A        | 2.20E+05   | N/A       | 1.24E+06   | N/A       |
| N/A        | 2.53E+06   | 5.04E+06   | N/A       | N/A        | 3.12E+04   | N/A       | 2.34E+04   | N/A       |
| N/A        | 2.95E+06   | 2.45E+08   | N/A       | N/A        | 1.85E+05   | N/A       | 1.21E+06   | N/A       |
| N/A        | 2.55E+06   | 1.23E+08   | N/A       | N/A        | 1.50E+05   | N/A       | 1.97E+05   | N/A       |
| N/A        | 2.71E+06   | 3.72E+08   | N/A       | N/A        | 1.38E+05   | N/A       | 1.03E+06   | N/A       |
| N/A        | 4.15E+06   | 3.55E+08   | N/A       | N/A        | 2.59E+05   | N/A       | 1.47E+06   | N/A       |
| N/A        | 2.69E+06   | 3.57E+08   | N/A       | N/A        | 1.08E+05   | N/A       | 1.14E+06   | N/A       |
| N/A        | 2.96E+06   | 6.24E+08   | N/A       | N/A        | 1.13E+05   | N/A       | 1.19E+06   | N/A       |
| N/A        | 3.65E+06   | 5.72E+07   | N/A       | N/A        | 3.07E+04   | N/A       | 9.40E+04   | N/A       |
| N/A        | 3.82E+06   | 6.73E+07   | N/A       | N/A        | 3.09E+05   | N/A       | 2.73E+05   | N/A       |
| N/A        | 2.87E+06   | 2.60E+08   | N/A       | N/A        | 3.80E+04   | N/A       | 1.79E+05   | N/A       |
| N/A        | 2.49E+06   | 2.85E+08   | N/A       | N/A        | 8.21E+04   | N/A       | 5.65E+05   | N/A       |
| N/A        | 2.37E+06   | 2.71E+08   | N/A       | N/A        | 2.17E+05   | N/A       | 1.64E+06   | N/A       |
| N/A        | 3.31E+06   | 4.74E+08   | N/A       | N/A        | 2.23E+05   | N/A       | 1.20E+06   | N/A       |
| N/A        | 3.42E+06   | 8.57E+07   | N/A       | N/A        | 1.59E+05   | N/A       | 2.10E+05   | N/A       |

| Methylmal | Methylsucc | Mevalonic | Myoinositc | Myristoylc | N-Acetyl-L- | N-Acetyl-gl | N-Acetylas | N-Acetylglu |
|-----------|------------|-----------|------------|------------|-------------|-------------|------------|-------------|
| 1.48E+06  | 2.64E+06   | N/A       | 1.07E+07   | 1.72E+07   | 7.17E+06    | 3.35E+06    | 1.15E+06   | N/A         |
| 2.87E+06  | 1.08E+06   | N/A       | 7.88E+06   | 1.56E+07   | 1.10E+07    | 1.04E+07    | 1.38E+06   | N/A         |
| 6.41E+06  | 1.03E+06   | N/A       | 1.63E+07   | 5.22E+07   | 6.66E+06    | 3.24E+06    | 1.69E+05   | N/A         |
| 2.19E+06  | 1.35E+06   | N/A       | 6.09E+06   | 7.01E+06   | 2.14E+06    | 1.36E+06    | 2.23E+05   | N/A         |
| 1.83E+06  | 8.62E+05   | N/A       | 1.51E+07   | 2.09E+08   | 5.82E+06    | 4.49E+06    | 1.68E+06   | N/A         |
| 2.18E+06  | 1.22E+06   | N/A       | 4.53E+07   | 6.89E+08   | 5.48E+06    | 8.96E+05    | 2.40E+06   | N/A         |
| 8.32E+06  | 9.78E+05   | N/A       | 6.94E+06   | 4.48E+08   | 1.62E+07    | 7.26E+05    | 4.82E+06   | N/A         |
| 8.69E+05  | 9.15E+05   | N/A       | 4.74E+05   | 3.48E+06   | 1.79E+05    | 1.09E+05    | 2.64E+03   | N/A         |
| 4.33E+06  | 1.25E+06   | N/A       | 4.81E+06   | 1.32E+08   | 3.37E+06    | 1.85E+06    | 1.13E+06   | N/A         |
| 6.62E+05  | 1.27E+06   | N/A       | 1.80E+06   | 1.14E+07   | 8.89E+04    | 4.52E+05    | 2.13E+04   | N/A         |
| 4.28E+06  | 7.45E+05   | N/A       | 9.08E+06   | 2.94E+08   | 2.12E+06    | 9.58E+05    | 4.36E+05   | N/A         |
| 2.87E+06  | 1.07E+06   | N/A       | 9.19E+06   | 9.63E+07   | 1.55E+06    | 1.90E+06    | 5.49E+05   | N/A         |
| 2.49E+06  | 1.09E+06   | N/A       | 8.00E+06   | 1.03E+08   | 4.53E+06    | 1.45E+06    | 6.93E+05   | N/A         |
| 4.24E+06  | 1.00E+06   | N/A       | 7.81E+06   | 5.22E+07   | 3.53E+06    | 1.16E+06    | 1.18E+06   | N/A         |
| 7.46E+05  | 1.15E+06   | N/A       | 6.52E+06   | 5.14E+06   | 4.30E+05    | 3.67E+05    | 9.54E+03   | N/A         |
| 5.75E+05  | 9.84E+05   | N/A       | 1.59E+06   | 2.67E+07   | 7.96E+05    | 2.16E+05    | 2.25E+05   | N/A         |
| 9.57E+05  | 1.06E+06   | N/A       | 8.29E+06   | 7.79E+07   | 9.71E+05    | 3.91E+05    | 1.07E+05   | N/A         |
| 1.13E+06  | 1.17E+06   | N/A       | 5.54E+06   | 1.05E+08   | 8.94E+06    | 7.05E+05    | 1.85E+05   | N/A         |
| 2.08E+06  | 9.80E+05   | N/A       | 8.36E+06   | 1.72E+08   | 4.62E+06    | 2.12E+06    | 1.52E+06   | N/A         |
| 5.61E+06  | 1.28E+06   | N/A       | 6.24E+06   | 1.36E+08   | 4.25E+06    | 2.32E+06    | 2.46E+05   | N/A         |
| 2.64E+05  | 1.03E+06   | N/A       | 5.42E+06   | 1.49E+07   | 6.88E+05    | 4.24E+05    | 1.04E+05   | N/A         |

| N-Acetylpu   | N-acetylser  | N-alpha-Ac | N-methylpl   | N-oleoyletl  | N5-Formyl- NAD+ | NADH |
|--------------|--------------|------------|--------------|--------------|-----------------|------|
| 5.25E+05 N/A | 4.90E+05 N/A | N/A        | 2.55E+05 N/A | 3.78E+05 N/A |                 |      |
| 9.58E+05 N/A | 9.25E+05 N/A | N/A        | 6.62E+05 N/A | 1.14E+04 N/A |                 |      |
| 1.01E+06 N/A | 3.71E+05 N/A | N/A        | 1.40E+06 N/A | 4.19E+06 N/A |                 |      |
| 5.53E+05 N/A | 3.51E+05 N/A | N/A        | 7.61E+03 N/A | 5.28E+05 N/A |                 |      |
| 8.76E+05 N/A | 4.27E+05 N/A | N/A        | 9.14E+05 N/A | 5.67E+05 N/A |                 |      |
| 8.36E+05 N/A | 3.19E+05 N/A | N/A        | 8.51E+05 N/A | 3.81E+05 N/A |                 |      |
| 6.58E+05 N/A | 4.71E+05 N/A | N/A        | 4.14E+05 N/A | 4.23E+07 N/A |                 |      |
| 3.88E+05 N/A | 9.12E+05 N/A | N/A        | 4.50E+05 N/A | 2.27E+04 N/A |                 |      |
| 7.07E+05 N/A | 1.86E+05 N/A | N/A        | 2.73E+04 N/A | 3.27E+06 N/A |                 |      |
| 3.25E+05 N/A | 2.74E+05 N/A | N/A        | 1.11E+04 N/A | 3.11E+04 N/A |                 |      |
| 5.61E+05 N/A | 2.34E+05 N/A | N/A        | 9.38E+05 N/A | 4.48E+06 N/A |                 |      |
| 6.84E+05 N/A | 2.11E+05 N/A | N/A        | 1.53E+06 N/A | 3.26E+05 N/A |                 |      |
| 5.12E+05 N/A | 3.83E+05 N/A | N/A        | 2.31E+05 N/A | 2.58E+06 N/A |                 |      |
| 8.14E+05 N/A | 4.24E+05 N/A | N/A        | 1.56E+04 N/A | 1.94E+06 N/A |                 |      |
| 4.07E+05 N/A | 5.90E+04 N/A | N/A        | 5.57E+05 N/A | 2.00E+04 N/A |                 |      |
| 3.71E+05 N/A | 8.96E+04 N/A | N/A        | 1.32E+03 N/A | 2.19E+04 N/A |                 |      |
| 3.70E+05 N/A | 1.18E+05 N/A | N/A        | 8.34E+04 N/A | 8.49E+04 N/A |                 |      |
| 3.97E+05 N/A | 9.85E+04 N/A | N/A        | 6.91E+04 N/A | 5.25E+04 N/A |                 |      |
| 8.69E+05 N/A | 2.58E+05 N/A | N/A        | 2.74E+05 N/A | 1.79E+05 N/A |                 |      |
| 1.25E+06 N/A | 1.16E+06 N/A | N/A        | 2.47E+05 N/A | 2.49E+04 N/A |                 |      |
| 4.59E+05 N/A | 2.65E+05 N/A | N/A        | 3.89E+04 N/A | 1.29E+04 N/A |                 |      |

| NADP+ | NADPH | Neopterin | Niacinamid | Nicotinami | Nicotinic a | Norepinepl | Normetanε | O-Phospho |
|-------|-------|-----------|------------|------------|-------------|------------|-----------|-----------|
| N/A   | N/A   | N/A       | 2.53E+08   | N/A        | N/A         | N/A        | N/A       | 1.28E+06  |
| N/A   | N/A   | N/A       | 4.13E+08   | N/A        | N/A         | N/A        | N/A       | 2.98E+06  |
| N/A   | N/A   | N/A       | 3.71E+08   | N/A        | N/A         | N/A        | N/A       | 1.05E+06  |
| N/A   | N/A   | N/A       | 2.08E+08   | N/A        | N/A         | N/A        | N/A       | 3.71E+05  |
| N/A   | N/A   | N/A       | 5.47E+08   | N/A        | N/A         | N/A        | N/A       | 1.06E+06  |
| N/A   | N/A   | N/A       | 4.70E+08   | N/A        | N/A         | N/A        | N/A       | 2.35E+05  |
| N/A   | N/A   | N/A       | 4.03E+08   | N/A        | N/A         | N/A        | N/A       | 3.27E+05  |
| N/A   | N/A   | N/A       | 5.64E+06   | N/A        | N/A         | N/A        | N/A       | 4.27E+05  |
| N/A   | N/A   | N/A       | 3.53E+08   | N/A        | N/A         | N/A        | N/A       | 2.59E+05  |
| N/A   | N/A   | N/A       | 4.40E+07   | N/A        | N/A         | N/A        | N/A       | 5.33E+04  |
| N/A   | N/A   | N/A       | 3.50E+08   | N/A        | N/A         | N/A        | N/A       | 2.54E+05  |
| N/A   | N/A   | N/A       | 5.40E+08   | N/A        | N/A         | N/A        | N/A       | 5.00E+05  |
| N/A   | N/A   | N/A       | 3.58E+08   | N/A        | N/A         | N/A        | N/A       | 1.27E+05  |
| N/A   | N/A   | N/A       | 3.78E+08   | N/A        | N/A         | N/A        | N/A       | 6.75E+05  |
| N/A   | N/A   | N/A       | 6.69E+07   | N/A        | N/A         | N/A        | N/A       | 1.73E+05  |
| N/A   | N/A   | N/A       | 9.31E+07   | N/A        | N/A         | N/A        | N/A       | 1.78E+05  |
| N/A   | N/A   | N/A       | 1.29E+08   | N/A        | N/A         | N/A        | N/A       | 1.28E+05  |
| N/A   | N/A   | N/A       | 3.29E+08   | N/A        | N/A         | N/A        | N/A       | 1.77E+05  |
| N/A   | N/A   | N/A       | 4.59E+08   | N/A        | N/A         | N/A        | N/A       | 4.12E+05  |
| N/A   | N/A   | N/A       | 3.41E+08   | N/A        | N/A         | N/A        | N/A       | 2.20E+05  |
| N/A   | N/A   | N/A       | 1.03E+08   | N/A        | N/A         | N/A        | N/A       | 1.05E+05  |

| O-Phospho O-acetylserine | Octadecan | Octanoylca   | Octulose-r | Oleic acid | Oleoylcarn   | Ornithine | Orotic acid |
|--------------------------|-----------|--------------|------------|------------|--------------|-----------|-------------|
| 2.66E+04 N/A             | 2.86E+07  | 1.46E+07 N/A |            | 6.41E+05   | 1.42E+06 N/A |           | N/A         |
| 2.28E+04 N/A             | 1.70E+07  | 4.53E+06 N/A |            | 2.43E+06   | 1.07E+06 N/A |           | N/A         |
| 2.73E+04 N/A             | 9.27E+07  | 3.53E+07 N/A |            | 9.72E+05   | 7.74E+06 N/A |           | N/A         |
| 9.64E+03 N/A             | 8.27E+06  | 5.79E+06 N/A |            | 9.55E+05   | 7.04E+05 N/A |           | N/A         |
| 2.71E+04 N/A             | 1.10E+08  | 5.65E+07 N/A |            | 1.46E+06   | 2.77E+07 N/A |           | N/A         |
| 4.55E+04 N/A             | 2.28E+08  | 3.64E+08 N/A |            | 1.44E+06   | 9.42E+07 N/A |           | N/A         |
| 3.08E+04 N/A             | 1.69E+08  | 3.74E+08 N/A |            | 2.90E+05   | 5.81E+07 N/A |           | N/A         |
| 1.04E+04 N/A             | 4.24E+06  | 5.52E+05 N/A |            | 1.42E+06   | 5.27E+05 N/A |           | N/A         |
| 2.85E+04 N/A             | 8.11E+07  | 6.64E+07 N/A |            | 4.50E+05   | 1.34E+07 N/A |           | N/A         |
| 8.84E+03 N/A             | 8.91E+06  | 6.20E+06 N/A |            | 2.36E+06   | 1.02E+06 N/A |           | N/A         |
| 3.02E+04 N/A             | 2.00E+08  | 1.54E+08 N/A |            | 1.33E+06   | 8.25E+07 N/A |           | N/A         |
| 2.23E+04 N/A             | 8.39E+07  | 6.10E+06 N/A |            | 1.73E+06   | 6.67E+06 N/A |           | N/A         |
| 1.84E+04 N/A             | 7.53E+07  | 1.10E+08 N/A |            | 6.18E+05   | 1.06E+07 N/A |           | N/A         |
| 4.24E+04 N/A             | 4.71E+07  | 6.52E+07 N/A |            | 5.90E+05   | 1.82E+06 N/A |           | N/A         |
| 6.05E+03 N/A             | 2.66E+06  | 1.05E+06 N/A |            | 2.28E+06   | 4.63E+05 N/A |           | N/A         |
| 1.13E+04 N/A             | 2.74E+07  | 3.79E+06 N/A |            | 2.03E+06   | 1.76E+06 N/A |           | N/A         |
| 1.44E+04 N/A             | 6.16E+07  | 1.14E+07 N/A |            | 1.09E+06   | 5.99E+06 N/A |           | N/A         |
| 1.42E+04 N/A             | 8.56E+07  | 8.84E+06 N/A |            | 1.51E+06   | 1.24E+07 N/A |           | N/A         |
| 8.77E+03 N/A             | 1.27E+08  | 9.26E+07 N/A |            | 1.37E+06   | 3.03E+07 N/A |           | N/A         |
| 1.70E+04 N/A             | 8.37E+07  | 2.16E+07 N/A |            | 3.88E+06   | 3.74E+06 N/A |           | N/A         |
| 9.25E+03 N/A             | 1.13E+07  | 3.70E+06 N/A |            | 1.33E+06   | 5.25E+05 N/A |           | N/A         |

|     | Orotidine r | Oxalic acid | Oxaloaceti | Oxidized gl | Oxoglutaric | PA(16:0/16 | PA(16:0/16 | PA(16:1/16 | PA(16:1/16 |
|-----|-------------|-------------|------------|-------------|-------------|------------|------------|------------|------------|
| N/A | 2.13E+05    | 1.32E+06    | 3.63E+06   | N/A         | 5.13E+06    | 2.87E+05   | 1.68E+05   | 1.38E+06   |            |
| N/A | 2.66E+05    | 5.99E+05    | 1.14E+07   | N/A         | 2.87E+06    | 5.41E+05   | 1.44E+05   | 1.30E+06   |            |
| N/A | 2.72E+05    | 5.08E+05    | 8.55E+06   | N/A         | 3.63E+06    | 5.00E+05   | 2.16E+05   | 1.55E+06   |            |
| N/A | 2.49E+05    | 5.67E+05    | 1.42E+06   | N/A         | 3.38E+06    | 3.66E+05   | 1.09E+05   | 1.77E+06   |            |
| N/A | 2.22E+05    | 5.38E+05    | 1.07E+07   | N/A         | 2.24E+06    | 2.39E+05   | 1.11E+05   | 6.73E+05   |            |
| N/A | 2.38E+05    | 6.78E+05    | 8.61E+06   | N/A         | 6.62E+05    | 2.73E+05   | 7.64E+04   | 8.90E+05   |            |
| N/A | 2.30E+05    | 4.70E+05    | 3.94E+06   | N/A         | 2.95E+06    | 5.53E+05   | 7.73E+04   | 6.82E+05   |            |
| N/A | 1.93E+05    | 2.78E+05    | 3.33E+04   | N/A         | 1.71E+06    | 1.29E+05   | 2.15E+04   | 1.76E+05   |            |
| N/A | 2.42E+05    | 4.97E+05    | 2.44E+06   | N/A         | 2.46E+06    | 3.22E+05   | 6.93E+04   | 9.01E+05   |            |
| N/A | 2.42E+05    | 4.42E+05    | 1.98E+05   | N/A         | 4.41E+06    | 3.45E+05   | 1.23E+05   | 7.92E+05   |            |
| N/A | 2.74E+05    | 4.06E+05    | 2.55E+06   | N/A         | 2.01E+06    | 5.55E+05   | 2.41E+05   | 1.97E+06   |            |
| N/A | 3.38E+05    | 4.84E+05    | 3.96E+06   | N/A         | 2.08E+06    | 4.03E+05   | 2.96E+05   | 1.31E+06   |            |
| N/A | 1.74E+05    | 4.39E+05    | 3.21E+06   | N/A         | 1.41E+06    | 2.24E+05   | 4.87E+04   | 8.15E+05   |            |
| N/A | 2.15E+05    | 6.99E+05    | 4.50E+06   | N/A         | 1.59E+06    | 5.03E+05   | 1.43E+05   | 8.99E+05   |            |
| N/A | 2.14E+05    | 4.12E+05    | 2.64E+05   | N/A         | 9.73E+05    | 3.21E+05   | 3.03E+05   | 1.84E+06   |            |
| N/A | 3.37E+05    | 4.29E+05    | 1.28E+06   | N/A         | 4.47E+06    | 6.60E+05   | 3.42E+05   | 2.84E+06   |            |
| N/A | 2.80E+05    | 1.68E+05    | 5.81E+05   | N/A         | 1.75E+06    | 3.14E+05   | 3.20E+05   | 1.86E+06   |            |
| N/A | 2.32E+05    | 3.00E+05    | 1.24E+06   | N/A         | 3.64E+06    | 6.19E+05   | 1.44E+05   | 1.43E+06   |            |
| N/A | 2.61E+05    | 5.89E+05    | 3.26E+06   | N/A         | 1.07E+06    | 4.09E+05   | 4.51E+04   | 9.30E+05   |            |
| N/A | 3.08E+05    | 3.48E+05    | 6.81E+05   | N/A         | 7.88E+05    | 6.26E+05   | 5.22E+05   | 2.21E+06   |            |
| N/A | 2.90E+05    | 4.32E+05    | 1.89E+05   | N/A         | 1.22E+06    | 3.38E+05   | 1.66E+05   | 1.01E+06   |            |

PA(18:0/1€ PA(18:0/1& PA(18:1/1& PC(16:0/1€ PC(16:0/1& PC(16:0/1& PC(16:0/2C PC(16:0/22 PC(18:0/1&

|          |          |          |          |          |          |          |          |          |
|----------|----------|----------|----------|----------|----------|----------|----------|----------|
| 3.52E+05 | 3.40E+06 | 5.40E+07 | 6.31E+06 | 2.52E+07 | 1.12E+07 | 2.52E+06 | 3.71E+05 | 2.66E+07 |
| 2.46E+05 | 3.30E+06 | 4.75E+07 | 3.63E+06 | 1.68E+07 | 9.05E+06 | 2.95E+06 | 4.07E+05 | 1.80E+07 |
| 3.70E+05 | 4.04E+06 | 6.29E+07 | 4.46E+06 | 2.14E+07 | 1.05E+07 | 1.59E+06 | 4.68E+05 | 3.55E+07 |
| 3.91E+05 | 4.24E+06 | 5.52E+07 | 2.96E+06 | 2.14E+07 | 1.02E+07 | 2.13E+06 | 2.56E+05 | 2.23E+07 |
| 1.83E+05 | 2.19E+06 | 4.26E+07 | 2.54E+06 | 1.86E+07 | 9.10E+06 | 1.89E+06 | 3.47E+05 | 1.15E+07 |
| 1.64E+05 | 1.25E+06 | 2.90E+07 | 8.11E+05 | 1.14E+07 | 1.55E+07 | 1.88E+06 | 2.08E+05 | 7.33E+06 |
| 2.09E+05 | 1.54E+06 | 4.43E+07 | 3.24E+06 | 1.71E+07 | 1.56E+07 | 4.45E+06 | 5.26E+05 | 6.27E+06 |
| 4.07E+04 | 6.17E+05 | 1.11E+07 | 2.19E+06 | 6.97E+06 | 3.64E+06 | 4.79E+05 | 9.63E+04 | 3.09E+06 |
| 1.44E+05 | 2.22E+06 | 5.87E+07 | 2.49E+06 | 1.85E+07 | 1.75E+07 | 3.12E+06 | 7.36E+05 | 1.05E+07 |
| 2.92E+05 | 1.74E+06 | 4.77E+07 | 3.36E+06 | 1.58E+07 | 8.18E+06 | 2.24E+06 | 3.31E+05 | 1.22E+07 |
| 4.26E+05 | 3.33E+06 | 5.47E+07 | 2.06E+06 | 2.31E+07 | 1.08E+07 | 2.29E+06 | 3.27E+05 | 7.34E+06 |
| 3.02E+05 | 2.13E+06 | 4.45E+07 | 2.69E+06 | 1.80E+07 | 1.32E+07 | 1.97E+06 | 7.32E+05 | 1.09E+07 |
| 1.14E+05 | 1.36E+06 | 4.12E+07 | 1.78E+06 | 1.59E+07 | 1.19E+07 | 2.68E+06 | 3.83E+05 | 9.12E+06 |
| 2.37E+05 | 1.29E+06 | 2.88E+07 | 1.88E+06 | 1.33E+07 | 1.26E+07 | 3.57E+06 | 7.16E+05 | 5.01E+06 |
| 3.42E+05 | 1.75E+06 | 3.31E+07 | 1.39E+06 | 1.41E+07 | 1.16E+07 | 2.71E+06 | 7.21E+05 | 8.39E+06 |
| 4.17E+05 | 3.61E+06 | 7.48E+07 | 3.53E+06 | 1.95E+07 | 1.17E+07 | 2.02E+06 | 6.66E+05 | 7.42E+06 |
| 4.80E+05 | 2.54E+06 | 4.92E+07 | 2.25E+06 | 1.93E+07 | 1.26E+07 | 2.40E+06 | 2.34E+05 | 1.50E+07 |
| 3.71E+05 | 3.07E+06 | 4.57E+07 | 4.09E+06 | 1.95E+07 | 1.40E+07 | 2.70E+06 | 3.07E+05 | 1.96E+07 |
| 1.88E+05 | 2.29E+06 | 5.42E+07 | 1.17E+06 | 1.74E+07 | 1.10E+07 | 1.84E+06 | 4.66E+05 | 8.29E+06 |
| 3.78E+05 | 1.21E+06 | 3.06E+07 | 1.24E+06 | 1.51E+07 | 1.49E+07 | 4.61E+06 | 5.40E+05 | 9.16E+06 |
| 2.22E+05 | 1.34E+06 | 4.10E+07 | 1.14E+06 | 1.61E+07 | 1.70E+07 | 5.68E+06 | 5.60E+05 | 4.28E+06 |

|     | PC(18:1/22 | PC(20:4/P- | PC(20:5/P- | PC(22:6/P- | PC(24:0/P- | PC(30:0) | PC(32:1) | PC(32:2) | PC(36:0) |
|-----|------------|------------|------------|------------|------------|----------|----------|----------|----------|
| N/A | 7.49E+06   | 2.24E+05   | 1.89E+05   | N/A        |            | 1.40E+06 | 1.06E+06 | 2.01E+06 | 1.63E+06 |
| N/A | 7.58E+06   | 2.52E+05   | 1.74E+05   | N/A        |            | 1.01E+06 | 7.30E+05 | 2.32E+06 | 1.56E+06 |
| N/A | 9.20E+06   | 9.71E+05   | 1.90E+05   | N/A        |            | 1.29E+06 | 1.08E+06 | 2.98E+06 | 3.34E+06 |
| N/A | 1.21E+07   | 2.92E+05   | 1.35E+05   | N/A        |            | 1.46E+06 | 1.24E+06 | 2.95E+06 | 1.63E+06 |
| N/A | 1.16E+07   | 9.21E+05   | 1.92E+05   | N/A        |            | 6.57E+05 | 5.86E+05 | 1.50E+06 | 2.16E+06 |
| N/A | 1.03E+07   | 3.17E+05   | 7.80E+04   | N/A        |            | 3.53E+05 | 5.33E+05 | 2.94E+06 | 1.16E+06 |
| N/A | 2.93E+07   | 1.90E+06   | 2.56E+05   | N/A        |            | 9.73E+05 | 1.56E+06 | 4.74E+06 | 3.50E+06 |
| N/A | 2.12E+06   | 4.85E+05   | 1.51E+05   | N/A        |            | 1.22E+06 | 6.57E+05 | 2.07E+06 | 1.40E+06 |
| N/A | 1.92E+07   | 2.16E+06   | 3.61E+05   | N/A        |            | 1.01E+06 | 1.06E+06 | 3.46E+06 | 4.38E+06 |
| N/A | 3.15E+07   | 2.34E+06   | 3.16E+05   | N/A        |            | 1.50E+06 | 1.28E+06 | 2.60E+06 | 5.85E+06 |
| N/A | 2.77E+07   | 1.29E+06   | 2.47E+05   | N/A        |            | 6.96E+05 | 1.24E+06 | 3.35E+06 | 4.06E+06 |
| N/A | 1.10E+07   | 2.16E+06   | 5.29E+05   | N/A        |            | 9.10E+05 | 9.43E+05 | 2.71E+06 | 5.24E+06 |
| N/A | 9.10E+06   | 1.02E+06   | 3.05E+05   | N/A        |            | 4.36E+05 | 6.30E+05 | 2.32E+06 | 3.24E+06 |
| N/A | 2.60E+07   | 2.00E+06   | 1.48E+05   | N/A        |            | 1.01E+06 | 1.05E+06 | 3.70E+06 | 3.72E+06 |
| N/A | 1.69E+07   | 1.64E+06   | 4.24E+05   | N/A        |            | 5.51E+05 | 6.58E+05 | 2.51E+06 | 5.06E+06 |
| N/A | 1.83E+07   | 3.06E+06   | 3.97E+05   | N/A        |            | 1.58E+06 | 2.07E+06 | 3.26E+06 | 6.52E+06 |
| N/A | 1.68E+07   | 3.55E+05   | 1.08E+05   | N/A        |            | 1.11E+06 | 1.98E+06 | 3.26E+06 | 1.45E+06 |
| N/A | 2.74E+07   | 1.37E+06   | 4.40E+05   | N/A        |            | 1.53E+06 | 1.44E+06 | 3.70E+06 | 3.85E+06 |
| N/A | 1.04E+07   | 2.61E+06   | 3.38E+05   | N/A        |            | 3.71E+05 | 4.99E+05 | 2.28E+06 | 5.04E+06 |
| N/A | 1.33E+07   | 3.48E+05   | 1.47E+05   | N/A        |            | 6.07E+05 | 9.14E+05 | 4.61E+06 | 1.33E+06 |
| N/A | 3.73E+07   | 1.41E+06   | 1.63E+05   | N/A        |            | 4.22E+05 | 5.90E+05 | 2.96E+06 | 3.15E+06 |



| PC(36:1) | PC(38:5) | PC(40:6) | PE (18:0/18) | PE(20:4/18) | PE(30:1) | PE(32:1) | PE(32:2) | PE(34:1) |
|----------|----------|----------|--------------|-------------|----------|----------|----------|----------|
| 1.92E+07 | 8.75E+05 | 7.84E+05 | 5.23E+05     | 5.68E+06    | N/A      | 4.24E+04 | 7.27E+04 | 1.03E+06 |
| 1.41E+07 | 1.04E+06 | 7.88E+05 | 5.97E+05     | 7.07E+06    | N/A      | 6.42E+04 | 7.70E+04 | 1.72E+06 |
| 2.43E+07 | 1.24E+06 | 1.42E+06 | 1.78E+06     | 9.68E+06    | N/A      | 5.94E+04 | 1.07E+05 | 1.41E+06 |
| 1.59E+07 | 5.39E+05 | 4.03E+05 | 7.74E+05     | 8.46E+06    | N/A      | 3.82E+04 | 4.89E+04 | 9.05E+05 |
| 8.31E+06 | 8.30E+05 | 5.55E+05 | 6.80E+05     | 2.05E+06    | N/A      | 2.56E+04 | 1.75E+04 | 1.06E+06 |
| 4.34E+06 | 2.61E+05 | 9.78E+04 | 5.87E+05     | 4.84E+06    | N/A      | 2.53E+04 | 2.51E+04 | 5.28E+05 |
| 4.06E+06 | 8.30E+05 | 5.47E+05 | 1.15E+06     | 4.14E+06    | N/A      | 1.83E+04 | 1.29E+04 | 6.10E+05 |
| 2.65E+06 | 1.97E+05 | 1.51E+05 | 1.76E+05     | 8.22E+05    | N/A      | 7.44E+05 | 2.74E+05 | 1.00E+06 |
| 7.26E+06 | 1.06E+06 | 7.94E+05 | 1.77E+06     | 4.26E+06    | N/A      | 2.67E+04 | 1.47E+04 | 7.63E+05 |
| 9.11E+06 | 8.51E+05 | 5.78E+05 | 2.47E+06     | 4.65E+06    | N/A      | 4.97E+04 | 9.57E+04 | 2.25E+06 |
| 5.20E+06 | 7.12E+05 | 4.52E+05 | 1.27E+06     | 7.99E+06    | N/A      | 2.97E+04 | 5.81E+04 | 8.41E+05 |
| 7.64E+06 | 1.54E+06 | 1.09E+06 | 1.61E+06     | 3.28E+06    | N/A      | 4.19E+04 | 2.83E+04 | 9.01E+05 |
| 5.83E+06 | 7.44E+05 | 3.49E+05 | 6.50E+05     | 4.51E+06    | N/A      | 1.73E+04 | 8.69E+03 | 6.23E+05 |
| 3.50E+06 | 1.11E+06 | 6.30E+05 | 1.38E+06     | 5.11E+06    | N/A      | 5.30E+04 | 1.85E+04 | 1.05E+06 |
| 5.73E+06 | 1.29E+06 | 8.61E+05 | 1.14E+06     | 4.28E+06    | N/A      | 3.85E+04 | 7.43E+04 | 5.55E+05 |
| 7.16E+06 | 1.06E+06 | 7.97E+05 | 3.19E+06     | 6.92E+06    | N/A      | 7.36E+04 | 1.14E+05 | 2.18E+06 |
| 9.99E+06 | 3.37E+05 | 2.59E+05 | 3.57E+05     | 5.19E+06    | N/A      | 1.54E+04 | 8.78E+04 | 4.80E+05 |
| 1.22E+07 | 8.76E+05 | 6.41E+05 | 1.09E+06     | 4.87E+06    | N/A      | 4.21E+04 | 5.47E+04 | 9.79E+05 |
| 5.64E+06 | 9.79E+05 | 6.46E+05 | 1.52E+06     | 4.25E+06    | N/A      | 1.40E+04 | 1.12E+04 | 6.67E+05 |
| 5.55E+06 | 8.50E+05 | 2.95E+05 | 8.11E+05     | 1.06E+07    | N/A      | 2.99E+04 | 1.24E+05 | 7.88E+05 |
| 3.33E+06 | 9.07E+05 | 3.61E+05 | 1.02E+06     | 4.44E+06    | N/A      | 4.53E+04 | 4.77E+04 | 8.13E+05 |

| PE(34:2) | PE(36:1) | PE(36:2) | PE(36:3) | PE(36:4) | PG(16:0/16:1) | PG(32:1) | PG(32:2) | PG(34:1) |
|----------|----------|----------|----------|----------|---------------|----------|----------|----------|
| 4.58E+05 | 1.89E+06 | 7.28E+06 | 1.02E+07 | 2.34E+06 | N/A           | 8.39E+04 | 7.48E+04 | 9.09E+06 |
| 7.02E+05 | 4.38E+06 | 9.82E+06 | 9.47E+06 | 2.76E+06 | N/A           | 1.31E+05 | 1.17E+05 | 9.08E+06 |
| 5.90E+05 | 1.31E+06 | 8.00E+06 | 1.43E+07 | 3.80E+06 | N/A           | 1.21E+05 | 5.15E+04 | 1.26E+07 |
| 4.26E+05 | 1.53E+06 | 7.60E+06 | 1.46E+07 | 2.55E+06 | N/A           | 5.62E+04 | 4.12E+04 | 1.14E+07 |
| 2.03E+05 | 2.22E+06 | 6.01E+06 | 3.97E+06 | 1.95E+06 | N/A           | 4.27E+04 | 2.66E+04 | 4.54E+06 |
| 2.89E+05 | 1.95E+06 | 6.75E+06 | 8.62E+06 | 2.56E+06 | N/A           | 9.27E+04 | 3.54E+04 | 7.39E+06 |
| 1.56E+05 | 1.28E+06 | 1.76E+06 | 3.60E+06 | 5.87E+06 | N/A           | 1.95E+04 | 1.43E+04 | 6.58E+06 |
| 4.49E+05 | 1.28E+06 | 2.86E+06 | 3.38E+06 | 8.38E+05 | N/A           | 1.06E+05 | 1.91E+05 | 6.16E+06 |
| 2.31E+05 | 1.15E+06 | 6.56E+06 | 6.32E+06 | 1.87E+06 | N/A           | 4.06E+04 | 1.52E+04 | 6.50E+06 |
| 5.73E+05 | 3.56E+06 | 7.81E+06 | 6.41E+06 | 3.94E+06 | N/A           | 1.40E+05 | 7.12E+04 | 8.55E+06 |
| 4.11E+05 | 1.49E+06 | 7.42E+06 | 1.33E+07 | 6.35E+06 | N/A           | 1.99E+05 | 5.84E+04 | 1.44E+07 |
| 1.75E+05 | 1.87E+06 | 3.81E+06 | 4.24E+06 | 1.91E+06 | N/A           | 5.97E+04 | 4.21E+04 | 5.63E+06 |
| 1.24E+05 | 1.68E+06 | 6.22E+06 | 8.82E+06 | 2.23E+06 | N/A           | 5.13E+04 | 2.61E+04 | 4.87E+06 |
| 2.99E+05 | 1.88E+06 | 3.51E+06 | 5.77E+06 | 5.38E+06 | N/A           | 1.31E+05 | 5.27E+04 | 9.11E+06 |
| 3.11E+05 | 2.09E+06 | 5.43E+06 | 4.84E+06 | 2.59E+06 | N/A           | 6.42E+04 | 4.42E+04 | 3.78E+06 |
| 5.21E+05 | 7.02E+06 | 1.14E+07 | 7.80E+06 | 6.09E+06 | N/A           | 2.50E+05 | 2.44E+05 | 1.91E+07 |
| 5.49E+05 | 1.99E+06 | 4.78E+06 | 8.51E+06 | 1.37E+06 | N/A           | 1.74E+05 | 1.22E+05 | 1.23E+07 |
| 5.04E+05 | 3.31E+06 | 5.29E+06 | 7.21E+06 | 3.55E+06 | N/A           | 2.20E+05 | 7.57E+04 | 2.08E+07 |
| 2.02E+05 | 2.02E+06 | 6.50E+06 | 7.88E+06 | 2.10E+06 | N/A           | 4.32E+04 | 1.09E+04 | 3.30E+06 |
| 7.59E+05 | 3.39E+06 | 7.76E+06 | 1.27E+07 | 3.54E+06 | N/A           | 2.26E+05 | 1.93E+05 | 1.08E+07 |
| 3.77E+05 | 2.12E+06 | 4.57E+06 | 4.23E+06 | 5.59E+06 | N/A           | 7.46E+04 | 4.00E+04 | 5.74E+06 |

| PG(34:2) | PG(36:1) | PG(36:2) | PG(36:3) | PG(38:4) | PG(44:12) | PGF2alpha | PI(16:0/16:PI(30:1) |
|----------|----------|----------|----------|----------|-----------|-----------|---------------------|
| 1.02E+06 | 3.02E+05 | 9.04E+05 | 2.38E+05 | 7.59E+04 | N/A       | 2.98E+05  | 3.44E+06 N/A        |
| 1.65E+06 | 2.20E+05 | 4.46E+05 | 2.64E+05 | 9.06E+04 | N/A       | 7.66E+05  | 9.57E+05 N/A        |
| 5.95E+05 | 1.04E+05 | 2.95E+05 | 1.40E+05 | 4.05E+04 | N/A       | 2.74E+05  | 4.63E+06 N/A        |
| 5.04E+05 | 1.86E+05 | 5.43E+05 | 1.33E+05 | 3.66E+04 | N/A       | 3.11E+05  | 3.00E+06 N/A        |
| 1.72E+05 | 5.02E+04 | 1.84E+05 | 4.00E+04 | 1.55E+04 | N/A       | 2.37E+05  | 1.13E+06 N/A        |
| 4.03E+05 | 6.27E+04 | 1.10E+05 | 9.46E+04 | 5.28E+03 | N/A       | 2.40E+05  | 6.75E+05 N/A        |
| 2.17E+05 | 1.57E+05 | 2.66E+05 | 4.47E+04 | 5.08E+04 | N/A       | 2.53E+05  | 4.72E+05 N/A        |
| 4.98E+05 | 1.84E+05 | 5.59E+05 | 1.26E+06 | 1.50E+05 | N/A       | 3.14E+05  | 3.23E+05 N/A        |
| 2.54E+05 | 1.70E+05 | 6.36E+05 | 1.14E+05 | 8.08E+04 | N/A       | 2.72E+05  | 7.50E+05 N/A        |
| 3.71E+05 | 1.23E+05 | 2.11E+05 | 1.62E+05 | 3.28E+04 | N/A       | 5.78E+05  | 1.36E+06 N/A        |
| 5.79E+05 | 4.99E+04 | 2.53E+05 | 1.06E+05 | 1.67E+04 | N/A       | 3.03E+05  | 2.35E+06 N/A        |
| 4.05E+05 | 6.36E+04 | 2.44E+05 | 5.55E+04 | 2.48E+04 | N/A       | 3.20E+05  | 5.16E+05 N/A        |
| 4.18E+05 | 7.55E+04 | 3.91E+05 | 2.00E+05 | 2.96E+04 | N/A       | 3.07E+05  | 7.53E+05 N/A        |
| 4.86E+05 | 8.73E+04 | 2.44E+05 | 1.36E+05 | 1.26E+05 | N/A       | 2.37E+05  | 3.70E+06 N/A        |
| 4.98E+05 | 3.56E+04 | 1.26E+05 | 6.49E+04 | 7.27E+04 | N/A       | 2.25E+05  | 1.66E+05 N/A        |
| 2.29E+06 | 1.79E+05 | 3.48E+05 | 1.28E+05 | 1.48E+05 | N/A       | 2.24E+05  | 3.09E+06 N/A        |
| 1.83E+06 | 2.65E+05 | 7.85E+05 | 1.59E+05 | 4.39E+04 | N/A       | 2.25E+05  | 8.42E+05 N/A        |
| 9.48E+05 | 2.21E+05 | 4.17E+05 | 1.32E+05 | 1.19E+05 | N/A       | 3.04E+05  | 1.96E+06 N/A        |
| 2.02E+05 | 5.78E+04 | 1.40E+05 | 4.63E+04 | 1.60E+04 | N/A       | 2.77E+05  | 2.42E+05 N/A        |
| 1.35E+06 | 1.28E+05 | 3.20E+05 | 6.29E+04 | 2.34E+04 | N/A       | 3.38E+05  | 5.23E+05 N/A        |
| 3.43E+05 | 4.42E+04 | 7.09E+04 | 4.31E+04 | 4.61E+04 | N/A       | 3.73E+05  | 5.70E+05 N/A        |

| PI(32:2) | PI(34:0) | PI(34:1) | PI(34:2) | PI(36:0) | PI(36:1) | PI(36:2) | PI(36:4) | PI(38:3) |
|----------|----------|----------|----------|----------|----------|----------|----------|----------|
| N/A      | 2.65E+06 | 2.63E+07 | 5.24E+06 | 2.37E+06 | 2.28E+07 | 2.47E+07 | 4.27E+07 | 1.35E+08 |
| N/A      | 1.05E+06 | 1.19E+07 | 2.48E+06 | 1.10E+06 | 1.14E+07 | 1.15E+07 | 2.09E+07 | 9.06E+07 |
| N/A      | 2.71E+06 | 2.81E+07 | 5.67E+06 | 1.49E+06 | 1.19E+07 | 1.97E+07 | 2.94E+07 | 1.20E+08 |
| N/A      | 2.26E+06 | 1.82E+07 | 3.72E+06 | 2.22E+06 | 2.31E+07 | 2.37E+07 | 2.13E+07 | 1.27E+08 |
| N/A      | 1.12E+06 | 1.13E+07 | 1.87E+06 | 1.41E+06 | 1.41E+07 | 1.15E+07 | 9.14E+06 | 8.26E+07 |
| N/A      | 9.58E+05 | 7.58E+06 | 1.50E+06 | 2.26E+06 | 2.37E+07 | 1.22E+07 | 4.34E+06 | 8.08E+07 |
| N/A      | 4.77E+05 | 3.96E+06 | 7.61E+05 | 1.99E+06 | 1.69E+07 | 5.69E+06 | 1.10E+07 | 1.35E+08 |
| N/A      | 2.79E+05 | 3.29E+06 | 3.06E+05 | 2.16E+06 | 2.13E+07 | 5.52E+06 | 6.59E+06 | 5.92E+07 |
| N/A      | 1.30E+06 | 1.32E+07 | 2.03E+06 | 2.74E+06 | 2.62E+07 | 2.03E+07 | 7.89E+06 | 1.30E+08 |
| N/A      | 1.81E+06 | 1.69E+07 | 6.16E+06 | 3.59E+06 | 3.55E+07 | 2.30E+07 | 2.22E+07 | 1.53E+08 |
| N/A      | 2.46E+06 | 1.87E+07 | 8.12E+06 | 2.60E+06 | 2.62E+07 | 3.33E+07 | 1.52E+07 | 1.15E+08 |
| N/A      | 1.13E+06 | 7.83E+06 | 1.55E+06 | 1.53E+06 | 1.40E+07 | 7.81E+06 | 5.83E+06 | 7.93E+07 |
| N/A      | 1.67E+06 | 1.30E+07 | 3.44E+06 | 3.28E+06 | 3.87E+07 | 3.84E+07 | 6.56E+06 | 7.97E+07 |
| N/A      | 5.55E+06 | 2.90E+07 | 3.73E+06 | 3.61E+06 | 3.46E+07 | 2.00E+07 | 2.22E+07 | 1.06E+08 |
| N/A      | 4.27E+05 | 5.17E+06 | 8.30E+06 | 8.67E+05 | 8.39E+06 | 2.39E+07 | 1.21E+07 | 5.87E+07 |
| N/A      | 1.42E+07 | 3.34E+07 | 1.26E+07 | 1.18E+07 | 8.05E+07 | 5.13E+07 | 1.76E+07 | 1.49E+08 |
| N/A      | 3.00E+06 | 7.97E+06 | 3.70E+06 | 9.22E+06 | 7.53E+07 | 2.48E+07 | 1.19E+07 | 1.44E+08 |
| N/A      | 2.05E+06 | 1.98E+07 | 7.69E+06 | 2.50E+06 | 2.79E+07 | 2.85E+07 | 2.01E+07 | 1.43E+08 |
| N/A      | 6.17E+05 | 7.64E+06 | 1.35E+06 | 2.33E+06 | 2.39E+07 | 1.59E+07 | 4.51E+06 | 8.85E+07 |
| N/A      | 9.78E+05 | 5.76E+06 | 2.66E+06 | 1.55E+06 | 1.66E+07 | 8.16E+06 | 7.26E+06 | 6.17E+07 |
| N/A      | 1.35E+06 | 9.44E+06 | 2.22E+06 | 2.90E+06 | 2.67E+07 | 1.51E+07 | 1.44E+07 | 9.84E+07 |

| PI(38:4) | PI(38:5) | PI(40:5) | PS(18:0/18 | PS(18:0/20 | PS(32:0) | PS(32:2) | PS(34:1) | PS(34:2) |
|----------|----------|----------|------------|------------|----------|----------|----------|----------|
| 2.41E+08 | 6.19E+07 | 1.21E+07 | 2.10E+08   | 1.93E+08   | 1.06E+06 | N/A      | 4.28E+05 | 3.35E+05 |
| 1.71E+08 | 4.60E+07 | 9.07E+06 | 1.03E+08   | 6.57E+07   | 3.36E+05 | N/A      | 1.12E+05 | 8.20E+04 |
| 2.23E+08 | 5.66E+07 | 2.71E+07 | 1.26E+08   | 1.38E+08   | 1.66E+05 | N/A      | 1.33E+05 | 1.01E+05 |
| 2.24E+08 | 4.92E+07 | 1.28E+07 | 2.29E+08   | 1.54E+08   | 1.09E+05 | N/A      | 1.89E+05 | 1.39E+05 |
| 1.51E+08 | 1.61E+07 | 8.87E+06 | 1.08E+08   | 2.41E+07   | 1.21E+05 | N/A      | 1.01E+05 | 6.03E+04 |
| 1.39E+08 | 1.62E+07 | 8.95E+06 | 1.02E+08   | 2.22E+07   | 4.57E+04 | N/A      | 5.88E+04 | 8.92E+04 |
| 2.66E+08 | 4.03E+07 | 7.73E+07 | 8.63E+07   | 4.70E+07   | 9.45E+04 | N/A      | 1.21E+05 | 1.23E+05 |
| 1.12E+08 | 1.49E+07 | 1.31E+07 | 1.48E+08   | 1.59E+07   | 1.05E+05 | N/A      | 1.58E+05 | 1.31E+05 |
| 2.27E+08 | 3.91E+07 | 5.69E+07 | 9.68E+07   | 5.54E+07   | 9.67E+04 | N/A      | 1.11E+05 | 8.81E+04 |
| 2.75E+08 | 3.98E+07 | 5.73E+07 | 6.33E+07   | 5.62E+07   | 1.53E+05 | N/A      | 1.99E+05 | 2.26E+05 |
| 2.21E+08 | 5.70E+07 | 2.25E+07 | 7.57E+07   | 6.80E+07   | 1.20E+05 | N/A      | 1.45E+05 | 2.17E+05 |
| 1.42E+08 | 1.72E+07 | 2.02E+07 | 5.67E+07   | 2.31E+07   | 4.37E+04 | N/A      | 5.22E+04 | 3.37E+04 |
| 1.53E+08 | 3.96E+07 | 2.10E+07 | 1.90E+08   | 7.01E+07   | 2.70E+05 | N/A      | 2.42E+05 | 2.65E+05 |
| 1.89E+08 | 3.59E+07 | 4.38E+07 | 1.58E+08   | 1.25E+08   | 3.02E+05 | N/A      | 2.73E+05 | 2.52E+05 |
| 1.22E+08 | 3.75E+07 | 1.51E+07 | 8.28E+07   | 3.74E+07   | 6.16E+04 | N/A      | 2.17E+05 | 2.41E+05 |
| 2.55E+08 | 4.60E+07 | 7.73E+07 | 3.21E+08   | 2.22E+08   | 4.66E+05 | N/A      | 4.85E+05 | 2.60E+05 |
| 2.31E+08 | 6.53E+07 | 1.60E+07 | 1.76E+08   | 7.51E+07   | 2.48E+05 | N/A      | 4.42E+05 | 2.78E+05 |
| 2.66E+08 | 5.79E+07 | 5.70E+07 | 1.66E+08   | 8.49E+07   | 2.61E+05 | N/A      | 3.10E+05 | 2.74E+05 |
| 1.60E+08 | 2.45E+07 | 2.64E+07 | 7.69E+07   | 2.51E+07   | 5.45E+04 | N/A      | 6.35E+04 | 5.98E+04 |
| 1.29E+08 | 3.18E+07 | 7.65E+06 | 5.37E+07   | 1.53E+07   | 1.70E+04 | N/A      | 3.25E+04 | 3.19E+04 |
| 1.83E+08 | 3.13E+07 | 2.35E+07 | 7.29E+07   | 3.69E+07   | 6.71E+04 | N/A      | 1.12E+05 | 1.44E+05 |

| PS(36:0) | PS(36:2) | Palmitoyl | Pantotheni | Phenylacet | Phenyllacti | Phosphoer | Phosphoryl | Pimelylcarr |
|----------|----------|-----------|------------|------------|-------------|-----------|------------|-------------|
| 4.61E+06 | 3.69E+08 | 4.44E+05  | 1.62E+07   | N/A        | N/A         | 1.73E+06  | 6.59E+07   | 4.78E+06    |
| 1.69E+06 | 1.51E+08 | 3.15E+05  | 1.84E+07   | N/A        | N/A         | 9.69E+06  | 9.15E+07   | 1.48E+07    |
| 2.42E+06 | 2.79E+08 | 3.13E+05  | 1.72E+07   | N/A        | N/A         | 6.01E+05  | 3.42E+07   | 2.03E+06    |
| 3.55E+06 | 4.49E+08 | 1.06E+04  | 1.23E+07   | N/A        | N/A         | 8.16E+05  | 1.60E+07   | 3.68E+06    |
| 1.62E+06 | 1.87E+08 | 2.23E+05  | 1.63E+07   | N/A        | N/A         | 1.37E+05  | 3.55E+07   | 1.35E+07    |
| 1.34E+06 | 3.09E+08 | 2.02E+05  | 2.81E+07   | N/A        | N/A         | 1.93E+05  | 1.85E+07   | 8.48E+07    |
| 1.87E+06 | 1.44E+08 | 2.57E+05  | 1.68E+07   | N/A        | N/A         | 1.14E+06  | 6.10E+07   | 1.42E+08    |
| 2.20E+06 | 2.45E+08 | 1.29E+06  | 3.95E+05   | N/A        | N/A         | 3.04E+04  | 9.80E+07   | 2.54E+05    |
| 1.65E+06 | 2.19E+08 | 1.70E+04  | 1.80E+07   | N/A        | N/A         | 6.35E+05  | 1.90E+07   | 1.28E+07    |
| 1.47E+06 | 9.40E+07 | 8.00E+03  | 2.59E+06   | N/A        | N/A         | 3.72E+04  | 9.37E+06   | 8.52E+06    |
| 1.11E+06 | 1.96E+08 | 5.49E+06  | 2.86E+07   | N/A        | N/A         | 6.13E+05  | 9.01E+06   | 3.90E+07    |
| 9.35E+05 | 1.05E+08 | 2.78E+05  | 1.93E+07   | N/A        | N/A         | 1.54E+05  | 1.76E+07   | 1.28E+07    |
| 2.55E+06 | 5.26E+08 | 4.27E+04  | 5.62E+07   | N/A        | N/A         | 1.80E+05  | 7.80E+06   | 3.73E+07    |
| 3.91E+06 | 4.95E+08 | 1.13E+04  | 3.39E+07   | N/A        | N/A         | 2.70E+05  | 1.82E+07   | 2.84E+07    |
| 1.21E+06 | 1.84E+08 | 3.06E+05  | 2.89E+06   | N/A        | N/A         | 3.99E+04  | 6.83E+06   | 5.35E+05    |
| 6.87E+06 | 4.15E+08 | 3.15E+03  | 2.76E+06   | N/A        | N/A         | 7.73E+05  | 4.55E+06   | 6.05E+06    |
| 3.78E+06 | 4.57E+08 | 5.10E+04  | 4.86E+06   | N/A        | N/A         | 5.67E+05  | 6.46E+06   | 4.13E+07    |
| 3.33E+06 | 2.62E+08 | 6.92E+04  | 4.96E+06   | N/A        | N/A         | 6.26E+05  | 1.30E+07   | 3.30E+07    |
| 1.09E+06 | 2.10E+08 | 1.75E+05  | 2.75E+07   | N/A        | N/A         | 3.56E+05  | 2.34E+07   | 1.58E+07    |
| 8.72E+05 | 1.26E+08 | 1.16E+05  | 4.44E+07   | N/A        | N/A         | 4.02E+05  | 3.02E+07   | 5.04E+07    |
| 1.08E+06 | 1.80E+08 | 7.06E+04  | 3.82E+06   | N/A        | N/A         | 1.38E+05  | 6.53E+06   | 3.86E+06    |

Pipecolic a Plasmaloge Plasmaloge Plasmaloge Plasmaloge Propionic a Propionylc Prostaglanı Prostaglanı

|     |          |          |          |          |     |          |     |     |
|-----|----------|----------|----------|----------|-----|----------|-----|-----|
| N/A | 2.98E+07 | 1.64E+06 | 4.14E+07 | 1.48E+06 | N/A | 4.26E+08 | N/A | N/A |
| N/A | 4.26E+07 | 8.65E+05 | 4.17E+07 | 9.73E+05 | N/A | 4.84E+08 | N/A | N/A |
| N/A | 3.13E+07 | 6.69E+06 | 5.02E+07 | 3.35E+06 | N/A | 5.65E+08 | N/A | N/A |
| N/A | 2.84E+07 | 1.36E+06 | 4.95E+07 | 9.89E+05 | N/A | 5.89E+08 | N/A | N/A |
| N/A | 3.13E+07 | 3.19E+06 | 4.24E+07 | 2.40E+06 | N/A | 5.29E+08 | N/A | N/A |
| N/A | 2.63E+07 | 3.60E+06 | 4.56E+07 | 1.89E+06 | N/A | 6.75E+08 | N/A | N/A |
| N/A | 4.43E+07 | 6.04E+06 | 5.27E+07 | 4.50E+06 | N/A | 5.67E+08 | N/A | N/A |
| N/A | 7.39E+06 | 6.24E+05 | 9.75E+06 | 1.22E+06 | N/A | 3.81E+07 | N/A | N/A |
| N/A | 2.38E+07 | 5.29E+06 | 3.39E+07 | 3.26E+06 | N/A | 5.94E+08 | N/A | N/A |
| N/A | 4.80E+07 | 9.66E+06 | 7.02E+07 | 5.25E+06 | N/A | 3.14E+08 | N/A | N/A |
| N/A | 2.51E+07 | 3.02E+06 | 4.65E+07 | 1.60E+06 | N/A | 6.05E+08 | N/A | N/A |
| N/A | 3.49E+07 | 5.76E+06 | 5.06E+07 | 4.98E+06 | N/A | 6.04E+08 | N/A | N/A |
| N/A | 2.27E+07 | 3.19E+05 | 2.72E+07 | 8.01E+05 | N/A | 9.32E+08 | N/A | N/A |
| N/A | 3.75E+07 | 6.46E+06 | 6.01E+07 | 3.78E+06 | N/A | 8.79E+08 | N/A | N/A |
| N/A | 3.44E+07 | 2.81E+06 | 3.71E+07 | 3.16E+06 | N/A | 5.07E+08 | N/A | N/A |
| N/A | 3.96E+07 | 4.03E+06 | 4.08E+07 | 4.56E+06 | N/A | 3.90E+08 | N/A | N/A |
| N/A | 3.64E+07 | 4.32E+05 | 4.20E+07 | 6.17E+05 | N/A | 5.61E+08 | N/A | N/A |
| N/A | 5.63E+07 | 2.07E+06 | 5.95E+07 | 2.69E+06 | N/A | 6.10E+08 | N/A | N/A |
| N/A | 2.35E+07 | 3.98E+06 | 3.36E+07 | 2.99E+06 | N/A | 6.18E+08 | N/A | N/A |
| N/A | 4.18E+07 | 9.86E+05 | 4.84E+07 | 1.19E+06 | N/A | 8.00E+08 | N/A | N/A |
| N/A | 3.86E+07 | 1.98E+06 | 4.71E+07 | 2.14E+06 | N/A | 4.57E+08 | N/A | N/A |

| Prostaglan | Pseudouric | Purine   | Pyridoxal | Pyridoxal 5 | Pyridoxami | Pyridoxine | Pyroglutar | Pyrophosp |
|------------|------------|----------|-----------|-------------|------------|------------|------------|-----------|
| N/A        | N/A        | 2.62E+06 | N/A       | N/A         | 3.49E+05   | N/A        | 7.67E+05   | 4.24E+06  |
| N/A        | N/A        | 5.93E+06 | N/A       | N/A         | 7.13E+05   | N/A        | 2.18E+06   | 2.46E+07  |
| N/A        | N/A        | 1.83E+06 | N/A       | N/A         | 1.27E+06   | N/A        | 1.49E+06   | 2.69E+07  |
| N/A        | N/A        | 1.97E+06 | N/A       | N/A         | 3.27E+05   | N/A        | 5.56E+05   | 7.12E+06  |
| N/A        | N/A        | 3.12E+06 | N/A       | N/A         | 4.58E+05   | N/A        | 2.67E+06   | 6.71E+07  |
| N/A        | N/A        | 2.26E+06 | N/A       | N/A         | 1.89E+05   | N/A        | 1.22E+06   | 2.70E+07  |
| N/A        | N/A        | 6.47E+06 | N/A       | N/A         | 4.41E+05   | N/A        | 5.40E+05   | 3.44E+07  |
| N/A        | N/A        | 5.07E+05 | N/A       | N/A         | 4.83E+05   | N/A        | 4.74E+04   | 1.18E+06  |
| N/A        | N/A        | 2.73E+06 | N/A       | N/A         | 4.68E+05   | N/A        | 8.66E+05   | 2.91E+07  |
| N/A        | N/A        | 1.57E+06 | N/A       | N/A         | 1.81E+06   | N/A        | 2.42E+05   | 2.75E+06  |
| N/A        | N/A        | 1.91E+06 | N/A       | N/A         | 5.40E+05   | N/A        | 3.85E+05   | 1.00E+07  |
| N/A        | N/A        | 2.91E+06 | N/A       | N/A         | 4.27E+05   | N/A        | 6.38E+05   | 3.59E+07  |
| N/A        | N/A        | 1.98E+06 | N/A       | N/A         | 1.14E+06   | N/A        | 7.24E+05   | 2.39E+07  |
| N/A        | N/A        | 5.68E+06 | N/A       | N/A         | 6.79E+05   | N/A        | 1.15E+06   | 4.41E+07  |
| N/A        | N/A        | 1.03E+06 | N/A       | N/A         | 7.42E+05   | N/A        | 5.70E+04   | 5.89E+05  |
| N/A        | N/A        | 9.36E+05 | N/A       | N/A         | 2.64E+05   | N/A        | 1.58E+05   | 1.96E+06  |
| N/A        | N/A        | 1.21E+06 | N/A       | N/A         | 2.61E+05   | N/A        | 1.45E+05   | 2.19E+06  |
| N/A        | N/A        | 1.96E+06 | N/A       | N/A         | 2.68E+05   | N/A        | 2.13E+05   | 1.13E+07  |
| N/A        | N/A        | 4.25E+06 | N/A       | N/A         | 7.98E+05   | N/A        | 6.55E+05   | 4.76E+07  |
| N/A        | N/A        | 1.17E+07 | N/A       | N/A         | 7.73E+06   | N/A        | 4.54E+05   | 1.53E+07  |
| N/A        | N/A        | 2.54E+06 | N/A       | N/A         | 9.87E+05   | N/A        | 2.85E+05   | 1.53E+06  |



| Pyruvic aci | Quinolinic | Resolvin D: | Retinal | Retinol | Riboflavin | Ribose 5-pl | S-Adenosyl | S-Adenosyl |
|-------------|------------|-------------|---------|---------|------------|-------------|------------|------------|
| 2.09E+07    | 4.30E+05   | N/A         | N/A     | N/A     | 1.93E+06   | 1.31E+06    | 6.75E+06   | N/A        |
| 2.83E+07    | 2.81E+05   | N/A         | N/A     | N/A     | 4.80E+06   | 9.99E+05    | 3.47E+06   | N/A        |
| 3.40E+07    | 4.19E+05   | N/A         | N/A     | N/A     | 1.45E+06   | 9.79E+05    | 6.99E+06   | N/A        |
| 2.17E+07    | 2.75E+05   | N/A         | N/A     | N/A     | 2.49E+06   | 8.91E+05    | 5.25E+06   | N/A        |
| 2.97E+07    | 1.62E+05   | N/A         | N/A     | N/A     | 9.07E+05   | 5.70E+05    | 5.89E+06   | N/A        |
| 2.30E+07    | 2.12E+05   | N/A         | N/A     | N/A     | 5.82E+05   | 2.17E+05    | 5.16E+06   | N/A        |
| 2.82E+07    | 1.78E+05   | N/A         | N/A     | N/A     | 6.07E+05   | 4.49E+05    | 3.49E+06   | N/A        |
| 2.93E+07    | 2.33E+05   | N/A         | N/A     | N/A     | 7.21E+05   | 1.12E+06    | 4.97E+05   | N/A        |
| 2.29E+07    | 1.64E+05   | N/A         | N/A     | N/A     | 1.07E+06   | 9.12E+05    | 4.02E+06   | N/A        |
| 2.33E+07    | 2.36E+05   | N/A         | N/A     | N/A     | 9.40E+06   | 8.58E+05    | 2.36E+06   | N/A        |
| 2.84E+07    | 2.32E+05   | N/A         | N/A     | N/A     | 1.38E+06   | 1.12E+06    | 7.43E+06   | N/A        |
| 3.43E+07    | 2.32E+05   | N/A         | N/A     | N/A     | 1.87E+06   | 7.56E+05    | 4.22E+06   | N/A        |
| 2.01E+07    | 2.07E+05   | N/A         | N/A     | N/A     | 2.20E+06   | 6.67E+05    | 7.39E+06   | N/A        |
| 6.30E+07    | 1.47E+05   | N/A         | N/A     | N/A     | 7.87E+06   | 6.15E+05    | 4.05E+06   | N/A        |
| 2.89E+07    | 1.85E+05   | N/A         | N/A     | N/A     | 1.91E+06   | 1.38E+06    | 1.79E+06   | N/A        |
| 3.18E+07    | 2.33E+05   | N/A         | N/A     | N/A     | 9.66E+05   | 7.44E+05    | 2.49E+06   | N/A        |
| 4.40E+07    | 2.86E+05   | N/A         | N/A     | N/A     | 1.09E+06   | 1.18E+06    | 5.65E+06   | N/A        |
| 2.85E+07    | 2.20E+05   | N/A         | N/A     | N/A     | 1.36E+06   | 8.50E+05    | 6.29E+06   | N/A        |
| 3.03E+07    | 1.31E+05   | N/A         | N/A     | N/A     | 1.54E+06   | 7.02E+05    | 4.56E+06   | N/A        |
| 3.56E+07    | 3.38E+05   | N/A         | N/A     | N/A     | 9.28E+06   | 1.07E+06    | 7.35E+06   | N/A        |
| 2.92E+07    | 2.68E+05   | N/A         | N/A     | N/A     | 4.17E+06   | 1.17E+06    | 1.78E+06   | N/A        |

Saccharopi Salicyluric ȃ Sarcosine Sebacic aci Sedoheptu Selenomet Serotonin Shikimateȃ Shikimic ac

|              |              |              |              |     |
|--------------|--------------|--------------|--------------|-----|
| 3.42E+06 N/A | 2.08E+08 N/A | 3.13E+06 N/A | 1.04E+06 N/A | N/A |
| 5.02E+06 N/A | 2.81E+08 N/A | 1.33E+07 N/A | 1.60E+06 N/A | N/A |
| 2.53E+07 N/A | 2.79E+08 N/A | 5.45E+06 N/A | 1.39E+06 N/A | N/A |
| 9.01E+06 N/A | 2.20E+08 N/A | 2.54E+06 N/A | 8.82E+05 N/A | N/A |
| 1.11E+07 N/A | 3.40E+08 N/A | 2.68E+06 N/A | 1.47E+06 N/A | N/A |
| 2.13E+07 N/A | 3.59E+08 N/A | 2.73E+06 N/A | 1.19E+06 N/A | N/A |
| 2.06E+06 N/A | 3.31E+08 N/A | 7.22E+05 N/A | 1.15E+06 N/A | N/A |
| 1.56E+05 N/A | 1.28E+07 N/A | 8.91E+04 N/A | 1.14E+06 N/A | N/A |
| 5.42E+05 N/A | 2.87E+08 N/A | 3.18E+06 N/A | 1.25E+06 N/A | N/A |
| 2.15E+05 N/A | 1.04E+08 N/A | 1.66E+06 N/A | 8.87E+05 N/A | N/A |
| 1.63E+06 N/A | 2.81E+08 N/A | 2.65E+06 N/A | 8.50E+05 N/A | N/A |
| 1.49E+06 N/A | 3.17E+08 N/A | 6.16E+06 N/A | 1.71E+06 N/A | N/A |
| 1.52E+06 N/A | 3.17E+08 N/A | 2.37E+06 N/A | 1.31E+06 N/A | N/A |
| 8.06E+05 N/A | 3.20E+08 N/A | 2.09E+06 N/A | 9.33E+05 N/A | N/A |
| 3.28E+05 N/A | 4.81E+07 N/A | 4.54E+05 N/A | 1.10E+06 N/A | N/A |
| 3.14E+05 N/A | 1.57E+08 N/A | 1.26E+06 N/A | 9.62E+05 N/A | N/A |
| 2.01E+06 N/A | 1.69E+08 N/A | 1.81E+06 N/A | 9.56E+05 N/A | N/A |
| 1.72E+06 N/A | 2.59E+08 N/A | 2.15E+06 N/A | 9.75E+05 N/A | N/A |
| 8.21E+05 N/A | 3.11E+08 N/A | 7.29E+06 N/A | 1.38E+06 N/A | N/A |
| 2.46E+07 N/A | 2.83E+08 N/A | 7.33E+06 N/A | 8.47E+05 N/A | N/A |
| 2.93E+05 N/A | 1.10E+08 N/A | 3.70E+06 N/A | 1.14E+06 N/A | N/A |

| Spermidine | Spermine | Sphinganine | Sphingosin | Sphingosin | Suberic Aci | Suberylcari | Succinic aci | THC 18:1/1 |
|------------|----------|-------------|------------|------------|-------------|-------------|--------------|------------|
| N/A        | N/A      | 7.88E+05    | 2.31E+06   | N/A        | N/A         | N/A         | 2.47E+06     | 1.74E+05   |
| N/A        | N/A      | 4.83E+05    | 2.71E+06   | N/A        | N/A         | N/A         | 6.21E+06     | 7.64E+04   |
| N/A        | N/A      | 1.80E+05    | 5.00E+05   | N/A        | N/A         | N/A         | 1.37E+07     | 1.12E+05   |
| N/A        | N/A      | 1.71E+05    | 6.28E+05   | N/A        | N/A         | N/A         | 5.13E+06     | 1.46E+05   |
| N/A        | N/A      | 1.04E+05    | 3.46E+05   | N/A        | N/A         | N/A         | 3.73E+06     | 5.24E+04   |
| N/A        | N/A      | 6.55E+04    | 3.99E+05   | N/A        | N/A         | N/A         | 4.03E+06     | 1.94E+04   |
| N/A        | N/A      | 1.22E+05    | 1.03E+06   | N/A        | N/A         | N/A         | 1.63E+07     | 1.38E+05   |
| N/A        | N/A      | 5.41E+06    | 2.50E+06   | N/A        | N/A         | N/A         | 4.77E+05     | 1.75E+05   |
| N/A        | N/A      | 1.55E+05    | 3.46E+05   | N/A        | N/A         | N/A         | 7.89E+06     | 2.27E+04   |
| N/A        | N/A      | 6.29E+05    | 1.05E+07   | N/A        | N/A         | N/A         | 7.35E+05     | 1.26E+05   |
| N/A        | N/A      | 1.43E+05    | 5.54E+05   | N/A        | N/A         | N/A         | 8.74E+06     | 4.85E+04   |
| N/A        | N/A      | 1.18E+05    | 4.56E+05   | N/A        | N/A         | N/A         | 5.28E+06     | 1.12E+05   |
| N/A        | N/A      | 1.06E+05    | 1.31E+05   | N/A        | N/A         | N/A         | 4.90E+06     | 1.99E+04   |
| N/A        | N/A      | 2.55E+05    | 1.45E+05   | N/A        | N/A         | N/A         | 9.09E+06     | 9.95E+04   |
| N/A        | N/A      | 3.51E+05    | 6.18E+05   | N/A        | N/A         | N/A         | 2.42E+06     | 4.36E+04   |
| N/A        | N/A      | 1.43E+05    | 3.59E+05   | N/A        | N/A         | N/A         | 1.34E+06     | 3.38E+05   |
| N/A        | N/A      | 1.93E+05    | 6.10E+05   | N/A        | N/A         | N/A         | 9.41E+05     | 1.23E+05   |
| N/A        | N/A      | 1.29E+05    | 7.04E+05   | N/A        | N/A         | N/A         | 2.36E+06     | 8.73E+04   |
| N/A        | N/A      | 1.62E+05    | 5.82E+05   | N/A        | N/A         | N/A         | 5.01E+06     | 2.26E+04   |
| N/A        | N/A      | 5.55E+05    | 9.97E+05   | N/A        | N/A         | N/A         | 1.26E+07     | 2.91E+04   |
| N/A        | N/A      | 2.92E+05    | 6.68E+05   | N/A        | N/A         | N/A         | 1.74E+06     | 3.24E+04   |

| THC 18:1/1 | THC 18:1/2 | THC 18:1/2 | THC 18:1/2 | THC 18:1/2 | Taurine  | Taurocholi | Taurodeox | Testostero |
|------------|------------|------------|------------|------------|----------|------------|-----------|------------|
| 7.16E+04   | N/A        | N/A        | 9.05E+05   | N/A        | 3.30E+08 | N/A        | N/A       | N/A        |
| 1.76E+04   | N/A        | N/A        | 2.68E+05   | N/A        | 3.85E+08 | N/A        | N/A       | N/A        |
| 5.27E+04   | N/A        | N/A        | 6.87E+05   | N/A        | 3.90E+08 | N/A        | N/A       | N/A        |
| 7.09E+04   | N/A        | N/A        | 4.67E+05   | N/A        | 3.26E+08 | N/A        | N/A       | N/A        |
| 9.78E+03   | N/A        | N/A        | 6.56E+04   | N/A        | 3.39E+08 | N/A        | N/A       | N/A        |
| 2.97E+03   | N/A        | N/A        | 4.40E+04   | N/A        | 1.79E+08 | N/A        | N/A       | N/A        |
| 1.53E+04   | N/A        | N/A        | 1.87E+05   | N/A        | 3.47E+08 | N/A        | N/A       | N/A        |
| 1.53E+04   | N/A        | N/A        | 6.46E+04   | N/A        | 1.43E+07 | N/A        | N/A       | N/A        |
| 1.74E+04   | N/A        | N/A        | 1.15E+05   | N/A        | 3.26E+08 | N/A        | N/A       | N/A        |
| 2.42E+04   | N/A        | N/A        | 9.43E+04   | N/A        | 2.48E+08 | N/A        | N/A       | N/A        |
| 1.56E+04   | N/A        | N/A        | 1.53E+05   | N/A        | 3.60E+08 | N/A        | N/A       | N/A        |
| 1.29E+04   | N/A        | N/A        | 9.15E+04   | N/A        | 3.97E+08 | N/A        | N/A       | N/A        |
| 1.26E+04   | N/A        | N/A        | 7.16E+04   | N/A        | 3.72E+08 | N/A        | N/A       | N/A        |
| 1.63E+04   | N/A        | N/A        | 1.50E+05   | N/A        | 3.47E+08 | N/A        | N/A       | N/A        |
| 6.93E+03   | N/A        | N/A        | 4.75E+04   | N/A        | 8.26E+07 | N/A        | N/A       | N/A        |
| 3.19E+04   | N/A        | N/A        | 3.38E+05   | N/A        | 1.09E+08 | N/A        | N/A       | N/A        |
| 1.81E+04   | N/A        | N/A        | 2.76E+05   | N/A        | 1.35E+08 | N/A        | N/A       | N/A        |
| 2.20E+04   | N/A        | N/A        | 3.63E+05   | N/A        | 3.12E+08 | N/A        | N/A       | N/A        |
| 1.26E+04   | N/A        | N/A        | 4.10E+04   | N/A        | 4.20E+08 | N/A        | N/A       | N/A        |
| 1.55E+04   | N/A        | N/A        | 3.81E+04   | N/A        | 3.18E+08 | N/A        | N/A       | N/A        |
| 1.63E+04   | N/A        | N/A        | 3.56E+04   | N/A        | 1.30E+08 | N/A        | N/A       | N/A        |

| Tetrahydro | Tetranor-P | Tetranor-P | Thiamine | Thiamine n | Thiamine p | Thrombox | Thymidine | Thymidine |
|------------|------------|------------|----------|------------|------------|----------|-----------|-----------|
| N/A        | N/A        | 1.53E+07   | 1.53E+07 | 8.63E+04   | N/A        | N/A      | N/A       | N/A       |
| N/A        | N/A        | 9.07E+06   | 4.60E+07 | 9.85E+04   | N/A        | N/A      | N/A       | N/A       |
| N/A        | N/A        | 7.94E+06   | 1.81E+07 | 1.45E+05   | N/A        | N/A      | N/A       | N/A       |
| N/A        | N/A        | 1.77E+07   | 1.74E+07 | 1.02E+05   | N/A        | N/A      | N/A       | N/A       |
| N/A        | N/A        | 9.21E+06   | 1.12E+07 | 3.89E+05   | N/A        | N/A      | N/A       | N/A       |
| N/A        | N/A        | 6.04E+06   | 1.75E+05 | 3.90E+04   | N/A        | N/A      | N/A       | N/A       |
| N/A        | N/A        | 5.35E+06   | 1.24E+06 | 1.19E+05   | N/A        | N/A      | N/A       | N/A       |
| N/A        | N/A        | 3.00E+07   | 2.35E+05 | 1.59E+03   | N/A        | N/A      | N/A       | N/A       |
| N/A        | N/A        | 1.39E+07   | 5.16E+06 | 7.32E+04   | N/A        | N/A      | N/A       | N/A       |
| N/A        | N/A        | 2.31E+07   | 4.91E+06 | 1.25E+04   | N/A        | N/A      | N/A       | N/A       |
| N/A        | N/A        | 1.16E+07   | 3.71E+06 | 8.65E+04   | N/A        | N/A      | N/A       | N/A       |
| N/A        | N/A        | 1.03E+07   | 1.27E+07 | 4.70E+05   | N/A        | N/A      | N/A       | N/A       |
| N/A        | N/A        | 1.57E+07   | 1.40E+07 | 1.16E+05   | N/A        | N/A      | N/A       | N/A       |
| N/A        | N/A        | 1.27E+07   | 2.19E+07 | 1.58E+05   | N/A        | N/A      | N/A       | N/A       |
| N/A        | N/A        | 1.68E+07   | 3.27E+06 | 4.59E+04   | N/A        | N/A      | N/A       | N/A       |
| N/A        | N/A        | 1.35E+07   | 1.05E+07 | 1.05E+05   | N/A        | N/A      | N/A       | N/A       |
| N/A        | N/A        | 2.07E+07   | 3.18E+06 | 5.00E+04   | N/A        | N/A      | N/A       | N/A       |
| N/A        | N/A        | 1.57E+07   | 7.41E+06 | 2.26E+05   | N/A        | N/A      | N/A       | N/A       |
| N/A        | N/A        | 8.61E+06   | 6.47E+06 | 2.20E+05   | N/A        | N/A      | N/A       | N/A       |
| N/A        | N/A        | 1.13E+07   | 1.21E+07 | 1.15E+05   | N/A        | N/A      | N/A       | N/A       |
| N/A        | N/A        | 1.79E+07   | 4.79E+06 | 3.92E+04   | N/A        | N/A      | N/A       | N/A       |

| Thymine | Tiglylcarnit | Tiglylglycin | Trimethyla | Tyramine | Uracil | Urea | Ureidoproç | Ureidosucc |
|---------|--------------|--------------|------------|----------|--------|------|------------|------------|
| N/A     | 4.94E+06     | N/A          | 5.44E+05   | N/A      | N/A    | N/A  | 3.80E+06   | 2.30E+05   |
| N/A     | 1.02E+07     | N/A          | 8.79E+06   | N/A      | N/A    | N/A  | 4.97E+06   | 3.66E+05   |
| N/A     | 1.07E+07     | N/A          | 1.89E+06   | N/A      | N/A    | N/A  | 4.93E+06   | 3.45E+05   |
| N/A     | 9.27E+06     | N/A          | 2.49E+06   | N/A      | N/A    | N/A  | 4.10E+06   | 2.51E+05   |
| N/A     | 3.64E+07     | N/A          | 5.38E+06   | N/A      | N/A    | N/A  | 6.01E+06   | 4.82E+05   |
| N/A     | 1.09E+07     | N/A          | 4.61E+06   | N/A      | N/A    | N/A  | 5.76E+06   | 5.97E+05   |
| N/A     | 1.10E+07     | N/A          | 2.45E+06   | N/A      | N/A    | N/A  | 5.88E+06   | 4.32E+03   |
| N/A     | 6.36E+05     | N/A          | 1.22E+05   | N/A      | N/A    | N/A  | 4.81E+05   | 6.41E+04   |
| N/A     | 5.13E+06     | N/A          | 3.85E+06   | N/A      | N/A    | N/A  | 5.10E+06   | 2.90E+05   |
| N/A     | 1.79E+06     | N/A          | 5.54E+05   | N/A      | N/A    | N/A  | 1.44E+06   | 6.03E+04   |
| N/A     | 8.55E+06     | N/A          | 1.95E+06   | N/A      | N/A    | N/A  | 5.09E+06   | 1.47E+05   |
| N/A     | 9.44E+06     | N/A          | 7.26E+06   | N/A      | N/A    | N/A  | 5.75E+06   | 5.23E+05   |
| N/A     | 2.91E+07     | N/A          | 1.68E+06   | N/A      | N/A    | N/A  | 5.35E+06   | 2.93E+05   |
| N/A     | 1.83E+08     | N/A          | 3.15E+06   | N/A      | N/A    | N/A  | 5.64E+06   | 4.60E+05   |
| N/A     | 1.27E+06     | N/A          | 6.92E+05   | N/A      | N/A    | N/A  | 8.08E+05   | 9.16E+04   |
| N/A     | 4.03E+06     | N/A          | 1.35E+06   | N/A      | N/A    | N/A  | 2.86E+06   | 7.82E+04   |
| N/A     | 2.66E+06     | N/A          | 1.09E+06   | N/A      | N/A    | N/A  | 3.02E+06   | 9.99E+04   |
| N/A     | 9.08E+06     | N/A          | 1.60E+06   | N/A      | N/A    | N/A  | 4.43E+06   | 9.96E+04   |
| N/A     | 7.90E+06     | N/A          | 4.52E+06   | N/A      | N/A    | N/A  | 5.32E+06   | 4.90E+05   |
| N/A     | 4.70E+07     | N/A          | 2.71E+06   | N/A      | N/A    | N/A  | 4.62E+06   | 1.80E+05   |
| N/A     | 1.84E+06     | N/A          | 8.16E+05   | N/A      | N/A    | N/A  | 1.82E+06   | 1.72E+05   |

| Uric acid | Uridine  | Uridine 5-d | Uridine 5-n | Uridine dip | Uridine dip | Uridine dip | Uridine triç | Vitamin D3 |
|-----------|----------|-------------|-------------|-------------|-------------|-------------|--------------|------------|
| 1.72E+06  | 7.70E+06 | 3.66E+05    | 1.34E+07    | N/A         | 6.53E+04    | 7.24E+05    | N/A          | N/A        |
| 1.26E+06  | 4.20E+06 | 1.57E+05    | 3.94E+05    | N/A         | 7.34E+03    | 2.34E+05    | N/A          | N/A        |
| 4.75E+05  | 7.66E+06 | 6.87E+05    | 1.49E+07    | N/A         | 1.30E+05    | 5.29E+05    | N/A          | N/A        |
| 4.70E+05  | 3.19E+06 | 1.40E+05    | 1.89E+06    | N/A         | 1.94E+04    | 2.18E+05    | N/A          | N/A        |
| 8.84E+05  | 1.69E+07 | 6.62E+05    | 1.25E+07    | N/A         | 2.85E+05    | 4.77E+05    | N/A          | N/A        |
| 5.67E+05  | 2.20E+07 | 1.10E+06    | 5.82E+06    | N/A         | 8.47E+04    | 1.05E+06    | N/A          | N/A        |
| 1.08E+06  | 4.31E+06 | 3.26E+06    | 1.11E+07    | N/A         | 1.82E+05    | 1.30E+06    | N/A          | N/A        |
| 9.60E+04  | 2.22E+05 | 4.04E+04    | 1.98E+05    | N/A         | 3.66E+03    | 5.51E+03    | N/A          | N/A        |
| 3.53E+05  | 1.06E+07 | 4.38E+05    | 4.42E+06    | N/A         | 4.17E+04    | 2.79E+05    | N/A          | N/A        |
| 4.39E+04  | 2.92E+06 | 3.35E+04    | 1.67E+05    | N/A         | 2.46E+02    | 1.77E+03    | N/A          | N/A        |
| 5.13E+05  | 1.05E+07 | 5.70E+05    | 4.85E+06    | N/A         | 5.24E+04    | 3.15E+05    | N/A          | N/A        |
| 1.98E+05  | 1.88E+07 | 3.44E+05    | 8.05E+06    | N/A         | 2.39E+04    | 2.04E+05    | N/A          | N/A        |
| 4.37E+05  | 9.78E+06 | 2.22E+05    | 2.52E+06    | N/A         | 6.83E+03    | 1.79E+05    | N/A          | N/A        |
| 1.36E+06  | 1.07E+07 | 3.30E+05    | 5.73E+06    | N/A         | 2.54E+04    | 1.68E+05    | N/A          | N/A        |
| 1.66E+05  | 2.32E+06 | 2.03E+04    | 2.25E+05    | N/A         | 7.19E+03    | 1.47E+05    | N/A          | N/A        |
| 5.69E+04  | 1.49E+06 | 4.78E+05    | 1.91E+06    | N/A         | 3.27E+04    | 6.56E+04    | N/A          | N/A        |
| 4.85E+05  | 3.74E+06 | 1.92E+05    | 1.65E+06    | N/A         | 5.55E+03    | 1.07E+05    | N/A          | N/A        |
| 5.27E+05  | 7.82E+06 | 3.15E+05    | 4.89E+06    | N/A         | 2.80E+04    | 2.19E+05    | N/A          | N/A        |
| 2.77E+05  | 1.82E+07 | 2.38E+05    | 3.87E+06    | N/A         | 2.21E+04    | 3.30E+05    | N/A          | N/A        |
| 1.79E+06  | 1.05E+07 | 6.14E+04    | 3.85E+05    | N/A         | 1.99E+03    | 1.20E+05    | N/A          | N/A        |
| 1.35E+05  | 1.86E+06 | 3.19E+04    | 1.35E+05    | N/A         | 4.28E+03    | 4.78E+04    | N/A          | N/A        |

| Vitamin K2 | Xanthine | Xanthosine | Xanthureni | Zymostero | beta-Alanir | cis-aconitic | dTDP-D-glu | p-Aminobe |
|------------|----------|------------|------------|-----------|-------------|--------------|------------|-----------|
| 1.59E+05   | 1.42E+08 | 2.05E+07   | N/A        | N/A       | 1.23E+05    | 3.32E+05     | N/A        | N/A       |
| 3.21E+05   | 1.85E+08 | 2.59E+07   | N/A        | N/A       | 3.07E+05    | 1.09E+06     | N/A        | N/A       |
| 7.39E+05   | 1.31E+08 | 1.13E+07   | N/A        | N/A       | 1.93E+05    | 8.70E+05     | N/A        | N/A       |
| 2.38E+05   | 1.21E+08 | 1.09E+07   | N/A        | N/A       | 2.79E+05    | 6.07E+05     | N/A        | N/A       |
| 7.01E+05   | 1.40E+08 | 1.17E+07   | N/A        | N/A       | 3.11E+05    | 7.75E+05     | N/A        | N/A       |
| 1.73E+06   | 7.89E+07 | 4.17E+06   | N/A        | N/A       | 3.02E+05    | 1.39E+06     | N/A        | N/A       |
| 3.13E+06   | 5.79E+07 | 1.31E+06   | N/A        | N/A       | 1.72E+06    | 9.04E+05     | N/A        | N/A       |
| 1.08E+06   | 5.12E+06 | 2.96E+05   | N/A        | N/A       | 1.04E+05    | 1.51E+05     | N/A        | N/A       |
| 4.12E+05   | 1.36E+08 | 6.13E+06   | N/A        | N/A       | 3.37E+05    | 9.34E+05     | N/A        | N/A       |
| 3.14E+06   | 6.48E+07 | 1.82E+06   | N/A        | N/A       | 3.09E+05    | 1.04E+05     | N/A        | N/A       |
| 3.32E+06   | 1.09E+08 | 8.50E+06   | N/A        | N/A       | 5.15E+05    | 5.28E+05     | N/A        | N/A       |
| 3.04E+05   | 9.77E+07 | 3.63E+06   | N/A        | N/A       | 5.04E+05    | 1.73E+06     | N/A        | N/A       |
| 1.82E+06   | 1.56E+08 | 1.64E+07   | N/A        | N/A       | 4.81E+05    | 7.02E+05     | N/A        | N/A       |
| 9.71E+05   | 1.95E+08 | 4.04E+07   | N/A        | N/A       | 7.76E+05    | 1.61E+06     | N/A        | N/A       |
| 2.79E+05   | 6.88E+07 | 2.28E+06   | N/A        | N/A       | 3.18E+05    | 3.07E+04     | N/A        | N/A       |
| 2.69E+05   | 3.60E+07 | 5.55E+05   | N/A        | N/A       | 1.66E+05    | 8.32E+05     | N/A        | N/A       |
| 2.63E+05   | 9.04E+07 | 3.26E+06   | N/A        | N/A       | 2.02E+05    | 6.49E+05     | N/A        | N/A       |
| 2.32E+05   | 1.06E+08 | 6.03E+06   | N/A        | N/A       | 2.94E+05    | 1.39E+06     | N/A        | N/A       |
| 2.42E+05   | 1.33E+08 | 1.07E+07   | N/A        | N/A       | 5.45E+05    | 7.38E+05     | N/A        | N/A       |
| 3.21E+05   | 1.77E+08 | 3.38E+07   | N/A        | N/A       | 1.23E+06    | 8.96E+05     | N/A        | N/A       |
| 1.26E+05   | 6.29E+07 | 2.52E+06   | N/A        | N/A       | 2.43E+05    | 2.64E+05     | N/A        | N/A       |



| p-Aminohip | p-Cresol | p-Hydroxyγ NADP |          | Arachidic a | Behenic ac | CE(14:0) | CE(16:0) | CE(16:1) |
|------------|----------|-----------------|----------|-------------|------------|----------|----------|----------|
| N/A        | N/A      | 1.80E+05        | 3.57E+04 | 4.02E+05    | 2.04E+06   | 1.04E+04 | 3.44E+04 | 3.95E+04 |
| N/A        | N/A      | 2.36E+05        | 1.08E+04 | 2.62E+05    | 1.54E+06   | 7.26E+03 | 3.25E+04 | 3.64E+04 |
| N/A        | N/A      | 2.93E+05        | 1.26E+05 | 3.72E+05    | 1.92E+06   | 1.01E+04 | 3.15E+04 | 2.27E+04 |
| N/A        | N/A      | 1.90E+05        | 5.73E+04 | 2.66E+05    | 1.51E+06   | 1.40E+04 | 2.64E+04 | 2.53E+04 |
| N/A        | N/A      | 2.53E+05        | 1.04E+04 | 2.73E+05    | 1.65E+06   | 1.32E+04 | 3.33E+04 | 3.42E+04 |
| N/A        | N/A      | 2.68E+05        | 4.09E+04 | 4.50E+05    | 2.13E+06   | 5.31E+03 | 3.36E+04 | 3.42E+04 |
| N/A        | N/A      | 4.23E+05        | 4.01E+05 | 2.97E+05    | 1.62E+06   | 1.04E+04 | 2.92E+04 | 2.28E+04 |
| N/A        | N/A      | 2.32E+05        | 6.96E+03 | 5.10E+05    | 1.87E+06   | 8.35E+03 | 2.56E+04 | 2.63E+04 |
| N/A        | N/A      | 2.57E+05        | 1.07E+05 | 3.90E+05    | 1.90E+06   | 7.63E+03 | 3.18E+04 | 2.13E+04 |
| N/A        | N/A      | 2.02E+05        | 1.63E+04 | 1.40E+06    | 2.14E+06   | 1.40E+04 | 2.94E+04 | 2.52E+04 |
| N/A        | N/A      | 3.24E+05        | 1.87E+05 | 3.44E+05    | 1.85E+06   | 1.04E+04 | 3.17E+04 | 1.81E+04 |
| N/A        | N/A      | 3.04E+05        | 8.01E+03 | 3.72E+05    | 1.96E+06   | 5.81E+03 | 3.76E+04 | 4.14E+04 |
| N/A        | N/A      | 3.05E+05        | 2.06E+05 | 3.16E+05    | 1.61E+06   | 7.02E+03 | 2.89E+04 | 2.73E+04 |
| N/A        | N/A      | 2.82E+05        | 1.71E+05 | 3.90E+05    | 1.81E+06   | 1.10E+04 | 3.14E+04 | 2.16E+04 |
| N/A        | N/A      | 1.77E+05        | 6.07E+03 | 3.73E+05    | 1.94E+06   | 1.19E+04 | 2.77E+04 | 2.25E+04 |
| N/A        | N/A      | 2.38E+05        | 1.07E+05 | 4.03E+05    | 1.84E+06   | 1.11E+04 | 2.98E+04 | 2.10E+04 |
| N/A        | N/A      | 2.46E+05        | 3.71E+04 | 3.86E+05    | 1.93E+06   | 1.25E+04 | 3.02E+04 | 2.86E+04 |
| N/A        | N/A      | 3.19E+05        | 4.65E+04 | 3.22E+05    | 1.80E+06   | 8.99E+03 | 2.36E+04 | 2.52E+04 |
| N/A        | N/A      | 3.11E+05        | 1.03E+04 | 2.76E+05    | 1.60E+06   | 1.54E+04 | 5.46E+04 | 4.44E+04 |
| N/A        | N/A      | 3.82E+05        | 4.85E+03 | 3.71E+05    | 1.92E+06   | 9.83E+03 | 2.81E+04 | 2.66E+04 |
| N/A        | N/A      | 2.10E+05        | 4.74E+03 | 6.75E+05    | 2.52E+06   | 1.24E+04 | 2.73E+04 | 2.90E+04 |

| CE(18:0) | CE(18:1) | CE(18:2) | CE(18:3) | CE(20:4) | CE(20:5) | Myristic ac | Myristoleic | Palmitic ac |
|----------|----------|----------|----------|----------|----------|-------------|-------------|-------------|
| 1.22E+04 | 7.26E+04 | 4.32E+05 | 2.34E+04 | 1.68E+05 | 2.25E+04 | 8.55E+04    | N/A         | 2.15E+06    |
| 7.47E+04 | 5.06E+04 | 2.47E+05 | 9.90E+03 | 1.51E+05 | 1.03E+04 | 2.12E+05    | N/A         | 2.30E+06    |
| 4.43E+04 | 2.36E+04 | 3.54E+04 | 2.67E+03 | 2.07E+04 | 1.36E+04 | 1.12E+05    | N/A         | 1.71E+06    |
| 2.62E+04 | 2.29E+04 | 4.64E+04 | 1.75E+03 | 1.97E+04 | 1.58E+04 | 9.83E+04    | N/A         | 2.16E+06    |
| 4.51E+04 | 3.77E+04 | 8.72E+04 | 3.64E+03 | 4.22E+04 | 1.40E+04 | 1.28E+05    | N/A         | 2.46E+06    |
| 4.77E+04 | 4.03E+04 | 2.28E+05 | 1.21E+04 | 7.33E+04 | 1.09E+04 | 1.30E+05    | N/A         | 1.48E+06    |
| 4.75E+04 | 2.87E+04 | 1.20E+05 | 7.47E+03 | 4.74E+04 | 2.68E+04 | 6.77E+04    | N/A         | 9.84E+05    |
| 1.90E+04 | 3.01E+04 | 7.31E+04 | 4.91E+03 | 2.94E+04 | 1.36E+04 | 1.09E+05    | N/A         | 6.85E+06    |
| 3.71E+04 | 2.29E+04 | 7.19E+04 | 7.29E+03 | 3.64E+04 | 1.50E+04 | 8.88E+04    | N/A         | 1.78E+06    |
| 1.63E+04 | 1.98E+04 | 1.78E+04 | 9.38E+02 | 4.80E+03 | 1.56E+04 | 3.18E+05    | N/A         | 4.40E+06    |
| 1.61E+04 | 3.12E+04 | 3.86E+04 | 1.36E+03 | 1.52E+04 | 7.98E+03 | 1.30E+05    | N/A         | 1.53E+06    |
| 2.36E+04 | 6.90E+04 | 4.30E+05 | 1.59E+04 | 2.31E+05 | 8.58E+04 | 1.49E+05    | N/A         | 1.71E+06    |
| 1.91E+04 | 2.55E+04 | 3.02E+04 | 3.39E+03 | 1.04E+04 | 1.07E+04 | 6.27E+04    | N/A         | 1.76E+06    |
| 8.81E+03 | 2.59E+04 | 3.67E+04 | 6.48E+03 | 2.81E+04 | 1.23E+04 | 1.76E+05    | N/A         | 2.48E+06    |
| 4.72E+04 | 2.59E+04 | 3.34E+04 | 1.94E+03 | 1.00E+04 | 1.14E+04 | 2.06E+05    | N/A         | 2.13E+06    |
| 9.49E+03 | 2.89E+04 | 2.59E+04 | 1.32E+03 | 6.57E+03 | 9.46E+03 | 2.03E+05    | N/A         | 1.64E+06    |
| 1.38E+04 | 2.37E+04 | 2.31E+04 | 1.80E+03 | 1.06E+04 | 1.11E+04 | 9.56E+04    | N/A         | 1.42E+06    |
| 2.51E+04 | 2.08E+04 | 4.61E+04 | 2.06E+03 | 8.06E+03 | 1.01E+04 | 1.28E+05    | N/A         | 1.34E+06    |
| 5.42E+04 | 1.35E+05 | 9.42E+05 | 5.36E+04 | 2.98E+05 | 4.12E+04 | 1.01E+05    | N/A         | 1.55E+06    |
| 3.37E+04 | 3.85E+04 | 8.18E+04 | 3.49E+03 | 2.62E+04 | 7.37E+03 | 3.44E+05    | N/A         | 2.81E+06    |
| 4.70E+04 | 4.19E+04 | 1.58E+05 | 1.02E+04 | 5.35E+04 | 1.32E+04 | 1.56E+05    | N/A         | 3.04E+06    |

Palmitoleic SM (d18:1/ SM(d18:1/ SM(d18:1/ SM(d18:1/ SM(d18:1/ SM(d18:1/ SM(d18:1/ SM(d18:1/ SM(d18:1/

|          |          |          |          |          |          |          |          |          |
|----------|----------|----------|----------|----------|----------|----------|----------|----------|
| 2.89E+05 | 4.40E+07 | 2.04E+07 | 4.51E+07 | 3.82E+07 | 3.66E+06 | 4.55E+06 | 4.03E+05 | 2.96E+07 |
| 2.45E+06 | 3.99E+07 | 1.21E+07 | 1.75E+07 | 2.57E+07 | 2.18E+06 | 3.64E+06 | 3.04E+05 | 2.75E+07 |
| 8.40E+05 | 2.67E+07 | 2.00E+07 | 3.95E+07 | 5.27E+07 | 3.65E+06 | 3.63E+06 | 4.68E+05 | 2.01E+07 |
| 6.38E+05 | 3.33E+07 | 2.13E+07 | 4.09E+07 | 5.11E+07 | 3.12E+06 | 6.00E+06 | 3.12E+05 | 2.20E+07 |
| 2.07E+06 | 1.72E+07 | 7.05E+06 | 7.67E+06 | 9.08E+06 | 1.05E+06 | 1.18E+06 | 1.24E+05 | 9.48E+06 |
| 9.96E+05 | 5.87E+06 | 5.65E+06 | 4.05E+06 | 1.44E+07 | 9.24E+05 | 9.29E+05 | 1.30E+05 | 9.37E+06 |
| 1.51E+05 | 2.13E+07 | 3.03E+07 | 2.16E+07 | 6.83E+07 | 3.10E+06 | 4.54E+06 | 3.13E+05 | 1.77E+07 |
| 8.64E+05 | 1.58E+06 | 1.11E+07 | 1.87E+07 | 4.99E+07 | 1.05E+06 | 2.56E+06 | 3.17E+05 | 3.52E+06 |
| 2.04E+05 | 1.92E+07 | 2.42E+07 | 2.78E+07 | 6.17E+07 | 2.90E+06 | 7.12E+06 | 5.14E+05 | 2.65E+07 |
| 5.06E+06 | 3.11E+07 | 3.34E+07 | 4.10E+07 | 5.93E+07 | 4.92E+06 | 6.79E+06 | 5.86E+05 | 2.18E+07 |
| 1.18E+06 | 1.64E+07 | 2.07E+07 | 1.89E+07 | 4.31E+07 | 3.33E+06 | 4.98E+06 | 3.44E+05 | 1.34E+07 |
| 1.95E+06 | 7.56E+06 | 1.13E+07 | 9.26E+06 | 1.47E+07 | 1.28E+06 | 2.43E+06 | 2.40E+05 | 1.33E+07 |
| 4.30E+05 | 1.73E+07 | 2.48E+07 | 2.80E+07 | 7.82E+07 | 3.45E+06 | 8.25E+06 | 7.58E+05 | 2.56E+07 |
| 6.28E+05 | 2.23E+07 | 2.36E+07 | 2.54E+07 | 4.90E+07 | 4.66E+06 | 6.84E+06 | 5.08E+05 | 1.26E+07 |
| 6.39E+06 | 1.44E+07 | 7.70E+06 | 8.61E+06 | 1.37E+07 | 2.49E+06 | 2.64E+06 | 2.38E+05 | 7.86E+06 |
| 2.61E+06 | 1.83E+07 | 3.74E+07 | 4.22E+07 | 6.60E+07 | 3.04E+06 | 5.59E+06 | 7.64E+05 | 3.37E+07 |
| 8.81E+05 | 2.35E+07 | 2.83E+07 | 3.15E+07 | 7.77E+07 | 3.55E+06 | 6.50E+06 | 6.33E+05 | 3.93E+07 |
| 2.44E+06 | 3.77E+07 | 4.02E+07 | 4.24E+07 | 8.64E+07 | 4.41E+06 | 7.73E+06 | 6.48E+05 | 3.65E+07 |
| 6.91E+05 | 8.34E+06 | 8.34E+06 | 7.24E+06 | 2.40E+07 | 1.55E+06 | 4.05E+06 | 2.32E+05 | 1.29E+07 |
| 6.96E+06 | 1.10E+07 | 5.90E+06 | 4.22E+06 | 1.31E+07 | 1.13E+06 | 1.57E+06 | 1.58E+05 | 7.84E+06 |
| 1.37E+06 | 1.41E+07 | 9.19E+06 | 6.52E+06 | 3.12E+07 | 1.76E+06 | 3.12E+06 | 3.20E+05 | 1.31E+07 |

SM(d18:1/ SM(d18:1/ SM(d18:1/ SM(d18:1/ SM(d18:1/ SM(d18:1/ SM(d18:1/ SM(d18:1/ SM(d18:1/

|          |          |          |          |          |          |          |          |          |
|----------|----------|----------|----------|----------|----------|----------|----------|----------|
| 1.62E+07 | 2.08E+08 | 7.04E+06 | 2.39E+07 | 2.46E+06 | 1.49E+07 | 1.97E+08 | 1.13E+08 | 1.08E+07 |
| 1.09E+07 | 1.74E+08 | 4.05E+06 | 1.54E+07 | 2.79E+06 | 1.39E+07 | 1.42E+08 | 1.09E+08 | 6.03E+06 |
| 1.78E+07 | 1.37E+08 | 1.16E+07 | 2.77E+07 | 3.96E+06 | 1.71E+07 | 1.99E+08 | 1.04E+08 | 1.28E+07 |
| 1.54E+07 | 1.73E+08 | 8.99E+06 | 3.57E+07 | 3.07E+06 | 1.72E+07 | 2.11E+08 | 1.43E+08 | 1.25E+07 |
| 6.56E+06 | 7.16E+07 | 3.40E+06 | 1.07E+07 | 8.56E+05 | 7.43E+06 | 1.53E+08 | 4.48E+07 | 3.92E+06 |
| 5.47E+06 | 6.43E+07 | 2.95E+06 | 1.09E+07 | 1.39E+06 | 1.02E+07 | 2.06E+08 | 8.91E+07 | 9.47E+06 |
| 1.35E+07 | 9.05E+07 | 1.22E+07 | 1.27E+07 | 3.44E+06 | 1.87E+07 | 2.48E+08 | 1.28E+08 | 1.82E+07 |
| 3.77E+06 | 1.98E+07 | 5.53E+06 | 1.69E+06 | 1.82E+06 | 1.83E+06 | 4.08E+07 | 1.06E+07 | 1.08E+06 |
| 1.31E+07 | 1.58E+08 | 1.14E+07 | 2.12E+07 | 3.60E+06 | 2.79E+07 | 2.37E+08 | 1.45E+08 | 1.17E+07 |
| 1.75E+07 | 1.21E+08 | 1.32E+07 | 2.02E+07 | 5.43E+06 | 3.50E+07 | 2.10E+08 | 1.96E+08 | 1.27E+07 |
| 1.58E+07 | 1.02E+08 | 1.04E+07 | 2.27E+07 | 2.82E+06 | 1.88E+07 | 2.36E+08 | 1.33E+08 | 2.84E+07 |
| 9.70E+06 | 1.06E+08 | 3.13E+06 | 1.57E+07 | 1.64E+06 | 1.11E+07 | 1.58E+08 | 5.32E+07 | 6.86E+06 |
| 1.31E+07 | 1.83E+08 | 1.45E+07 | 2.35E+07 | 5.61E+06 | 2.55E+07 | 2.68E+08 | 2.05E+08 | 2.32E+07 |
| 1.62E+07 | 9.97E+07 | 1.20E+07 | 1.80E+07 | 6.08E+06 | 1.43E+07 | 2.26E+08 | 6.88E+07 | 1.29E+07 |
| 8.98E+06 | 6.21E+07 | 4.02E+06 | 8.86E+06 | 1.61E+06 | 9.03E+06 | 1.57E+08 | 4.55E+07 | 9.17E+06 |
| 2.25E+07 | 2.09E+08 | 1.27E+07 | 3.13E+07 | 5.68E+06 | 3.42E+07 | 2.35E+08 | 1.71E+08 | 2.07E+07 |
| 2.33E+07 | 2.05E+08 | 9.04E+06 | 2.24E+07 | 4.97E+06 | 2.83E+07 | 2.36E+08 | 2.26E+08 | 2.78E+07 |
| 2.13E+07 | 2.13E+08 | 1.70E+07 | 2.31E+07 | 5.19E+06 | 2.19E+07 | 2.20E+08 | 1.62E+08 | 1.69E+07 |
| 6.29E+06 | 9.48E+07 | 5.99E+06 | 1.67E+07 | 2.03E+06 | 1.80E+07 | 1.84E+08 | 8.74E+07 | 8.30E+06 |
| 8.54E+06 | 6.09E+07 | 3.19E+06 | 7.12E+06 | 1.77E+06 | 6.82E+06 | 1.59E+08 | 5.35E+07 | 1.28E+07 |
| 9.10E+06 | 7.45E+07 | 7.97E+06 | 1.13E+07 | 2.67E+06 | 1.67E+07 | 1.98E+08 | 1.02E+08 | 1.21E+07 |

SM(d18:1/ SM(d18:1/ SM(d18:1/ SM(d18:1/ SM(d18:1/ SM(d18:1/ SM(d18:1/ SM(d18:1/ SM(d18:1/

|          |          |          |          |          |          |          |          |          |
|----------|----------|----------|----------|----------|----------|----------|----------|----------|
| 7.61E+06 | 1.85E+07 | 1.76E+07 | 1.16E+08 | 7.33E+07 | 1.06E+06 | 6.09E+07 | 2.85E+07 | 1.28E+07 |
| 7.55E+06 | 1.93E+07 | 1.56E+07 | 7.02E+07 | 4.24E+07 | 8.89E+05 | 5.25E+07 | 2.43E+07 | 1.10E+07 |
| 7.58E+06 | 2.60E+07 | 2.87E+07 | 1.51E+08 | 6.41E+07 | 9.05E+05 | 4.90E+07 | 4.24E+07 | 2.24E+07 |
| 1.03E+07 | 2.13E+07 | 1.87E+07 | 1.29E+08 | 6.32E+07 | 1.03E+06 | 5.51E+07 | 3.72E+07 | 7.35E+06 |
| 2.69E+06 | 8.42E+06 | 7.89E+06 | 4.14E+07 | 2.17E+07 | 4.17E+05 | 3.68E+07 | 9.29E+06 | 4.80E+06 |
| 8.08E+06 | 1.25E+07 | 9.21E+06 | 4.01E+07 | 3.45E+07 | 4.67E+05 | 2.76E+07 | 1.11E+07 | 2.24E+06 |
| 1.03E+07 | 4.27E+07 | 1.19E+07 | 4.72E+07 | 4.33E+07 | 1.21E+06 | 7.79E+07 | 1.75E+07 | 7.28E+06 |
| 8.31E+05 | 2.05E+06 | 1.46E+06 | 3.75E+06 | 4.80E+06 | 3.47E+05 | 4.40E+06 | 2.52E+06 | 1.60E+06 |
| 1.07E+07 | 2.56E+07 | 1.91E+07 | 7.54E+07 | 6.78E+07 | 1.32E+06 | 5.23E+07 | 2.74E+07 | 1.02E+07 |
| 8.65E+06 | 3.28E+07 | 5.21E+07 | 1.00E+08 | 4.66E+07 | 1.61E+06 | 7.81E+07 | 5.40E+07 | 1.10E+07 |
| 8.47E+06 | 4.27E+07 | 1.04E+07 | 5.25E+07 | 5.68E+07 | 8.99E+05 | 6.27E+07 | 1.58E+07 | 7.72E+06 |
| 3.97E+06 | 1.65E+07 | 9.86E+06 | 3.54E+07 | 2.85E+07 | 4.62E+05 | 2.72E+07 | 1.09E+07 | 9.13E+06 |
| 1.85E+07 | 4.68E+07 | 1.44E+07 | 7.39E+07 | 8.25E+07 | 1.28E+06 | 7.25E+07 | 2.24E+07 | 7.63E+06 |
| 5.61E+06 | 5.83E+07 | 9.66E+06 | 3.91E+07 | 5.29E+07 | 9.64E+05 | 8.68E+07 | 1.19E+07 | 1.89E+07 |
| 4.08E+06 | 1.71E+07 | 8.14E+06 | 3.27E+07 | 3.72E+07 | 5.41E+05 | 3.95E+07 | 8.79E+06 | 1.18E+07 |
| 1.11E+07 | 5.33E+07 | 2.57E+07 | 5.94E+07 | 5.53E+07 | 1.43E+06 | 5.17E+07 | 2.84E+07 | 1.19E+07 |
| 2.01E+07 | 3.03E+07 | 2.18E+07 | 1.04E+08 | 6.91E+07 | 1.61E+06 | 5.88E+07 | 3.97E+07 | 3.89E+06 |
| 1.30E+07 | 4.35E+07 | 2.31E+07 | 1.10E+08 | 6.27E+07 | 2.14E+06 | 6.76E+07 | 4.61E+07 | 9.40E+06 |
| 6.66E+06 | 1.65E+07 | 1.35E+07 | 3.75E+07 | 4.14E+07 | 5.97E+05 | 3.37E+07 | 1.33E+07 | 6.80E+06 |
| 5.43E+06 | 2.40E+07 | 6.00E+06 | 2.85E+07 | 3.03E+07 | 3.77E+05 | 5.09E+07 | 7.51E+06 | 4.48E+06 |
| 8.75E+06 | 2.94E+07 | 8.77E+06 | 2.19E+07 | 3.37E+07 | 6.41E+05 | 7.06E+07 | 8.64E+06 | 7.57E+06 |

| SM(d18:1/ |
|-----------|-----------|-----------|-----------|-----------|-----------|-----------|-----------|-----------|
| 3.57E+07  | 1.48E+07  | 4.40E+06  | 2.55E+07  | N/A       | N/A       | 4.73E+06  | 1.45E+07  | 7.85E+06  |
| 2.69E+07  | 1.04E+07  | 3.23E+06  | 2.26E+07  | N/A       | N/A       | 6.55E+06  | 8.62E+06  | 7.98E+06  |
| 4.98E+07  | 1.46E+07  | 2.85E+06  | 4.23E+07  | N/A       | N/A       | 2.28E+06  | 6.58E+06  | 7.78E+06  |
| 3.53E+07  | 1.33E+07  | 2.88E+06  | 1.35E+07  | N/A       | N/A       | 1.77E+06  | 7.13E+06  | 3.85E+06  |
| 2.36E+07  | 6.40E+06  | 1.49E+06  | 9.00E+06  | N/A       | N/A       | 1.28E+06  | 4.45E+06  | 2.86E+06  |
| 1.73E+07  | 3.44E+06  | 1.05E+06  | 3.48E+06  | N/A       | N/A       | 5.19E+05  | 2.68E+06  | 1.20E+06  |
| 4.62E+07  | 8.64E+06  | 2.28E+06  | 1.32E+07  | N/A       | N/A       | 1.48E+06  | 4.90E+06  | 4.06E+06  |
| 1.02E+07  | 2.83E+03  | 8.08E+05  | 1.41E+06  | N/A       | N/A       | 1.65E+05  | 1.08E+06  | 4.96E+05  |
| 9.25E+07  | 1.25E+07  | 3.46E+06  | 1.92E+07  | N/A       | N/A       | 9.92E+05  | 1.36E+07  | 3.30E+06  |
| 1.45E+08  | 1.90E+07  | 1.22E+07  | 2.03E+07  | N/A       | N/A       | 8.66E+05  | 4.33E+07  | 2.68E+06  |
| 5.15E+07  | 7.21E+06  | 2.06E+06  | 1.43E+07  | N/A       | N/A       | 1.36E+06  | 6.45E+06  | 3.02E+06  |
| 4.75E+07  | 4.39E+06  | 1.75E+06  | 1.78E+07  | N/A       | N/A       | 1.23E+06  | 3.60E+06  | 4.25E+06  |
| 3.84E+07  | 8.62E+06  | 2.56E+06  | 1.33E+07  | N/A       | N/A       | 9.45E+05  | 5.00E+06  | 2.80E+06  |
| 4.97E+07  | 8.40E+06  | 2.23E+06  | 3.66E+07  | N/A       | N/A       | 1.72E+06  | 4.74E+06  | 6.74E+06  |
| 6.54E+07  | 5.72E+06  | 1.80E+06  | 2.43E+07  | N/A       | N/A       | 1.67E+06  | 4.27E+06  | 6.25E+06  |
| 1.30E+08  | 1.48E+07  | 9.56E+06  | 2.07E+07  | N/A       | N/A       | 1.34E+06  | 2.73E+07  | 6.89E+06  |
| 3.27E+07  | 1.16E+07  | 2.92E+06  | 5.70E+06  | N/A       | N/A       | 1.08E+06  | 7.70E+06  | 1.53E+06  |
| 5.74E+07  | 1.81E+07  | 5.31E+06  | 1.66E+07  | N/A       | N/A       | 1.85E+06  | 9.77E+06  | 4.91E+06  |
| 6.32E+07  | 5.58E+06  | 1.88E+06  | 1.11E+07  | N/A       | N/A       | 8.06E+05  | 8.43E+06  | 1.89E+06  |
| 1.16E+07  | 2.67E+06  | 1.53E+06  | 8.09E+06  | N/A       | N/A       | 9.41E+05  | 5.27E+06  | 2.12E+06  |
| 2.63E+07  | 3.54E+06  | 1.78E+06  | 1.38E+07  | N/A       | N/A       | 1.32E+06  | 2.17E+06  | 3.36E+06  |

SM(d18:1/ Stearic acid

8.19E+07 1.52E+06

7.60E+07 1.39E+06

3.96E+07 1.72E+06

5.97E+07 1.26E+06

1.92E+07 1.49E+06

4.36E+06 1.17E+06

1.85E+07 1.31E+06

8.90E+05 5.43E+06

1.24E+07 1.61E+06

2.66E+07 1.81E+06

2.00E+07 1.51E+06

7.32E+06 1.22E+06

9.60E+06 1.14E+06

1.32E+07 1.78E+06

7.70E+06 1.19E+06

1.43E+07 1.33E+06

3.28E+07 1.24E+06

5.39E+07 1.04E+06

5.07E+06 1.06E+06

6.23E+06 1.57E+06

7.71E+06 1.61E+06
