# Supplementary figures and images for: A Mutation in the Mitochondrial Aspartate/Glutamate Carrier Leads to a More Oxidizing Intramitochondrial Environment and an Inflammatory Myopathy in Dutch Shepherd Dogs
Source: PubMed Central journal article supplement — J Neuromuscul Dis. 2019 Oct 31;6(4):485–501. doi: 10.3233/JND-190421 (PMC6918910; doi:10.3233/jnd-190421), 2019-10-31

# Supplemental Figure S1

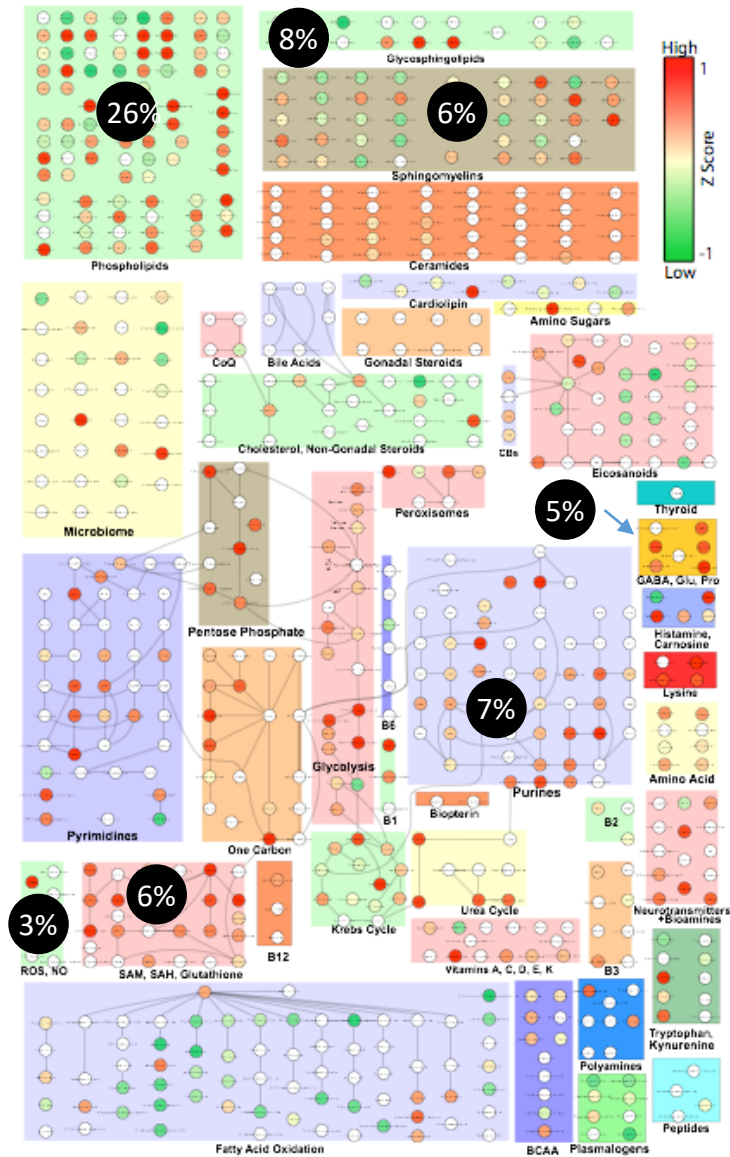

Supplement: jnd-6-jnd190421-s004.pdf [file jnd-6-jnd190421-s004.pdf]
